# Supplementary material for: Photoinduced synthesis of C2-linked phosphine oxides via radical difunctionalization of acetylene
Source: Royal Society of Chemistry journal article supplement (doi:10.1039/d3gc02794e), 2023-01-01
Supplement: d3gc02794e1.pdf [file d3gc02794e1.pdf]

## Electronic Supplementary Information

### Photoinduced synthesis of C2-linked phosphine oxides via radical difunctionalization of acetylene

Kangkui Li,<sup>§</sup> Jiazhen Deng,<sup>§</sup> Xianyang Long and Shifa Zhu\*

*Key Laboratory of Functional Molecular Engineering of Guangdong Province School of Chemistry and Chemical Engineering, South China University of Technology 510640, Guangzhou, China; E-mail: [zhusf@scut.edu.cn](mailto:zhusf@scut.edu.cn)*

<sup>§</sup> These authors contributed equally

#### Table of Contents

|                                                               |    |
|---------------------------------------------------------------|----|
| 1. General information.....                                   | 2  |
| 2. General procedure.....                                     | 2  |
| 3. Reaction optimization.....                                 | 5  |
| 4. Control experiments.....                                   | 6  |
| 5. Calculation of total yield and sustainability metrics..... | 9  |
| 6. Characterization data of products.....                     | 11 |
| 7. NMR spectra.....                                           | 32 |
| 8. References.....                                            | 92 |

## 1. General information

Unless stated otherwise, all reactions were carried out under 1 atm acetylene. NMR spectra were recorded on Bruker AMX 500 spectrometer at 500 MHz for  $^1\text{H}$  NMR, 125 MHz for  $^{13}\text{C}$  NMR, 202 MHz for  $^{31}\text{P}$  NMR, 470 MHz for  $^{19}\text{F}$  NMR. The  $^1\text{H}$  NMR chemical shifts were measured relative to  $\text{CDCl}_3$  with trimethylbenzene as internal standard. Melting points were measured on X-4 melting point apparatus and uncorrected. High resolution mass spectra (HRMS) were performed on a VG Autospec-3000 spectrometer. Column chromatography was performed with silica gel (300-400 mesh) with petroleum ether and ethyl acetate as eluents. Commercially available reagents and catalysts were purchased from Energy Chemical Ltd. or Bide Pharmatech Ltd., and were used without further purification unless indicated otherwise. The light source conditions: 10 W blue LED (460-470 nm, WP-TEC-1020HSL, made in WATTCAS, China), and maintaining a relatively constant temperature close to room temperature by regulating the condensed water.

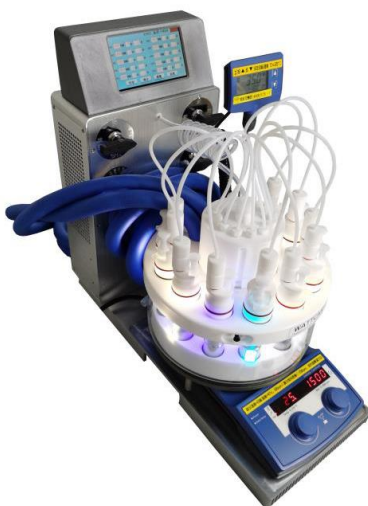

## 2. General procedure

### 2.1 General procedure for the synthesis of product 2

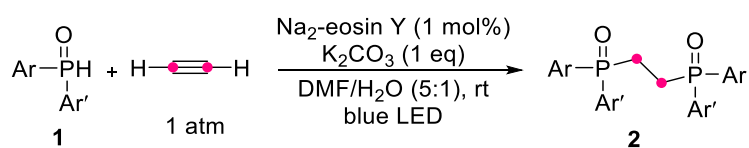

$\text{Na}_2$ -eosin Y (2.1 mg, 0.003 mmol, 1 mol%),  $\text{K}_2\text{CO}_3$  (41.5 mg, 0.3 mmol, 1 eq) and phosphine oxides **1** (0.3 mmol, 1 eq) were added sequentially to a 10 mL Schlenk tube equipped with a magnetic stir bar. This resulting mixture was sealed and degassed via vacuum evacuation and subsequent backfill with acetylene for three times. Then, DMF (2.5 mL) and  $\text{H}_2\text{O}$  (0.5 mL) were subsequently added in this order. The reaction was stirred under 10 W blue LED irradiation at room temperature. The mixture was extracted with ethyl acetate and the organic phase was dried over  $\text{Na}_2\text{SO}_4$ . The resulting solution was concentrated in vacuum and the residue was purified by chromatography on silica gel, eluting with the mixture of ethyl acetate/petroleum ether to give products **2** (DPPE-dioxide analogues), and the solvents is recycled. The yield of products was recorded in isolated yield.

**100 mmol scale-up experiment:** Na<sub>2</sub>-eosin Y (692 mg, 1 mmol, 1 mol%), K<sub>2</sub>CO<sub>3</sub> (13.82 g, 100 mmol, 1 eq) and **1a** (100 mmol, 20.2 g, 1 eq) were added sequentially to a 500 mL three-necked reaction flask was equipped with a magnetic stir bar. This resulting mixture was sealed and degassed via vacuum evacuation and subsequent backfill with acetylene for three times. Then, DMF (250 mL) and H<sub>2</sub>O (50 mL) were subsequently added in this order. The reaction was stirred under blue LED (50 W \* 3) irradiation at room temperature. The mixture was extracted with ethyl acetate, and washed with water, then the organic phase was dried over Na<sub>2</sub>SO<sub>4</sub>. The resulting solution was quickly filtered through silica gel to remove the pigment and was concentrated in vacuum. The crude product **2a** was purified by recrystallization with dichloromethane/petroleum ether (15.8 g, 74% yield).

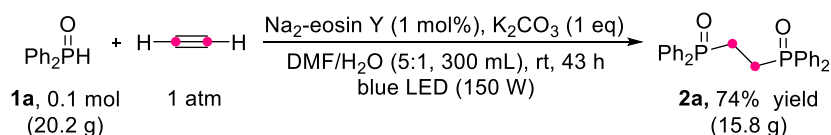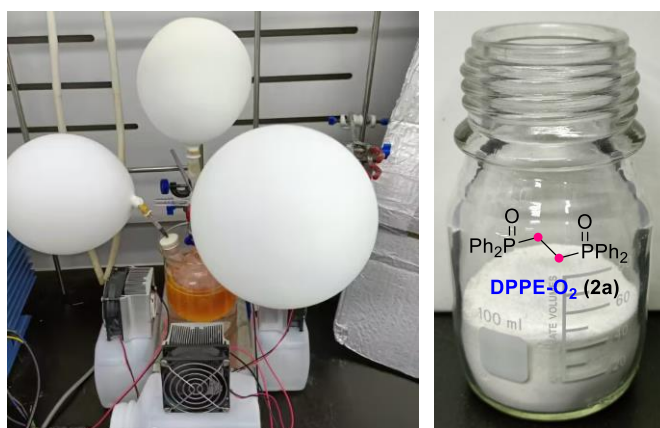

## 2.2 General procedure for the synthesis of product 3

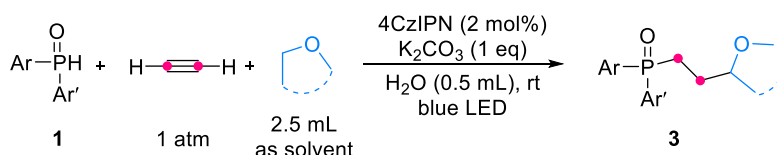

4CzIPN (4.7 mg, 0.006 mmol, 2 mol%), K<sub>2</sub>CO<sub>3</sub> (41.5 mg, 0.3 mmol, 1 eq) and **1** (0.3 mmol, 1 eq) were added sequentially to a 10 mL Schlenk tube equipped with a magnetic stir bar. This resulting mixture was sealed and degassed via vacuum evacuation and subsequent backfill with acetylene for three times. Then, solvent (2.5 mL) and H<sub>2</sub>O (0.5 mL) were subsequently added in this order. For phosphine oxides, 0.08 mmol, 0.08 mmol, 0.07 mmol, 0.07 mmol were added in batches every 7 hours. The reaction was stirred under 10 W blue LED irradiation at room temperature. The resulting solution was concentrated in vacuum and the residue was purified by chromatography on silica gel, eluting with the mixture of ethyl acetate/petroleum ether to give products **3** (C2-linked oxacyclic diarylalkylphosphine oxides), and was recorded in isolated yield.

## 2.3 Reduction to phosphine ligands

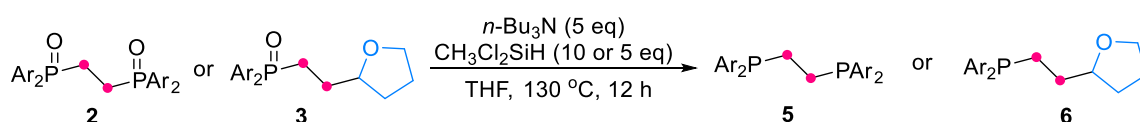

The 10 mL flask was pumped with nitrogen for three times, **2** or **3** (0.1-0.3 mmol, 1 eq) dissolved in 1 mL dry THF was added into the tube, then *n*-Bu<sub>3</sub>N (0.5-1.5 mmol, 5 eq) and CH<sub>3</sub>Cl<sub>2</sub>SiH (0.5-3 mmol, 10 or 5 eq) were added, and the reaction was carried out at 130 °C for 12 h. The reaction mixture was then diluted with EtOAc and filtered through a short pad of silica using EtOAc. The filtrate was concentrated in vacuo before it was purified by flash chromatography (PE/EA = 20:1) on silica gel to afford products **5** or **6**.

## 2.4 Preparation of substrates

### a) Synthesis of phosphine oxides **1a**, **1e**, **1g** and **1j**<sup>1</sup>

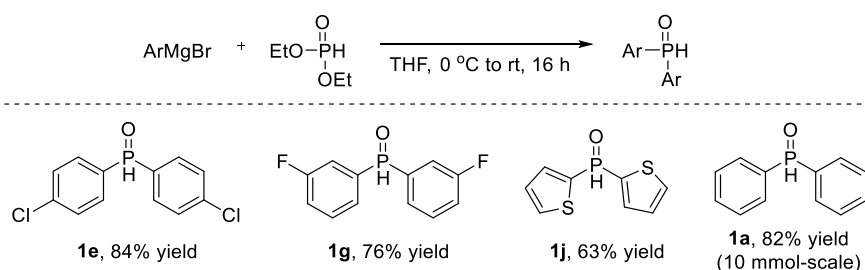

A 50 mL two-necked reaction flask was equipped with a magnetic stir bar and flushed with nitrogen. Diethylphosphite (0.78 mL, 6 mmol) was added dropwise at 0 °C to a solution of Grignard reagent in THF (19.2 mmol ArMgBr). The mixture was stirred for 15-30 minutes at 0 °C, then stirred at room temperature for 16 hours. After that it was cooled again to 0 °C, and NH<sub>4</sub>Cl aqueous was then added slowly. The mixture was extracted with EtOAc and the organic phase was washed with NaHCO<sub>3</sub> aqueous and brine, then it was dried over Na<sub>2</sub>SO<sub>4</sub>. After the solvent had been completely removed, the residue was purified by column chromatography on silica gel using petroleum ether/ethyl acetate = 1/1 as eluent to give the phosphine oxide substrates, and the solvents is recycled. The other symmetric phosphine oxides are commercially available. Notes: the sources of **1a** include commercial purchase and preparation through the above methods; the Grignard reagents were purchased from Energy Chemical Ltd.

### b) Synthesis of phosphine oxides **1k-p**<sup>2</sup>

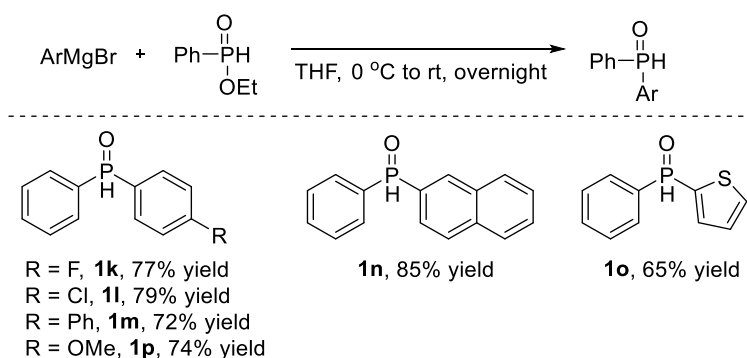

A 50 mL two-necked reaction flask was equipped with a magnetic stir bar and flushed with nitrogen. Ethyl phenylphosphinate (1.02 g, 6 mmol) was added dropwise at 0 °C to a solution of Grignard reagent in THF (9.6 mmol ArMgBr). The mixture was stirred for 15-30 minutes at 0 °C, then stirred at room temperature overnight. After that it was cooled again to 0 °C, the resulting mixture was quenched with 1 M HCl and extracted with EtOAc. The combined organic layer was dried over Na<sub>2</sub>SO<sub>4</sub> and evaporated in vacuo. After the solvent had been completely removed, the residue was purified by column chromatography on silica gel using petroleum ether/ethyl acetate = 1/1 as eluent





## 4. Control experiments

### a) Control experiments with phosphinoyl ethylene

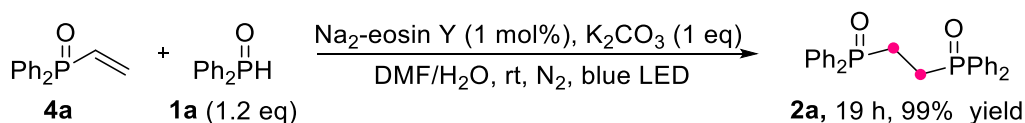

$\text{Na}_2\text{-eosin Y}$  (1.4 mg, 0.002 mmol, 1 mol%),  $\text{K}_2\text{CO}_3$  (27.7 mg, 0.2 mmol, 1 eq), **1a** (0.24 mmol, 1.2 eq) and phosphinoyl ethylene (**4a**, 0.2 mmol, 1 eq) were added sequentially to a 10 mL Schlenk tube equipped with a magnetic stir bar. This resulting mixture was sealed and degassed via vacuum evacuation and subsequent backfill with nitrogen for three times. Then, DMF (1.5 mL) and  $\text{H}_2\text{O}$  (0.3 mL) were subsequently added in this order. The reaction was stirred under 10 W blue LED irradiation at room temperature. The resulting solution was concentrated in vacuum and the residue was purified by chromatography on silica gel, eluting with the mixture of ethyl acetate/petroleum ether to give the product **2a** in 99% isolated yield.

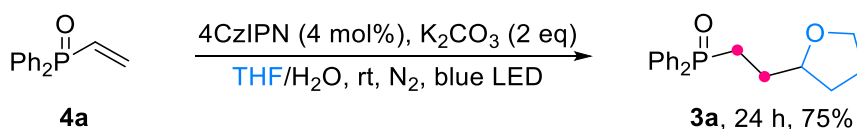

4CzIPN (4.7 mg, 0.006 mmol, 4 mol%),  $\text{K}_2\text{CO}_3$  (41.5 mg, 0.3 mmol, 2 eq) and phosphinoyl ethylene (**4a**, 0.15 mmol, 1 eq) were added sequentially to a 10 mL Schlenk tube equipped with a magnetic stir bar. This resulting mixture was sealed and degassed via vacuum evacuation and subsequent backfill with nitrogen for three times. Then, THF (2.5 mL) and  $\text{H}_2\text{O}$  (0.5 mL) were subsequently added in this order. The reaction was stirred under 10 W blue LED irradiation at room temperature. The resulting solution was concentrated in vacuum and the residue was purified by chromatography on silica gel, eluting with the mixture of ethyl acetate/petroleum ether to give the product **3a** in 75% isolated yield.

### b) Radical capture experiments with TEMPO

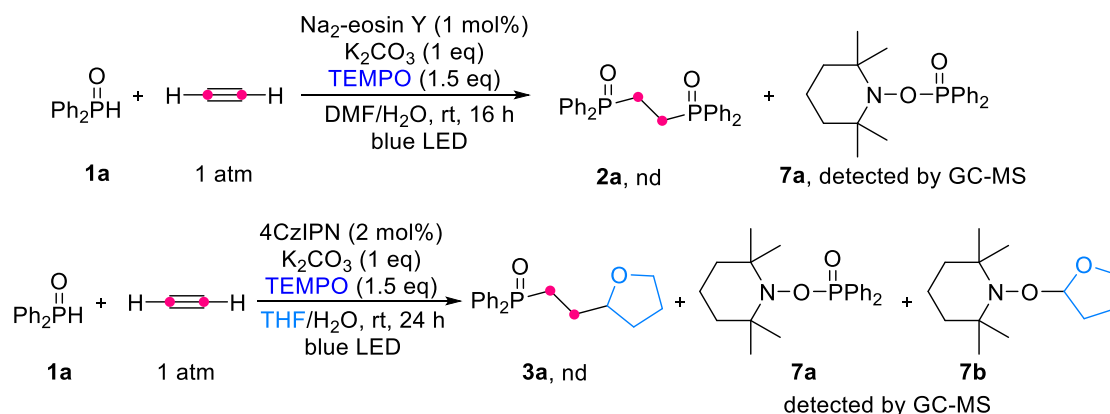

According to the general procedure 2, the above radical capture experiments with TEMPO (1.5 eq) were carried out, the related radical capture products **7a** and **7b** were detected by GC-MS: **7a**,  $m/z$  357.07 (M); **7b**,  $m/z$  228.18 ( $\text{M}+\text{H}^+$ ).

### c) Deuterium-labelling experiments



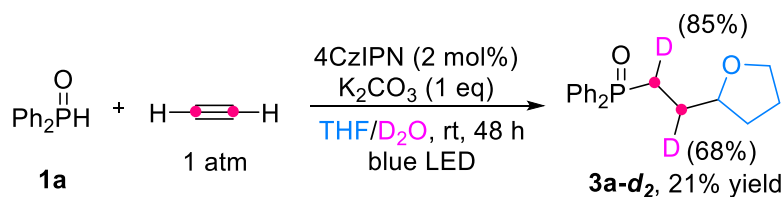

According to the general procedure 2.2, D<sub>2</sub>O was used instead of H<sub>2</sub>O, the deuterium-labelling product **3a-d<sub>2</sub>** was obtained in 21% isolated yield. <sup>1</sup>H NMR (500 MHz, CDCl<sub>3</sub>) δ 7.83 – 7.65 (m, 4H), 7.59 – 7.39 (m, 6H), 3.83 (ddd, *J* = 21.7, 13.3, 6.1 Hz, 2H), 3.70 (dd, *J* = 14.8, 7.3 Hz, 1H), 2.51 (t, *J* = 12.7 Hz, 1H), 2.26 (dd, *J* = 17.5, 9.5 Hz, 1H), 1.97 (dt, *J* = 12.5, 6.6 Hz, 1H), 1.89 – 1.80 (m, 3H), 1.71 (dd, *J* = 14.0, 7.2 Hz, 1H), 1.46 (td, *J* = 15.6, 7.7 Hz, 1H). HRMS (ESI) *m/z*: [M + H]<sup>+</sup> calcd for C<sub>18</sub>H<sub>20</sub>D<sub>2</sub>O<sub>2</sub>P<sup>+</sup> 303.1477; found 303.1469.

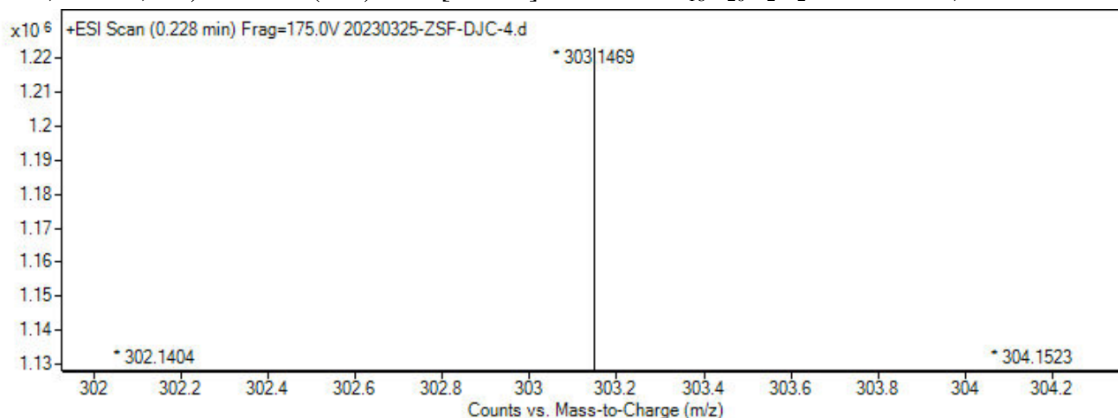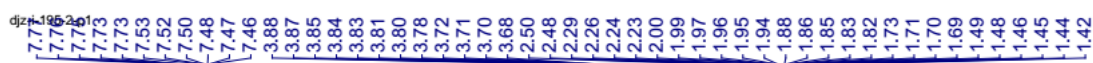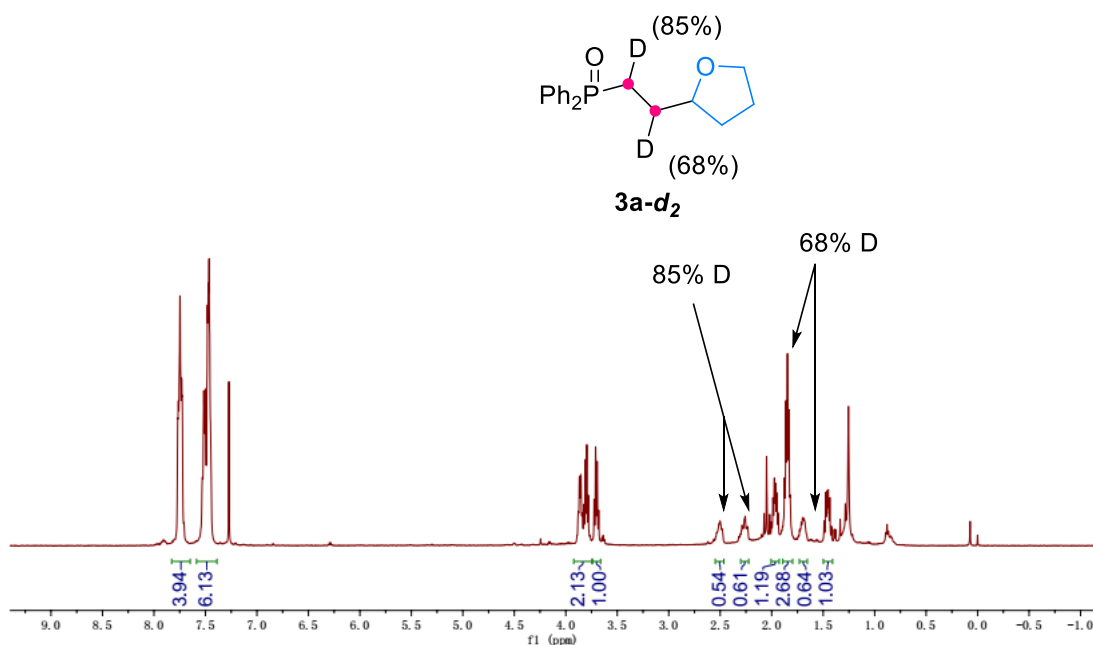

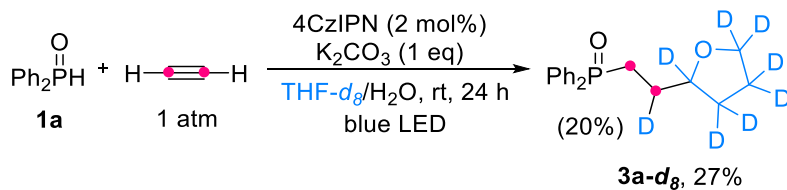

According to the general procedure 2.2, THF- $d_8$  was used instead of THF, the deuterium-labelling product **3a- $d_8$**  was obtained in 27% isolated yield.  $^1\text{H NMR}$  (500 MHz,  $\text{CDCl}_3$ )  $\delta$  7.80 – 7.69 (m, 4H), 7.55 – 7.43 (m, 6H), 2.59 – 2.45 (m, 1H), 2.34 – 2.22 (m, 1H), 1.89 – 1.81 (m, 1H), 1.69 (ddd,  $J = 18.4, 8.0, 4.0$  Hz, 0.8H). **HRMS** (ESI)  $m/z$ :  $[\text{M} + \text{H}]^+$  calcd for  $\text{C}_{18}\text{H}_{14}\text{D}_8\text{O}_2\text{P}^+$  309.1854; found 309.1845.

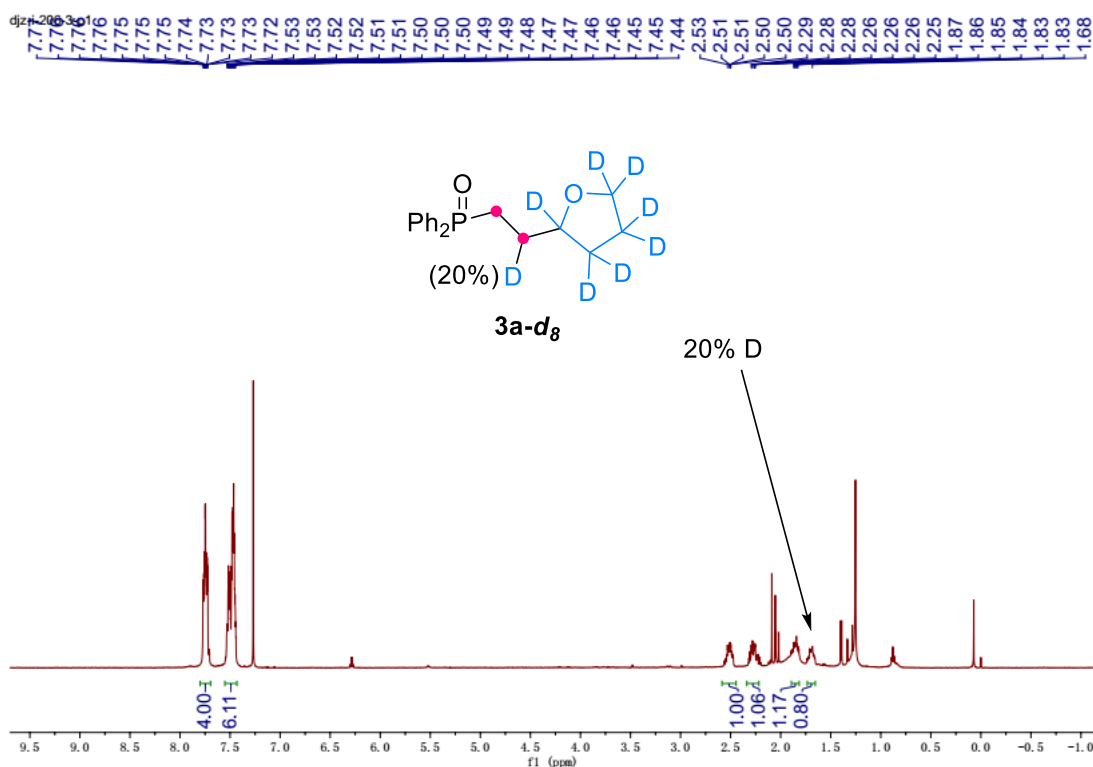

## 5. Calculation of total yield and sustainability metrics

### a) Total yield<sup>a</sup>

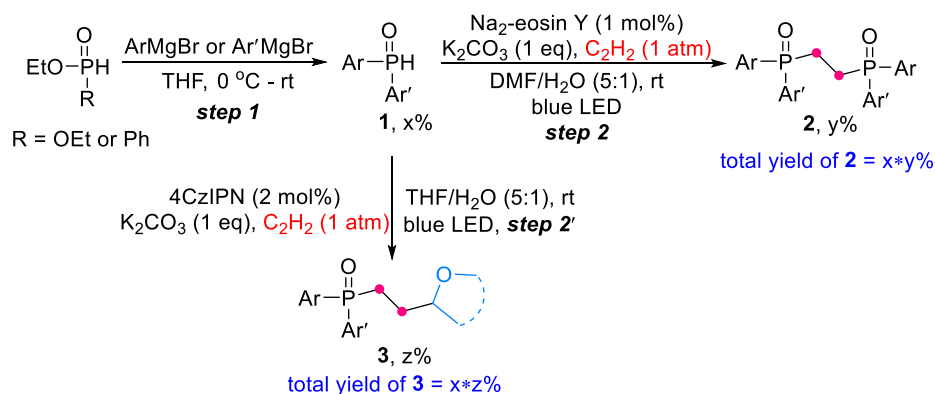

| Entry | Product   | step 1 (%) | Step 2 or step 2' (%) | Total yield (%) |
|-------|-----------|------------|-----------------------|-----------------|
| 1     | <b>2e</b> | 84         | 63                    | 53              |
| 2     | <b>2g</b> | 76         | 56                    | 43              |
| 3     | <b>2j</b> | 63         | 30                    | 19              |
| 4     | <b>2k</b> | 77         | 42                    | 32              |
| 5     | <b>2l</b> | 79         | 52                    | 41              |
| 6     | <b>2m</b> | 72         | 58                    | 42              |
| 7     | <b>2n</b> | 85         | 55                    | 47              |
| 8     | <b>2o</b> | 65         | 64                    | 42              |
| 9     | <b>3e</b> | 84         | 54                    | 45              |
| 10    | <b>3h</b> | 76         | 50                    | 38              |
| 11    | <b>3k</b> | 63         | 22                    | 14              |
| 12    | <b>3l</b> | 74         | 41                    | 30              |
| 13    | <b>3m</b> | 77         | 42                    | 32              |
| 14    | <b>3n</b> | 79         | 49                    | 39              |
| 15    | <b>3o</b> | 72         | 45                    | 32              |
| 16    | <b>3p</b> | 85         | 50                    | 43              |

<sup>a</sup>Only for the substrates that need to be prepared.

### b) Atom economy (atom utilisation)

$$\text{Atom economy} = \frac{\text{FW (g/mol) product}}{\text{FW of all reactants}} * 100\%$$

$$\left. \begin{aligned} &= \frac{430}{202*2+26} * 100\% = 100\% \quad (\text{example 1, for } \mathbf{2a}) \\ &= \frac{300}{202+26+72} * 100\% = 100\% \quad (\text{example 2, for } \mathbf{3a}) \end{aligned} \right\}$$

### c) Process mass intensity (PMI)

$$\text{PMI}_{(\text{reaction})} = \frac{\text{total input mass to reaction (g)}}{\text{mass of product (g)}}$$

i) For the 0.3 mmol-scale reaction of **1a** to **2a**

$$\text{PMI} = \frac{60.6 \text{ mg (1a)} + 255 \text{ mg (C}_2\text{H}_2\text{)}^a + 2.1 \text{ mg (Na}_2\text{-eosin Y)} + 41.5 \text{ mg (K}_2\text{CO}_3\text{)} + 2370 \text{ mg (DMF)} + 500 \text{ mg (H}_2\text{O)}}{50.5 \text{ mg (2a)}}$$

$$= \frac{3229.2}{50.5} = \mathbf{63.9}$$

ii) For the 0.3 mmol-scale reaction of **1a** to **3a**

$$\text{PMI} = \frac{60.6 \text{ mg (1a)} + 255 \text{ mg (C}_2\text{H}_2\text{)}^a + 4.7 \text{ (4CzIPN)} + 41.5 \text{ mg (K}_2\text{CO}_3\text{)} + 2225 \text{ mg (THF)} + 500 \text{ mg (H}_2\text{O)}}{63.6 \text{ mg (3a)}}$$

$$= \frac{3086.8}{63.6} = \mathbf{48.5}$$

iii) For the 100 mmol-scale reaction of **1a** to **2a**

$$\text{PMI} = \frac{20.2 \text{ g (1a)} + 5.4 \text{ g (C}_2\text{H}_2\text{)}^a + 0.7 \text{ g (Na}_2\text{-eosin Y)} + 13.8 \text{ g (K}_2\text{CO}_3\text{)} + 237 \text{ g (DMF)} + 50 \text{ g (H}_2\text{O)}}{15.8 \text{ g (2a)}}$$

$$= \frac{327.1}{15.8} = \mathbf{20.7}$$

<sup>a</sup>Based on the volume change of the acetylene balloon.

#### d) EcoScale of 100 mmol 1a scale-up reaction

| Parameter                                         | Penalty   |
|---------------------------------------------------|-----------|
| 1. Yield: 74%                                     | 13        |
| 2. Price of reaction <sup>a</sup> : < \$10        | 0         |
| 3. Safety <sup>b</sup> : DMF (T)                  | 5         |
| Na <sub>2</sub> -eosin Y (F, T)                   | 10        |
| acetylene (F <sup>+</sup> )                       | 10        |
| 4. rt, 43 h                                       | 2         |
| 5. 1 atm                                          | 0         |
| 6. Extraction with EtOAc                          | 3         |
| 7. Drying over Na <sub>2</sub> SO <sub>4</sub>    | 0         |
| 8. Crystallization and filtration                 | 1         |
| <i>Penalty points total</i>                       | <i>44</i> |
| <hr/>                                             |           |
| <b>EcoScale = 100 - Penalty points total = 56</b> |           |

<sup>a</sup>Price of reaction components (to obtain 10 mmol of end product). <sup>b</sup>Based on the hazard warning symbols.

## 6. Characterization data of products

### ethane-1,2-diylbis(diphenylphosphine oxide)<sup>3</sup>

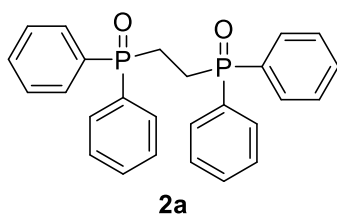

White solid, 50.5 mg, 78% yield. <sup>1</sup>H NMR (500 MHz, CDCl<sub>3</sub>) δ 7.71 (s, 8H), 7.48 (d, *J* = 28.7 Hz, 12H), 2.53 (s, 4H). <sup>13</sup>C NMR (126 MHz, CDCl<sub>3</sub>) δ 132.05, 131.88 (d, *J* = 99.6 Hz), 130.74 (t, *J* = 4.5 Hz), 128.82 (t, *J* = 5.8 Hz), δ 22.05 – 21.29 (m). <sup>31</sup>P NMR (202 MHz, CDCl<sub>3</sub>) δ 32.60.

### ethane-1,2-diylbis(di-p-tolylphosphine oxide)

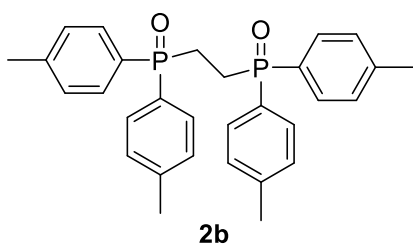

White solid, 41.3 mg, 57% yield, m.p. 225-227 °C. <sup>1</sup>H NMR (500 MHz, CDCl<sub>3</sub>) δ 7.57 (dd, *J* = 11.6, 6.9 Hz, 8H), 7.24 (d, *J* = 7.6 Hz, 8H), 2.46 (s, 4H), 2.36 (s, 12H). <sup>13</sup>C NMR (126 MHz, CDCl<sub>3</sub>) δ 142.45, 130.80 (t, *J* = 4.7 Hz), 129.52 (t, *J* = 6.0 Hz), 128.81 (d, *J* = 103.0 Hz), 22.19 – 21.54 (m), 21.56. <sup>31</sup>P NMR (202 MHz, CDCl<sub>3</sub>) δ 33.20. HRMS (ESI) *m/z*: [M + H]<sup>+</sup> calcd for C<sub>30</sub>H<sub>33</sub>O<sub>2</sub>P<sub>2</sub><sup>+</sup> 487.1950; found 487.1955.

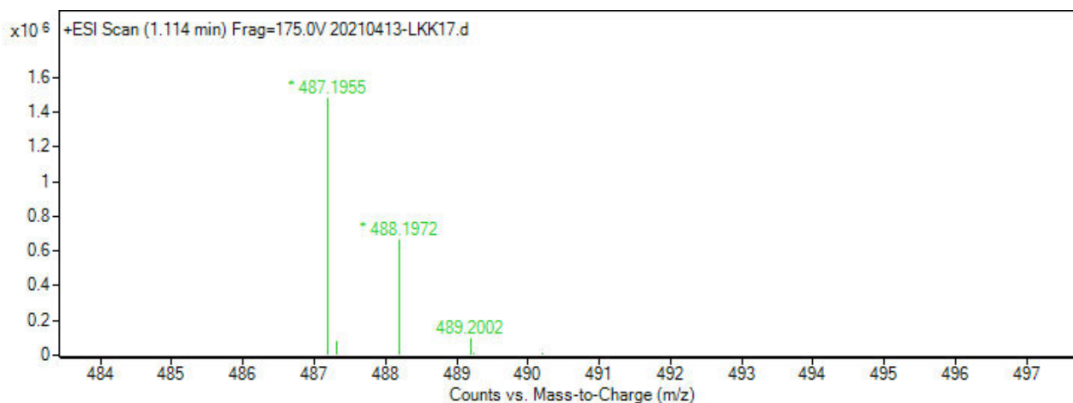

**ethane-1,2-diylbis(bis(4-methoxyphenyl)phosphine oxide)**

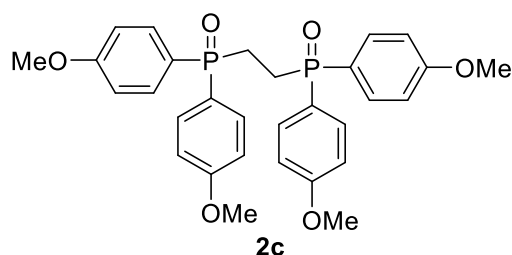

White solid, 28.9 mg, 35% yield, m.p. 149-151 °C.  $^1\text{H NMR}$  (500 MHz,  $\text{CDCl}_3$ )  $\delta$  7.60 (td,  $J = 8.5, 6.4$  Hz, 8H), 6.94 (d,  $J = 8.3$  Hz, 8H), 3.82 (s, 12H), 2.43 (d,  $J = 1.7$  Hz, 4H).  $^{13}\text{C NMR}$  (126 MHz,  $\text{CDCl}_3$ )  $\delta$  162.44, 132.63 (t,  $J = 5.4$  Hz), 123.96 – 122.78 (m), 114.35 (t,  $J = 6.4$  Hz), 55.33, 22.64 – 21.61 (m).  $^{31}\text{P NMR}$  (202 MHz,  $\text{CDCl}_3$ )  $\delta$  33.04. **HRMS** (ESI)  $m/z$ :  $[\text{M} + \text{H}]^+$  calcd for  $\text{C}_{30}\text{H}_{33}\text{O}_6\text{P}_2^+$  551.1747; found 551.1738.

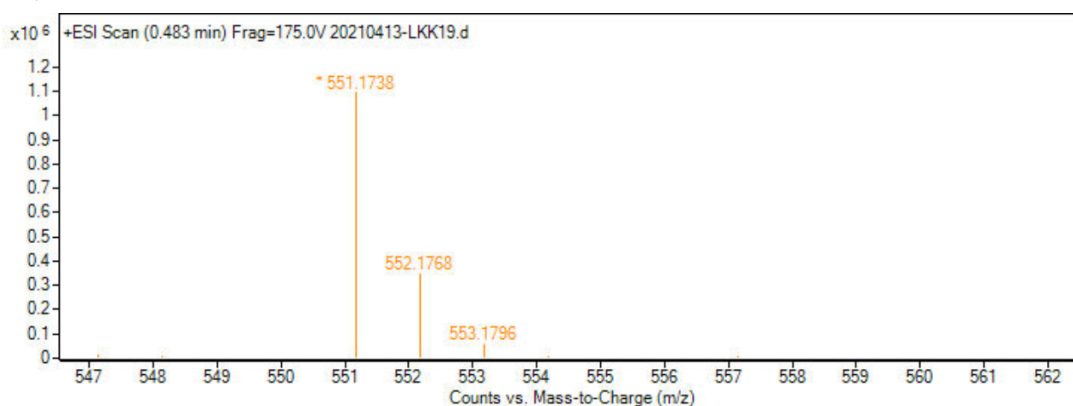

**ethane-1,2-diylbis(bis(4-fluorophenyl)phosphine oxide)**

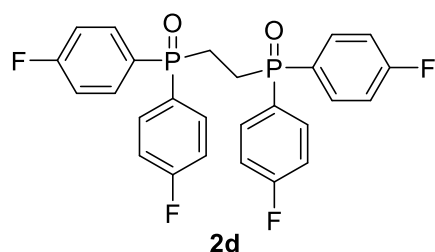

White solid, 43.7 mg, 58% yield, m.p. 211-213 °C.  $^1\text{H NMR}$  (500 MHz,  $\text{CDCl}_3$ )  $\delta$  7.78 – 7.61 (m, 8H), 7.17 (t,  $J = 8.4$  Hz, 8H), 2.47 (s, 4H).  $^{13}\text{C NMR}$  (126 MHz,  $\text{CDCl}_3$ )  $\delta$  165.22 (d,  $J = 254.6$  Hz), 133.23 (dt,  $J = 9.0, 5.5$  Hz), 127.45 (d,  $J = 103.9$  Hz), 116.47 (dt,  $J = 21.3, 6.4$  Hz), 22.41 – 21.27 (m).  $^{31}\text{P NMR}$  (202 MHz,  $\text{CDCl}_3$ )  $\delta$  31.41.  $^{19}\text{F NMR}$  (471 MHz,  $\text{CDCl}_3$ )  $\delta$  -105.64. **HRMS** (ESI)  $m/z$ :  $[\text{M} + \text{H}]^+$  calcd for  $\text{C}_{26}\text{H}_{21}\text{F}_4\text{O}_2\text{P}_2^+$



503.0947; found 503.0946.

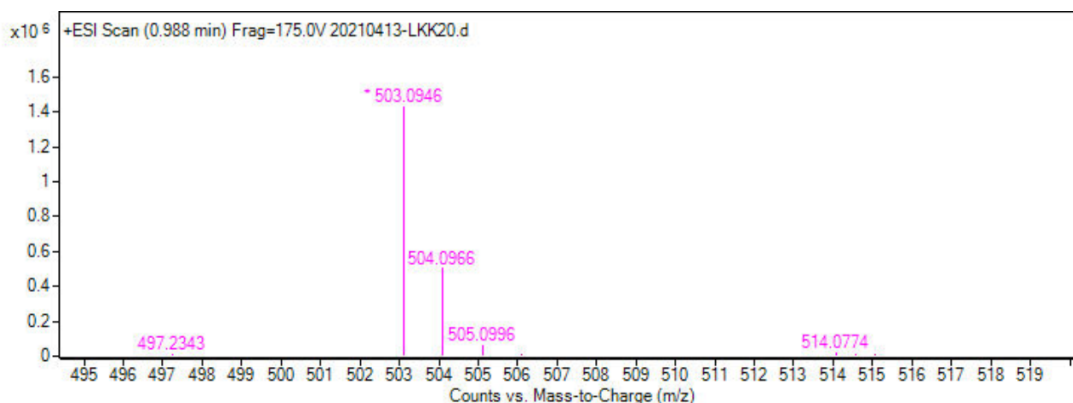

### ethane-1,2-diylbis(bis(4-chlorophenyl)phosphine oxide)

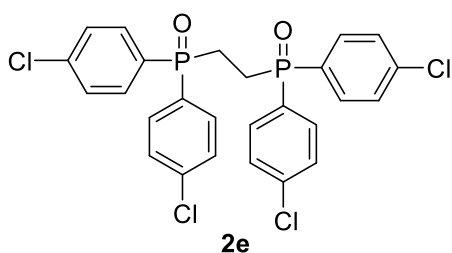

White solid, 53.5 mg, 63% yield, m.p. 228-231 °C. <sup>1</sup>H NMR (500 MHz, CDCl<sub>3</sub>) δ 7.62 (td, *J* = 8.3, 6.1 Hz, 8H), 7.45 (d, *J* = 8.1 Hz, 8H), 2.46 (s, 4H). <sup>13</sup>C NMR (126 MHz, CDCl<sub>3</sub>) δ 139.14, 132.05 (t, *J* = 5.2 Hz), 129.81 (d, *J* = 100.8 Hz), 129.41 (t, *J* = 6.2 Hz), 24.04 – 20.36 (m). <sup>31</sup>P NMR (202 MHz, CDCl<sub>3</sub>) δ 31.29. HRMS (ESI) m/z: [M + H]<sup>+</sup> calcd for C<sub>26</sub>H<sub>21</sub>Cl<sub>4</sub>O<sub>2</sub>P<sub>2</sub><sup>+</sup> 566.9765; found 566.9767.

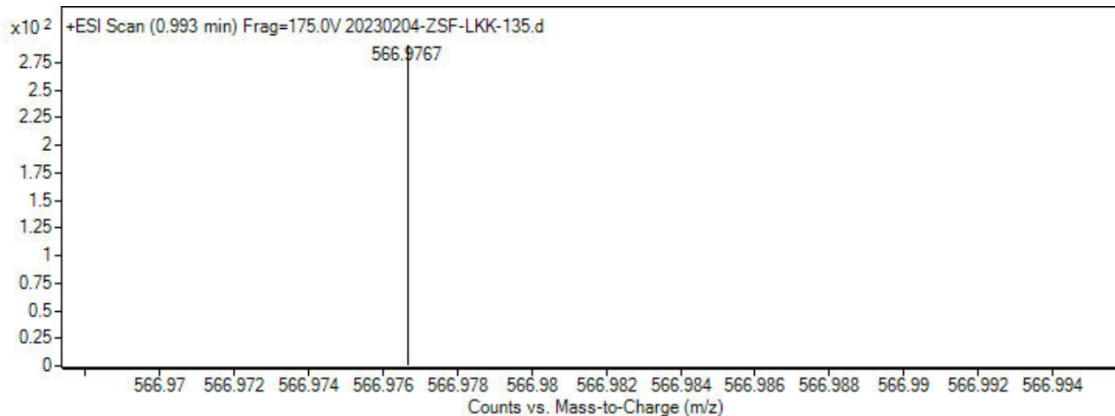

### ethane-1,2-diylbis(di-m-tolylphosphine oxide)

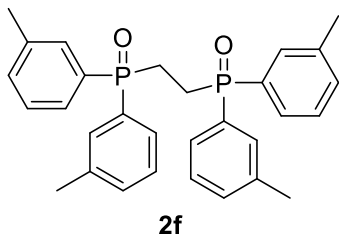

White solid, 35.4 mg, 49% yield, m.p. 150-152 °C. <sup>1</sup>H NMR (500 MHz, CDCl<sub>3</sub>) δ 7.56 (s, 4H), 7.46 (s, 4H), 7.32 (q, *J* = 7.8 Hz, 8H), 2.50 (s, 4H), 2.36 (s, 12H). <sup>13</sup>C NMR (126 MHz, CDCl<sub>3</sub>) δ 138.75 (t, *J* = 5.1 Hz), 132.81, 131.89 (d, *J* = 99.7 Hz), 131.27, 128.67 (t, *J* = 5.4 Hz), 127.72, 21.65 (d, *J* = 62.1 Hz), 21.40. <sup>31</sup>P NMR (202 MHz, CDCl<sub>3</sub>) δ 33.06. HRMS (ESI) m/z: [M + H]<sup>+</sup> calcd for C<sub>30</sub>H<sub>33</sub>O<sub>2</sub>P<sub>2</sub><sup>+</sup> 487.1950; found

487.1949.

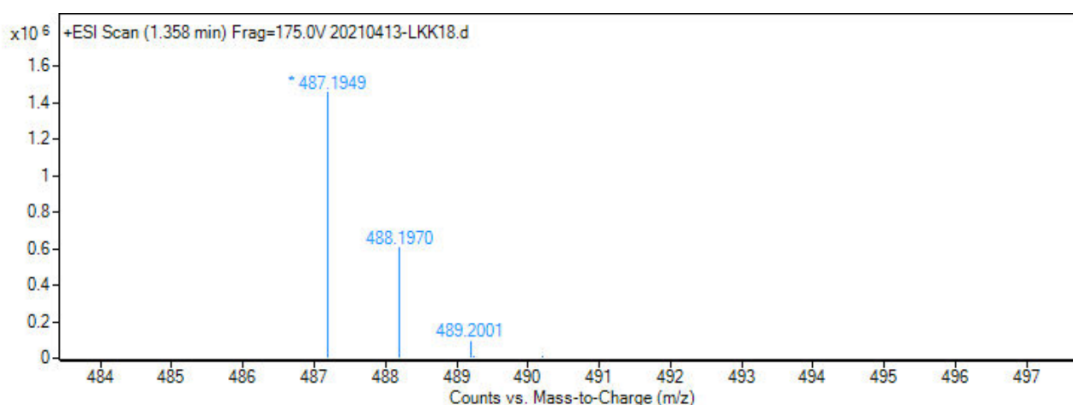

**ethane-1,2-diylbis(bis(3-fluorophenyl)phosphine oxide)**

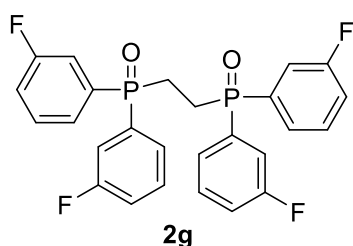

White solid, 42.1 mg, 56% yield. m.p. 150-152 °C. <sup>1</sup>H NMR (500 MHz, CDCl<sub>3</sub>) δ 7.44 (dd, *J* = 15.6, 13.5 Hz, 12H), 7.27 – 7.18 (m, 4H), 2.51 (s, 4H). <sup>13</sup>C NMR (126 MHz, CDCl<sub>3</sub>) δ 162.76 (dt, *J* = 252, 7.6 Hz), 133.78 (dd, *J* = 100.1, 5.4 Hz), 131.16 (dd, *J* = 14.0, 7.2 Hz), 126.27 (dd, *J* = 8.1, 4.2 Hz), 119.79 (d, *J* = 21.1 Hz), 117.84 (dt, *J* = 22.3, 4.9 Hz), 22.03 – 20.92 (m). <sup>31</sup>P NMR (202 MHz, CDCl<sub>3</sub>) δ 30.67. <sup>19</sup>F NMR (471 MHz, CDCl<sub>3</sub>) δ -109.79. HRMS (ESI) *m/z*: [M + H]<sup>+</sup> calcd for C<sub>26</sub>H<sub>21</sub>F<sub>4</sub>O<sub>2</sub>P<sub>2</sub><sup>+</sup> 503.0947; found 503.0942.

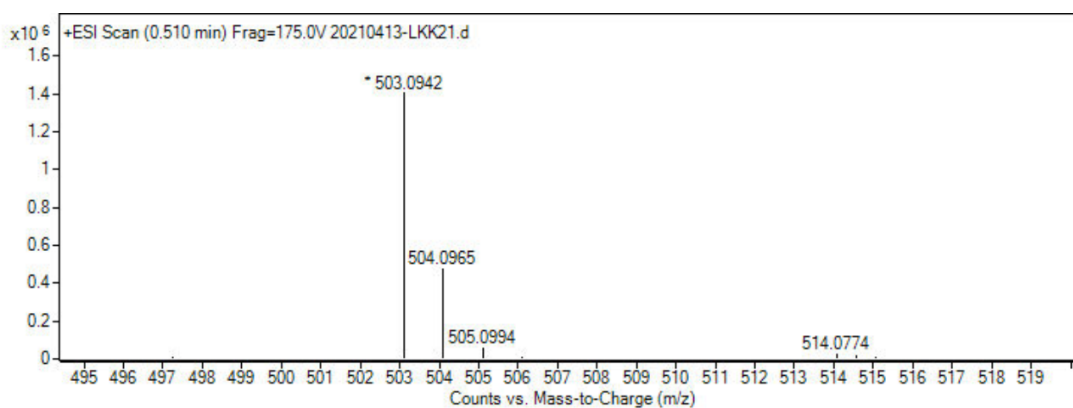

**ethane-1,2-diylbis(di(naphthalen-2-yl)phosphine oxide)**

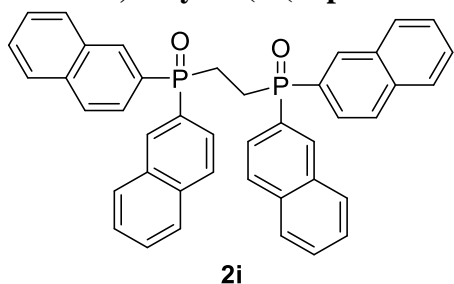

White solid, 50.9 mg, 54% yield, m.p. 155-157 °C <sup>1</sup>H NMR (500 MHz, CDCl<sub>3</sub>) δ 8.47 – 8.32 (m, 4H), 7.94 – 7.77 (m, 12H), 7.65 (s, 4H), 7.55 (dt, *J* = 14.6, 7.0 Hz, 8H), 2.80 (s, 4H). <sup>13</sup>C NMR (126 MHz, CDCl<sub>3</sub>) δ

134.75, 132.90, 132.54 (t,  $J = 6.3$  Hz), 128.95 (d,  $J = 99.9$  Hz), 128.93, 128.83 (t,  $J = 5.6$  Hz), 128.31, 127.83, 127.07, 125.46 (t,  $J = 4.8$  Hz), 22.09 – 20.99 (m).  $^{31}\text{P}$  NMR (202 MHz,  $\text{CDCl}_3$ )  $\delta$  33.09. HRMS (ESI)  $m/z$ :  $[\text{M} + \text{H}]^+$  calcd for  $\text{C}_{42}\text{H}_{33}\text{O}_2\text{P}_2^+$  631.1950; found 631.1945.

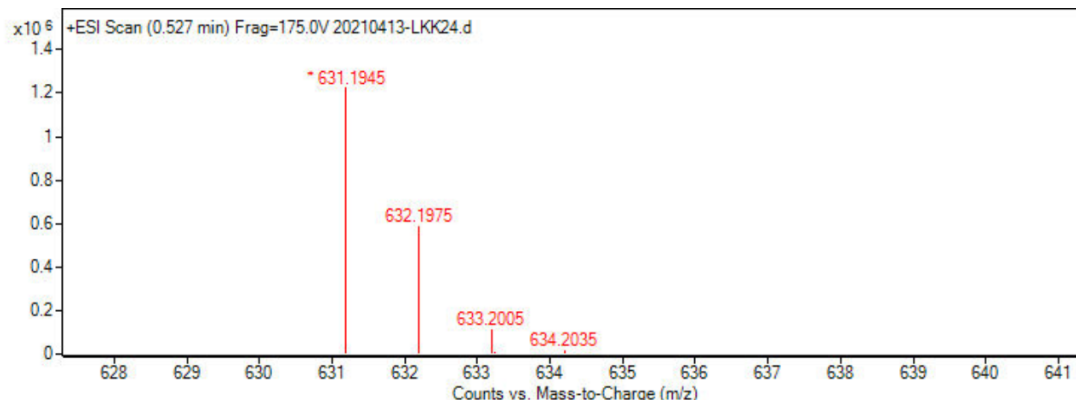

### ethane-1,2-diylbis(di(thiophen-2-yl)phosphine oxide)

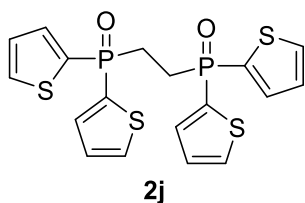

White solid, 81.4 mg, 30% yield, m.p. 124-126 °C.  $^1\text{H}$  NMR (500 MHz,  $\text{CDCl}_3$ )  $\delta$  7.78 – 7.69 (m, 4H), 7.58 (dd,  $J = 6.5, 3.3$  Hz, 4H), 7.19 (t,  $J = 4.1$  Hz, 4H), 2.61 (d,  $J = 2.2$  Hz, 4H).  $^{13}\text{C}$  NMR (126 MHz,  $\text{CDCl}_3$ )  $\delta$  135.75 (t,  $J = 5.2$  Hz), 133.94 (d,  $J = 2.4$  Hz), 133.29 – 131.94 (m), 128.61 (t,  $J = 7.2$  Hz), 26.73 – 25.54 (m).  $^{31}\text{P}$  NMR (202 MHz,  $\text{CDCl}_3$ )  $\delta$  21.85. HRMS (ESI)  $m/z$ :  $[\text{M} + \text{H}]^+$  calcd for  $\text{C}_{18}\text{H}_{17}\text{O}_2\text{P}_2\text{S}_4^+$  454.9581; found 454.9575.

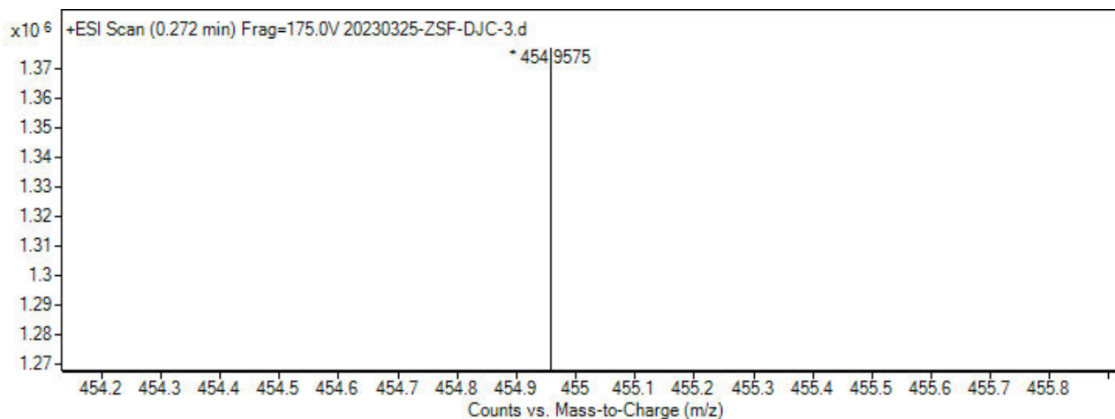

### ethane-1,2-diylbis((4-fluorophenyl)(phenyl)phosphine oxide)

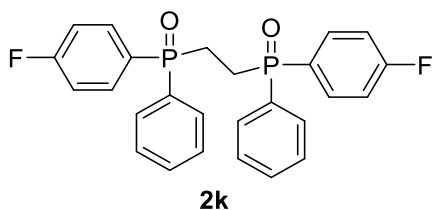

White solid, 31.2 mg, 42% yield, m.p. 130-133 °C.  $^1\text{H}$  NMR (500 MHz,  $\text{CDCl}_3$ )  $\delta$  7.70 (s, 8H), 7.54 (t,  $J = 7.2$  Hz, 2H), 7.47 (t,  $J = 7.1$  Hz, 4H), 7.15 (t,  $J = 7.5$  Hz, 4H), 2.51 (s, 4H).  $^{13}\text{C}$  NMR (126 MHz,  $\text{CDCl}_3$ )  $\delta$

165.13 (d,  $J = 253.7$  Hz), 133.38 – 133.22 (m), 132.28, 132.02 – 131.17 (m), 130.70 (t,  $J = 4.7$  Hz), 128.98 (t,  $J = 5.9$  Hz), 128.24 – 127.35 (m), 116.31 (dt,  $J = 21.3, 6.4$  Hz), 22.27 – 21.25 (m).  $^{31}\text{P}$  NMR (202 MHz,  $\text{CDCl}_3$ )  $\delta$  32.18.  $^{19}\text{F}$  NMR (376 MHz,  $\text{CDCl}_3$ )  $\delta$  -106.13. HRMS (ESI)  $m/z$ :  $[\text{M} + \text{H}]^+$  calcd for  $\text{C}_{26}\text{H}_{22}\text{F}_2\text{NaO}_2\text{P}_2^+$  489.0955; found 489.0946.

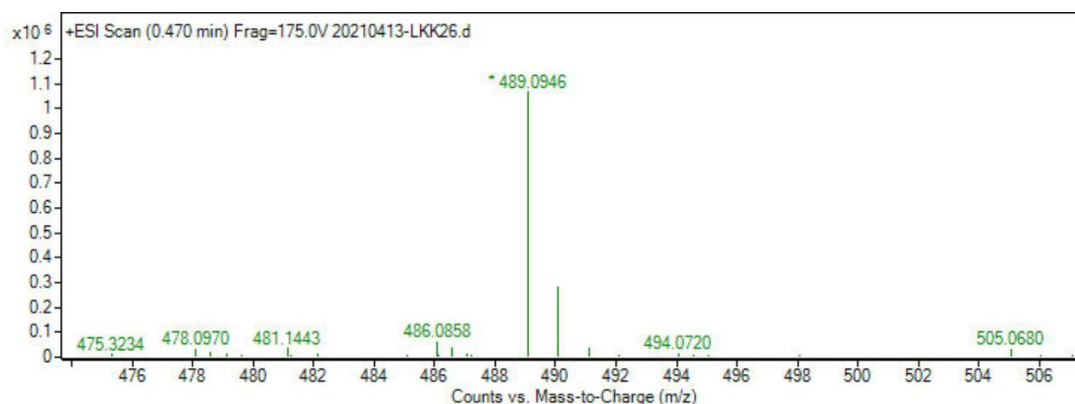

### ethane-1,2-diylbis((4-chlorophenyl)(phenyl)phosphine oxide)

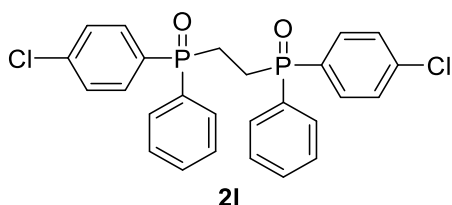

White solid, 38.4 mg, 52% yield, m.p. 221-223 °C.  $^1\text{H}$  NMR (500 MHz,  $\text{CDCl}_3$ )  $\delta$  7.77 – 7.58 (m, 8H), 7.54 (t,  $J = 7.2$  Hz, 2H), 7.46 (dd,  $J = 18.6, 7.7$  Hz, 8H), 2.49 (s, 4H).  $^{13}\text{C}$  NMR (126 MHz,  $\text{CDCl}_3$ )  $\delta$  138.83, 132.38, 132.20, 131.39 (d,  $J = 100.0$  Hz), 130.69, 129.27 (t,  $J = 5.7$  Hz), 129.03 (t,  $J = 5.4$  Hz), 22.21 – 20.81 (m).  $^{31}\text{P}$  NMR (202 MHz,  $\text{CDCl}_3$ )  $\delta$  32.00. HRMS (ESI)  $m/z$ :  $[\text{M} + \text{H}]^+$  calcd for  $\text{C}_{26}\text{H}_{23}\text{Cl}_2\text{O}_2\text{P}_2^+$  499.0545; found 499.0546.

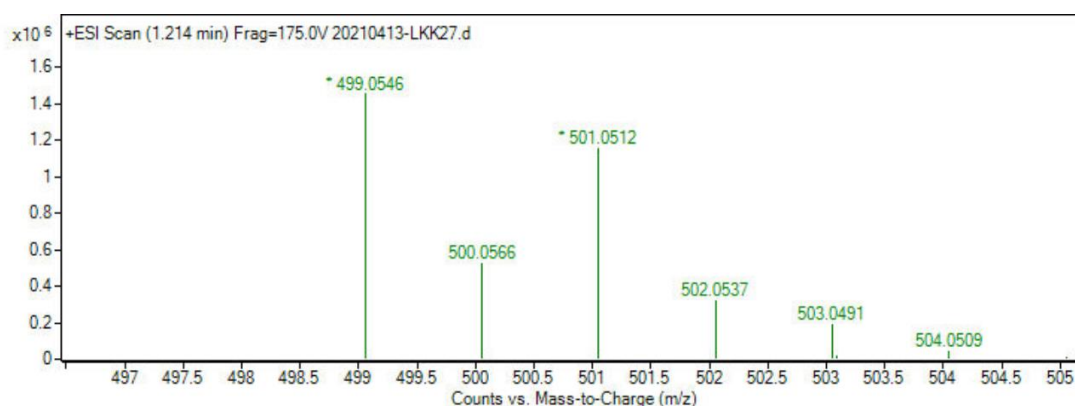

### ethane-1,2-diylbis([1,1'-biphenyl]-4-yl(phenyl)phosphine oxide)

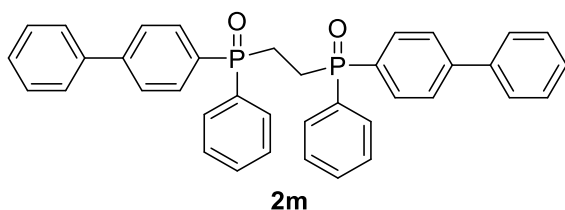

White solid, 50.3 mg, 58% yield, m.p. 115-116 °C.  $^1\text{H NMR}$  (500 MHz,  $\text{CDCl}_3$ )  $\delta$  7.77 (dt,  $J = 13.0, 7.3$  Hz, 8H), 7.66 (d,  $J = 7.3$  Hz, 4H), 7.59 – 7.50 (m, 6H), 7.45 (dt,  $J = 14.6, 7.4$  Hz, 8H), 7.37 (dd,  $J = 8.9, 5.6$  Hz, 2H), 2.59 (s, 4H).  $^{13}\text{C NMR}$  (126 MHz,  $\text{CDCl}_3$ )  $\delta$  144.92, 139.74, 132.12, 132.03 (d,  $J = 100.3$  Hz), 131.34 (t,  $J = 4.8$  Hz), 130.81 (t,  $J = 4.7$  Hz), 130.37 (d,  $J = 99.6$  Hz), 129.07 – 128.77 (m), 128.23, 127.53 (t,  $J = 6.0$  Hz), 127.25, 22.31 – 21.29 (m).  $^{31}\text{P NMR}$  (202 MHz,  $\text{CDCl}_3$ )  $\delta$  32.76. **HRMS** (ESI)  $m/z$ :  $[\text{M} + \text{H}]^+$  calcd for  $\text{C}_{38}\text{H}_{33}\text{O}_2\text{P}_2^+$  583.1950; found 583.1951.

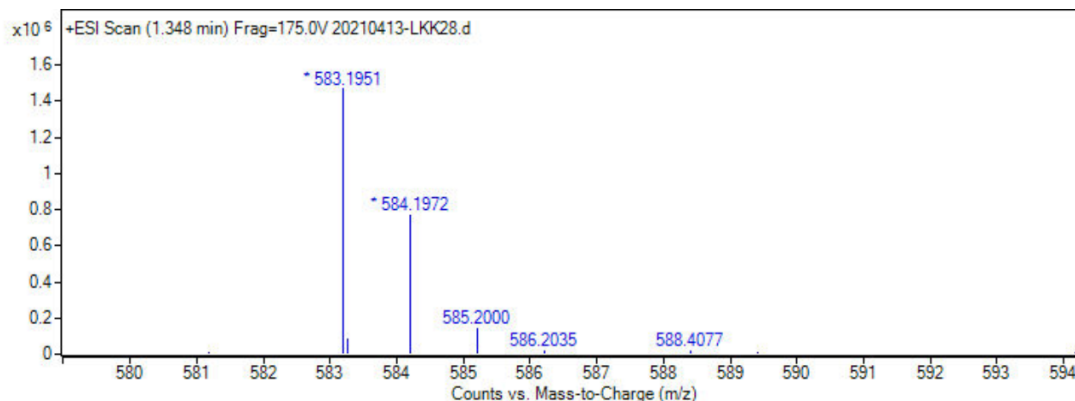

### ethane-1,2-diylbis(naphthalen-2-yl(phenyl)phosphine oxide)

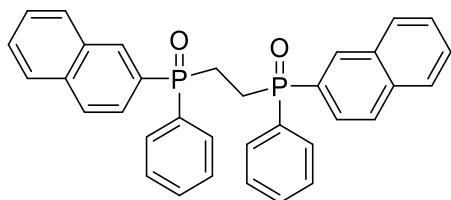

**2n**

White solid, 43.5 mg, 55% yield, m.p. 148-150 °C.  $^1\text{H NMR}$  (500 MHz,  $\text{CDCl}_3$ )  $\delta$  8.37 (d,  $J = 12.3$  Hz, 2H), 7.87 (ddd,  $J = 21.5, 14.9, 7.9$  Hz, 6H), 7.74 (s, 4H), 7.66 – 7.38 (m, 12H), 2.68 (d,  $J = 13.4$  Hz, 4H).  $^{13}\text{C NMR}$  (126 MHz,  $\text{CDCl}_3$ )  $\delta$  134.74 (d,  $J = 3.8$  Hz), 132.95 (t,  $J = 4.1$  Hz), 132.60 – 132.44 (m), 132.13 (d,  $J = 2.5$  Hz), 131.67 (d,  $J = 7.7$  Hz), 130.83 – 130.74 (m), 129.09 (d,  $J = 10.2$  Hz), 128.95 – 128.75 (m), 128.34 (d,  $J = 3.6$  Hz), 127.84 (d,  $J = 3.0$  Hz), 127.10 (d,  $J = 3.3$  Hz), 125.41 (q,  $J = 5.5$  Hz), 22.15 – 21.14 (m).  $^{31}\text{P NMR}$  (202 MHz,  $\text{CDCl}_3$ )  $\delta$  33.06. **HRMS** (ESI)  $m/z$ :  $[\text{M} + \text{H}]^+$  calcd for  $\text{C}_{34}\text{H}_{29}\text{O}_2\text{P}_2^+$  531.1637; found 531.1631.

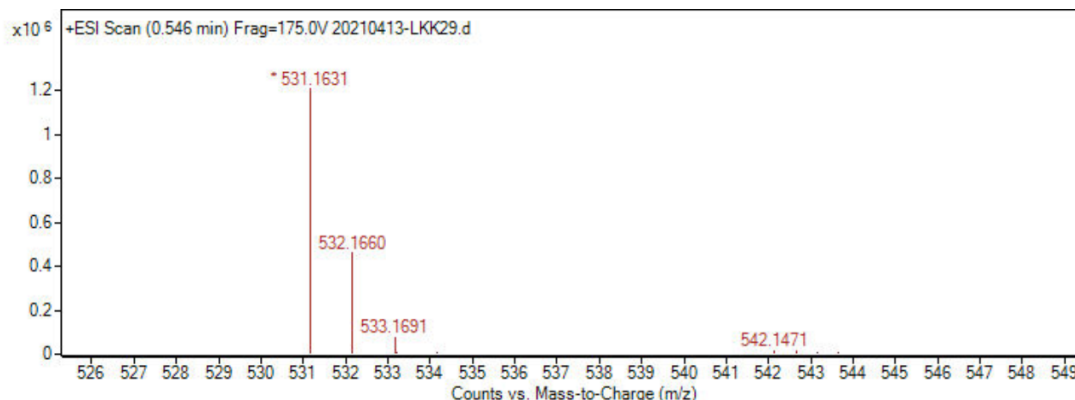

### ethane-1,2-diylbis(phenyl(thiophen-2-yl)phosphine oxide)

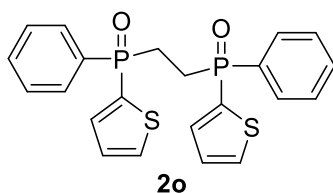

White solid, 42.3 mg, 64% yield, m.p. 147-150 °C.  $^1\text{H NMR}$  (500 MHz,  $\text{CDCl}_3$ )  $\delta$  7.82 – 7.66 (m, 6H), 7.61 – 7.41 (m, 8H), 7.18 (dt,  $J = 11.4, 4.0$  Hz, 2H), 2.70 – 2.41 (m, 4H).  $^{13}\text{C NMR}$  (126 MHz,  $\text{CDCl}_3$ )  $\delta$  135.54 (q,  $J = 4.8$  Hz), 133.63 (t,  $J = 1.9$  Hz), 132.71 (d,  $J = 107.8$  Hz), 132.43 (d,  $J = 3.5$  Hz), 131.66 (d,  $J = 106.4$  Hz), 130.68 (dd,  $J = 9.1, 4.7$  Hz), 128.91 (dd,  $J = 9.9, 6.1$  Hz), 128.55 (td,  $J = 6.8, 3.2$  Hz), 24.56 – 23.40 (m).  $^{31}\text{P NMR}$  (202 MHz,  $\text{CDCl}_3$ )  $\delta$  27.56. **HRMS** (ESI)  $m/z$ :  $[\text{M} + \text{H}]^+$  calcd for  $\text{C}_{22}\text{H}_{21}\text{O}_2\text{P}_2\text{S}_2^+$  443.0453; found 443.0461.

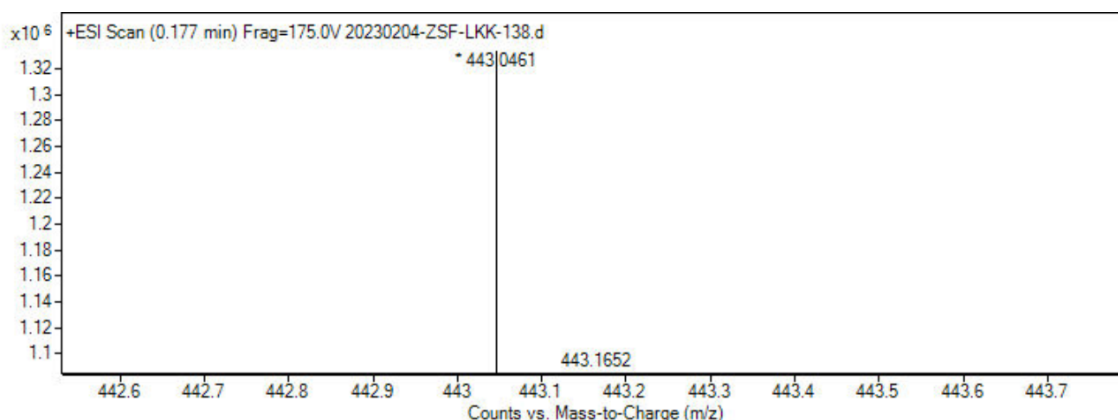

### diphenyl(2-(tetrahydrofuran-2-yl)ethyl)phosphine oxide

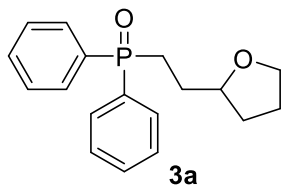

White solid, 63.6 mg, 71% yield, m.p. 93-95 °C.  $^1\text{H NMR}$  (500 MHz,  $\text{CDCl}_3$ )  $\delta$  7.75 (dd,  $J = 12.8, 4.7$  Hz, 4H), 7.54 – 7.39 (m, 6H), 3.86 (td,  $J = 11.7, 7.2$  Hz, 1H), 3.80 (dd,  $J = 14.8, 7.0$  Hz, 1H), 3.70 (dd,  $J = 14.7, 7.4$  Hz, 1H), 2.52 (td,  $J = 15.0, 4.3$  Hz, 1H), 2.28 (qd,  $J = 12.4, 4.2$  Hz, 1H), 1.96 (dt,  $J = 12.4, 6.5$  Hz, 1H), 1.91 – 1.79 (m, 3H), 1.77 – 1.66 (m, 1H), 1.50 – 1.38 (m, 1H).  $^{13}\text{C NMR}$  (126 MHz,  $\text{CDCl}_3$ )  $\delta$  132.96 (dd,  $J = 98.4, 46.8$  Hz), 131.68 (d,  $J = 2.3$  Hz), 130.77 (dd,  $J = 14.1, 9.2$  Hz), 128.63 (d,  $J = 12.2$  Hz), 79.15 (d,  $J = 14.8$  Hz), 67.69, 31.01, 27.31 (d,  $J = 3.3$  Hz), 26.51 (d,  $J = 72.9$  Hz), 25.64.  $^{31}\text{P NMR}$  (202 MHz,  $\text{CDCl}_3$ )  $\delta$  33.02. **HRMS** (ESI)  $m/z$ :  $[\text{M} + \text{Na}]^+$  calcd for  $\text{C}_{18}\text{H}_{21}\text{NaO}_2\text{P}^+$  323.1171; found 323.1169.

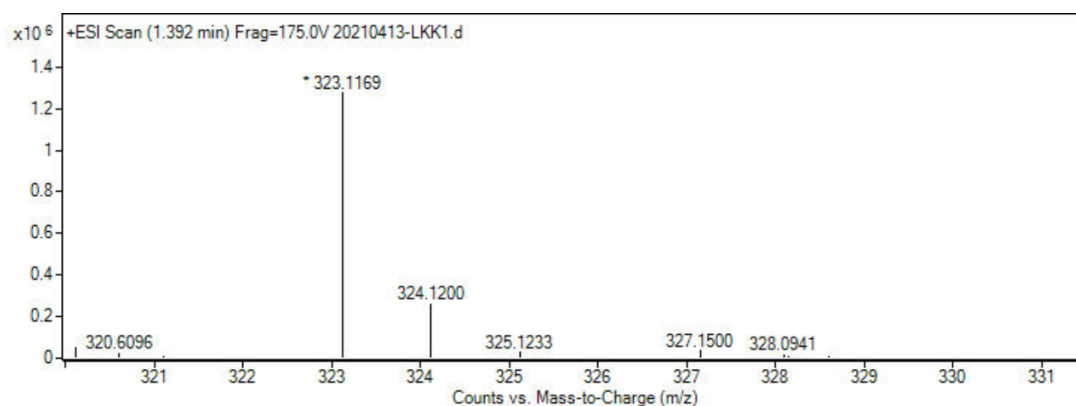

### (2-(tetrahydrofuran-2-yl)ethyl)di-p-tolylphosphine oxide

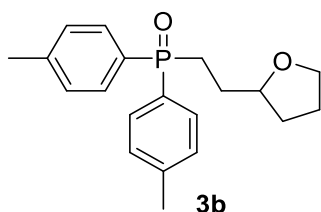

Colorless liquid, 55.0 mg, 56% yield.  $^1\text{H NMR}$  (500 MHz,  $\text{CDCl}_3$ )  $\delta$  7.62 (t,  $J = 8.2$  Hz, 4H), 7.26 (t,  $J = 8.4$  Hz, 4H), 3.79 (ddq,  $J = 51.3, 22.0, 7.3$  Hz, 3H), 2.47 (td,  $J = 14.9, 4.4$  Hz, 1H), 2.38 (s, 6H), 2.29 – 2.16 (m, 1H), 1.96 (dt,  $J = 12.4, 6.6$  Hz, 1H), 1.91 – 1.76 (m, 3H), 1.75 – 1.63 (m, 1H), 1.45 (td,  $J = 15.6, 7.7$  Hz, 1H).  $^{13}\text{C NMR}$  (126 MHz,  $\text{CDCl}_3$ )  $\delta$  141.99 (d,  $J = 2.6$  Hz), 130.78 (dd,  $J = 14.4, 9.6$  Hz), 130.25 (dd,  $J = 99.8, 49.7$  Hz), 129.32 (dd,  $J = 12.0, 2.2$  Hz), 79.27 (d,  $J = 14.9$  Hz), 67.70, 31.03, 27.40 (d,  $J = 3.5$  Hz), 26.67 (d,  $J = 73.1$  Hz), 25.66, 21.54.  $^{31}\text{P NMR}$  (202 MHz,  $\text{CDCl}_3$ )  $\delta$  33.08. **HRMS** (ESI)  $m/z$ :  $[\text{M} + \text{Na}]^+$  calcd for  $\text{C}_{20}\text{H}_{25}\text{NaO}_2\text{P}^+$  351.1484; found 351.1482.

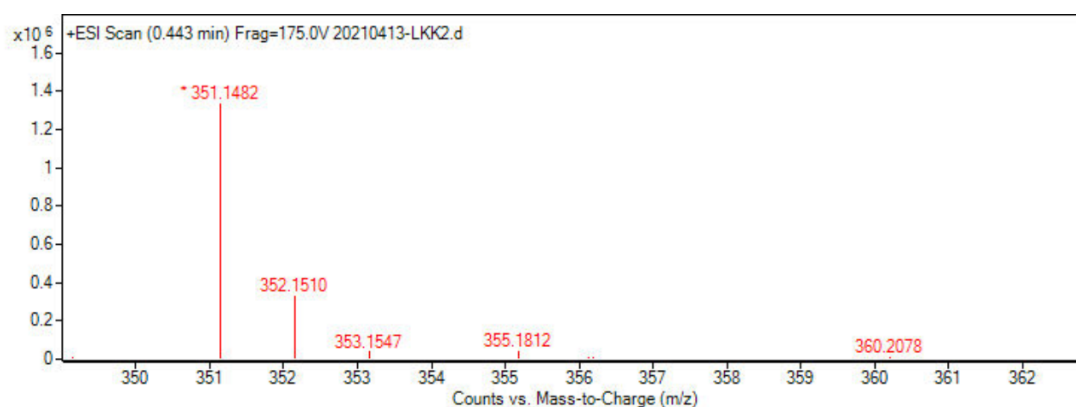

### bis(4-methoxyphenyl)(2-(tetrahydrofuran-2-yl)ethyl)phosphine oxide

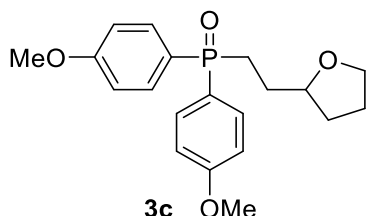

Colorless liquid, 47.8 mg, 44% yield.  $^1\text{H NMR}$  (500 MHz,  $\text{CDCl}_3$ )  $\delta$  7.76 – 7.55 (m, 4H), 6.96 (ddd,  $J = 8.8, 3.1, 2.3$  Hz, 4H), 3.88 – 3.77 (m, 8H), 3.70 (dd,  $J = 15.0, 7.1$  Hz, 1H), 2.44 (dddd,  $J = 15.0, 12.3, 10.7, 4.5$  Hz, 1H), 2.27 – 2.15 (m, 1H), 1.96 (ddd,  $J = 12.1, 10.2, 6.3$  Hz, 1H), 1.90 – 1.78 (m, 3H), 1.75 – 1.64 (m, 1H), 1.45 (ddd,  $J = 15.6, 12.1, 7.5$  Hz, 1H).  $^{13}\text{C NMR}$  (126 MHz,  $\text{CDCl}_3$ )  $\delta$  162.18 (d,  $J = 2.8$  Hz), 132.58 (dd,  $J = 14.3, 10.6$  Hz), 124.41 (dd,  $J = 104.9, 51.2$  Hz), 114.14 (dd,  $J = 12.6, 2.3$  Hz), 79.24 (d,  $J = 15.0$  Hz), 67.68, 55.29, 31.02, 27.47 (d,  $J = 3.5$  Hz), 26.92 (d,  $J = 73.8$  Hz), 25.65.  $^{31}\text{P NMR}$  (202 MHz,  $\text{CDCl}_3$ )  $\delta$  32.88. **HRMS** (ESI)  $m/z$ :  $[\text{M} + \text{H}]^+$  calcd for  $\text{C}_{20}\text{H}_{26}\text{O}_4\text{P}^+$  361.1563; found 361.1565.

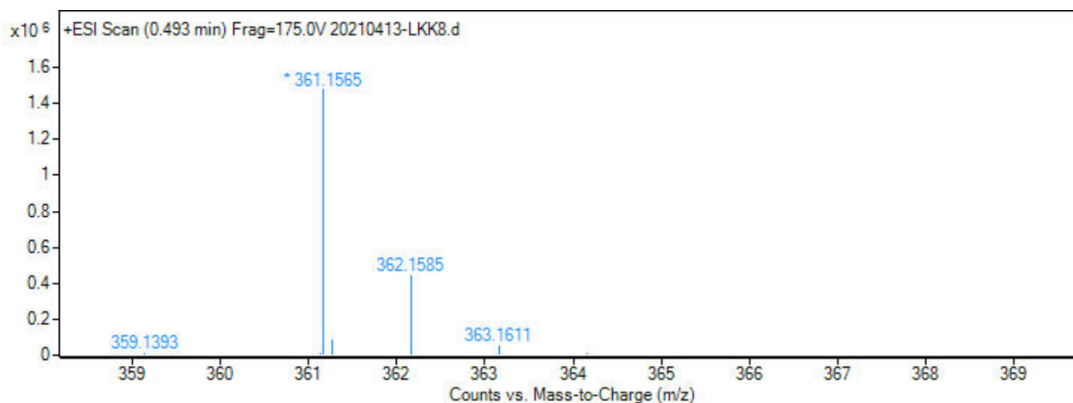

### bis(4-fluorophenyl)(2-(tetrahydrofuran-2-yl)ethyl)phosphine oxide

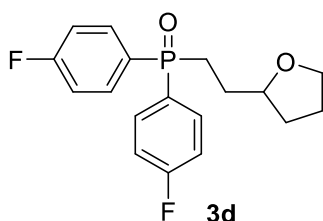

Colorless liquid, 44.1 mg, 44% yield.  $^1\text{H NMR}$  (500 MHz,  $\text{CDCl}_3$ )  $\delta$  7.82 – 7.63 (m, 4H), 7.17 (tdd,  $J = 8.6, 3.6, 2.0$  Hz, 4H), 3.91 – 3.76 (m, 2H), 3.70 (dd,  $J = 15.1, 7.1$  Hz, 1H), 2.55 – 2.45 (m, 1H), 2.26 (dtd,  $J = 16.5, 12.2, 4.4$  Hz, 1H), 1.98 (dt,  $J = 12.4, 6.5$  Hz, 1H), 1.91 – 1.80 (m, 3H), 1.67 (tdd,  $J = 13.7, 8.4, 4.2$  Hz, 1H), 1.45 (ddd,  $J = 15.5, 12.2, 7.7$  Hz, 1H).  $^{13}\text{C NMR}$  (126 MHz,  $\text{CDCl}_3$ )  $\delta$  164.98 (d,  $J = 250.3$  Hz), 133.36 – 133.07 (m) 128.69 (ddd,  $J = 101.7, 53.9, 3.4$  Hz), 116.14 (ddd,  $J = 21.3, 12.8, 2.7$  Hz), 79.01 (d,  $J = 14.8$  Hz), 67.75, 31.06, 27.29 (d,  $J = 3.6$  Hz), 26.72 (d,  $J = 73.8$  Hz), 25.67.  $^{31}\text{P NMR}$  (202 MHz,  $\text{CDCl}_3$ )  $\delta$  31.89.  $^{19}\text{F NMR}$  (471 MHz,  $\text{CDCl}_3$ )  $\delta$  -106.66. **HRMS** (ESI)  $m/z$ :  $[\text{M} + \text{H}]^+$  calcd for  $\text{C}_{18}\text{H}_{20}\text{F}_2\text{O}_2\text{P}^+$  337.1163; found 337.1155.

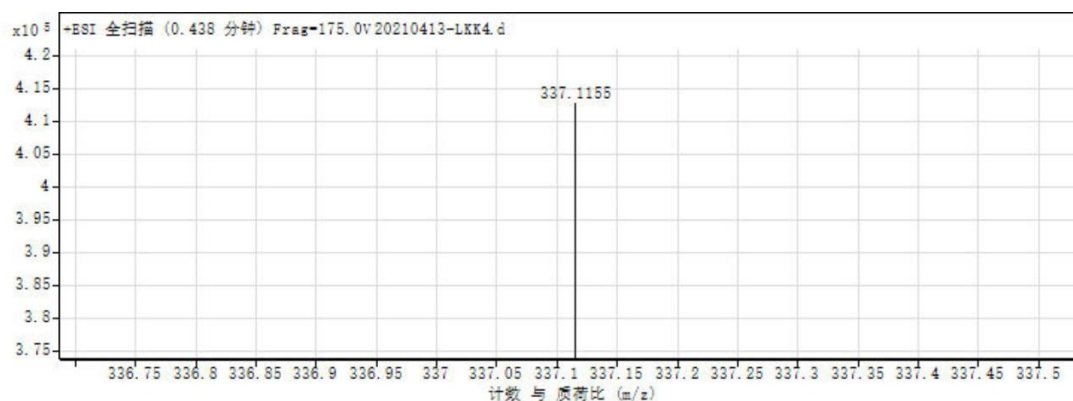

### bis(4-chlorophenyl)(2-(tetrahydrofuran-2-yl)ethyl)phosphine oxide

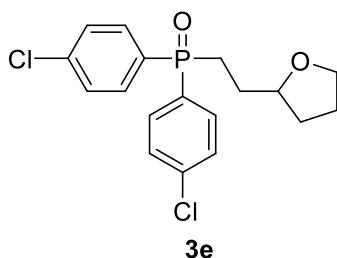

Colorless liquid, 59.7 mg, 54% yield.  $^1\text{H NMR}$  (500 MHz,  $\text{CDCl}_3$ )  $\delta$  7.71 – 7.61 (m, 4H), 7.46 (ddd,  $J = 8.3,$



3.6, 2.2 Hz, 4H), 3.85 (ddd,  $J = 10.9, 7.1, 3.7$  Hz, 1H), 3.80 (dd,  $J = 15.1, 6.9$  Hz, 1H), 3.70 (dd,  $J = 15.1, 7.1$  Hz, 1H), 2.54 – 2.46 (m, 1H), 2.33 – 2.19 (m, 1H), 1.97 (dt,  $J = 12.4, 6.5$  Hz, 1H), 1.90 – 1.81 (m, 3H), 1.66 (dddd,  $J = 21.6, 12.9, 8.5, 4.4$  Hz, 1H), 1.45 (ddd,  $J = 15.5, 12.2, 7.7$  Hz, 1H).  $^{13}\text{C}$  NMR (126 MHz,  $\text{CDCl}_3$ )  $\delta$  138.59 (d,  $J = 3.4$  Hz), 132.12 (dd,  $J = 15.2, 10.2$  Hz), 131.02 (dd,  $J = 99.8, 50.2$  Hz), 129.15 (dd,  $J = 12.1, 2.7$  Hz), 78.93 (d,  $J = 14.7$  Hz), 67.75, 31.06, 27.21 (d,  $J = 3.6$  Hz), 26.37 (d,  $J = 73.7$  Hz), 25.66.  $^{31}\text{P}$  NMR (202 MHz,  $\text{CDCl}_3$ )  $\delta$  32.17. HRMS (ESI)  $m/z$ :  $[\text{M} + \text{H}]^+$  calcd for  $\text{C}_{18}\text{H}_{20}\text{Cl}_2\text{O}_2\text{P}^+$  369.0572; found 369.0564.

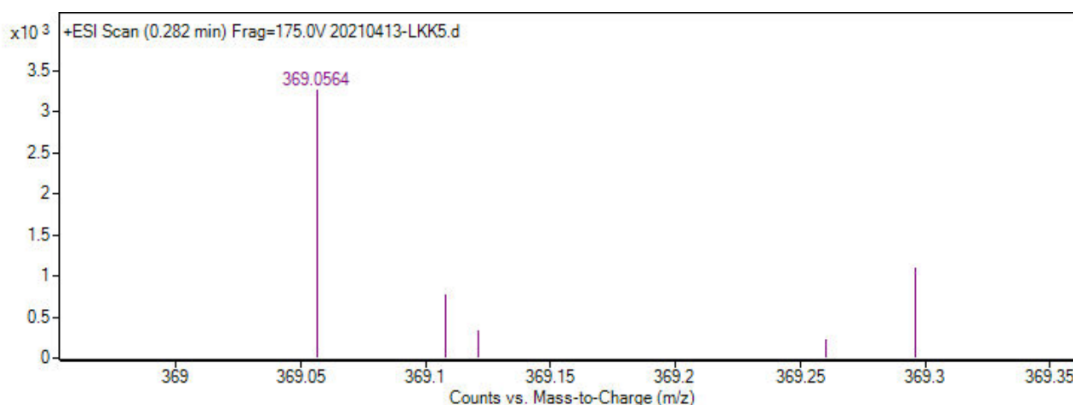

### di([1,1'-biphenyl]-4-yl)(2-(tetrahydrofuran-2-yl)ethyl)phosphine oxide

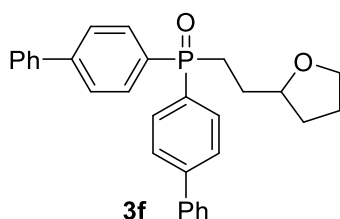

White solid, 57.6 mg, 43% yield, m.p. 168-170 °C.  $^1\text{H}$  NMR (500 MHz,  $\text{CDCl}_3$ )  $\delta$  7.85 (ddd,  $J = 11.0, 8.3, 2.7$  Hz, 4H), 7.69 (dt,  $J = 8.0, 2.7$  Hz, 4H), 7.59 (dd,  $J = 7.4, 1.6$  Hz, 4H), 7.45 (t,  $J = 7.6$  Hz, 4H), 7.38 (t,  $J = 7.2$  Hz, 2H), 3.90 (td,  $J = 11.5, 7.3$  Hz, 1H), 3.83 (dd,  $J = 14.9, 6.9$  Hz, 1H), 3.71 (dd,  $J = 14.8, 7.4$  Hz, 1H), 2.66 – 2.52 (m, 1H), 2.40 – 2.29 (m, 1H), 2.02 – 1.74 (m, 5H), 1.48 (ddd,  $J = 15.7, 12.2, 7.6$  Hz, 1H).  $^{13}\text{C}$  NMR (126 MHz,  $\text{CDCl}_3$ )  $\delta$  144.52 (d,  $J = 2.1$  Hz), 139.94, 131.66 (dd,  $J = 99.7, 48.2$  Hz), 131.33 (dd,  $J = 14.4, 9.6$  Hz), 128.94, 128.12, 127.37 (dd,  $J = 11.9, 1.8$  Hz), 127.25, 79.25 (d,  $J = 14.9$  Hz), 67.77, 31.09, 27.44 (d,  $J = 3.5$  Hz), 26.73 (d,  $J = 73.2$  Hz), 25.71.  $^{31}\text{P}$  NMR (202 MHz,  $\text{CDCl}_3$ )  $\delta$  32.66. HRMS (ESI)  $m/z$ :  $[\text{M} + \text{H}]^+$  calcd for  $\text{C}_{30}\text{H}_{30}\text{O}_2\text{P}^+$  453.1978; found 453.1968.

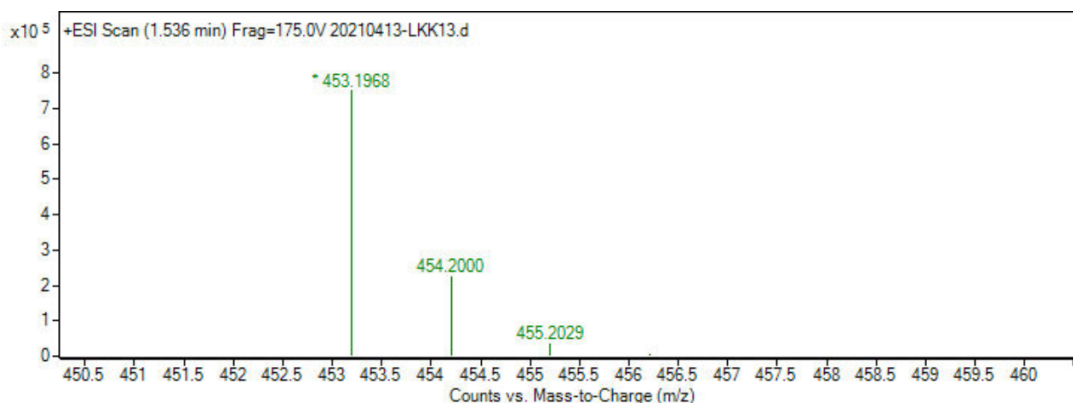

### (2-(tetrahydrofuran-2-yl)ethyl)di-m-tolylphosphine oxide

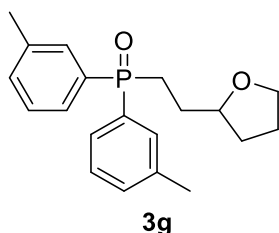

Colorless liquid, 59.3 mg, 60% yield.  $^1\text{H NMR}$  (500 MHz,  $\text{CDCl}_3$ )  $\delta$  7.61 (d,  $J = 9.9$  Hz, 2H), 7.54 – 7.42 (m, 2H), 7.38 – 7.27 (m, 4H), 3.94 – 3.62 (m, 3H), 2.50 (ddd,  $J = 22.0, 15.0, 4.3$  Hz, 1H), 2.37 (s, 6H), 2.25 (td,  $J = 15.9, 4.0$  Hz, 1H), 1.97 (dt,  $J = 12.4, 6.6$  Hz, 1H), 1.92 – 1.77 (m, 3H), 1.71 (dq,  $J = 12.8, 8.1$  Hz, 1H), 1.46 (td,  $J = 15.5, 7.6$  Hz, 1H).  $^{13}\text{C NMR}$  (126 MHz,  $\text{CDCl}_3$ )  $\delta$  138.48 (dd,  $J = 11.5, 2.2$  Hz), 132.84 (dd,  $J = 98.0, 50.4$  Hz), 132.43 (d,  $J = 2.7$  Hz), 131.33 (dd,  $J = 16.4, 8.9$  Hz), 128.45 (dd,  $J = 12.3, 1.4$  Hz), 127.67 (dd,  $J = 13.4, 9.6$  Hz), 79.26 (d,  $J = 14.9$  Hz), 67.69, 31.04, 27.33 (d,  $J = 3.5$  Hz), 26.53 (d,  $J = 72.7$  Hz), 25.65, 21.41.  $^{31}\text{P NMR}$  (202 MHz,  $\text{CDCl}_3$ )  $\delta$  32.99. **HRMS** (ESI)  $m/z$ :  $[\text{M} + \text{H}]^+$  calcd for  $\text{C}_{20}\text{H}_{26}\text{O}_2\text{P}^+$  329.1665; found 329.1661.

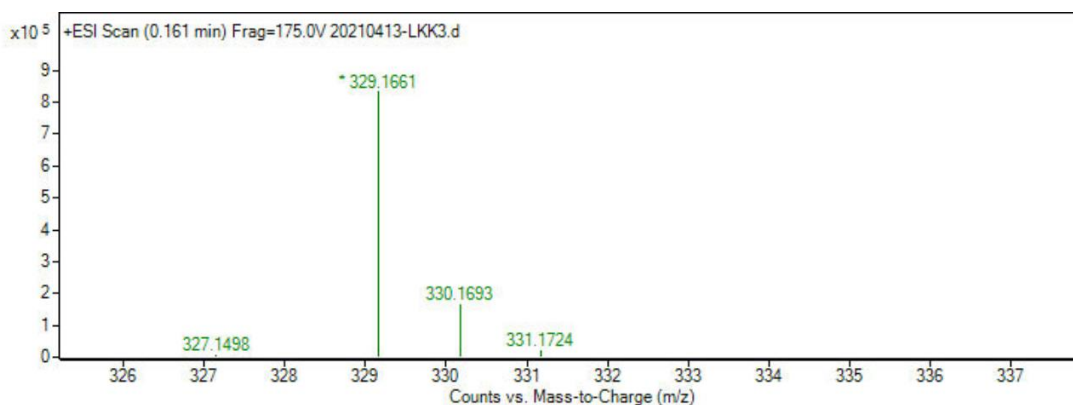

### bis(3-fluorophenyl)(2-(tetrahydrofuran-2-yl)ethyl)phosphine oxide

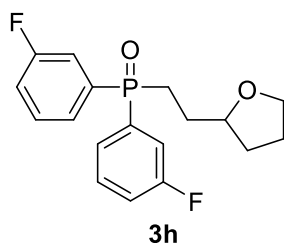

Colorless liquid, 50.2 mg, 50% yield.  $^1\text{H NMR}$  (500 MHz,  $\text{CDCl}_3$ )  $\delta$  7.56 – 7.40 (m, 6H), 7.22 (t,  $J = 8.3$  Hz, 2H), 3.91 – 3.77 (m, 2H), 3.71 (dd,  $J = 15.1, 7.1$  Hz, 1H), 2.58 – 2.47 (m, 1H), 2.28 (dtd,  $J = 16.5, 12.2, 4.5$  Hz, 1H), 1.99 (dt,  $J = 12.4, 6.5$  Hz, 1H), 1.93 – 1.82 (m, 3H), 1.75 – 1.64 (m, 1H), 1.46 (ddd,  $J = 15.5, 12.2, 7.7$  Hz, 1H).  $^{13}\text{C NMR}$  (126 MHz,  $\text{CDCl}_3$ )  $\delta$  162.69 (ddd,  $J = 250.9, 16.4, 3.0$  Hz), 135.22 (ddd,  $J = 97.5, 46.8, 5.5$  Hz), 130.80 (ddd,  $J = 13.7, 7.4, 1.7$  Hz), 126.36 (ddd,  $J = 14.7, 8.9, 3.1$  Hz), 119.16 (dd,  $J = 21.1, 2.0$  Hz), 117.73 (ddd,  $J = 22.5, 15.0, 10.1$  Hz), 78.92 (d,  $J = 14.8$  Hz), 67.75, 31.06, 27.18 (d,  $J = 3.7$  Hz), 26.32 (d,  $J = 73.7$  Hz), 25.66.  $^{31}\text{P NMR}$  (202 MHz,  $\text{CDCl}_3$ )  $\delta$  31.19.  $^{19}\text{F NMR}$  (471 MHz,  $\text{CDCl}_3$ )  $\delta$  -110.57 (d,  $J = 4.8$  Hz). **HRMS** (ESI)  $m/z$ :  $[\text{M} + \text{H}]^+$  calcd for  $\text{C}_{18}\text{H}_{20}\text{F}_2\text{O}_2\text{P}^+$  337.1163; found 337.1165.

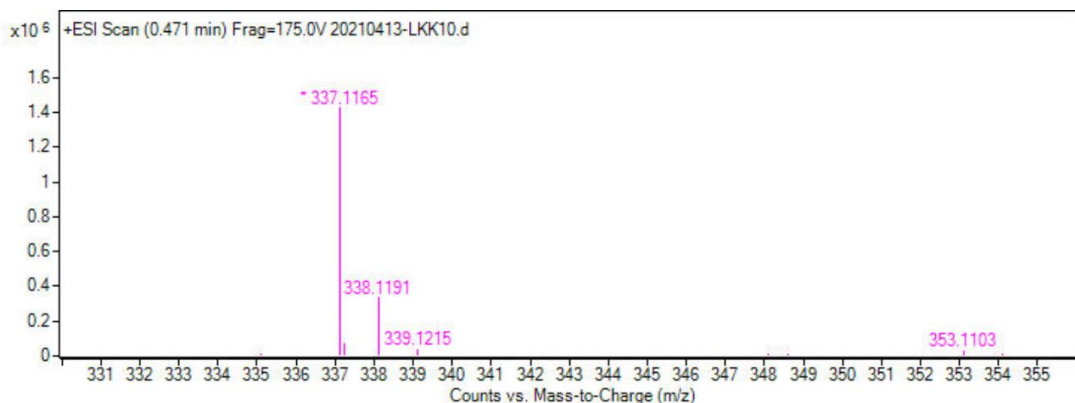

### bis(3,5-dimethylphenyl)(2-(tetrahydrofuran-2-yl)ethyl)phosphine oxide

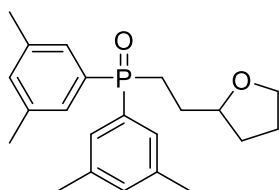

**3i**

White solid, 39.3 mg, 37% yield, m.p. 70-73 °C. <sup>1</sup>H NMR (500 MHz, CDCl<sub>3</sub>) δ 7.35 (d, *J* = 11.7 Hz, 4H), 7.11 (s, 2H), 3.87 (td, *J* = 11.5, 7.1 Hz, 1H), 3.81 (dd, *J* = 15.0, 6.9 Hz, 1H), 3.71 (dd, *J* = 14.6, 7.5 Hz, 1H), 2.48 (dddd, *J* = 14.8, 12.3, 10.5, 4.4 Hz, 1H), 2.33 (d, *J* = 1.9 Hz, 12H), 2.26 – 2.17 (m, 1H), 1.97 (ddd, *J* = 12.2, 10.2, 6.4 Hz, 1H), 1.90 – 1.79 (m, 3H), 1.75 – 1.64 (m, 1H), 1.46 (ddd, *J* = 15.6, 12.2, 7.5 Hz, 1H). <sup>13</sup>C NMR (126 MHz, CDCl<sub>3</sub>) δ 138.24 (dd, *J* = 12.2, 1.3 Hz), 133.32 (d, *J* = 1.8 Hz), 132.89 (dd, *J* = 97.6, 57.4 Hz), 128.29 (dd, *J* = 16.3, 9.3 Hz), 79.36 (d, *J* = 14.9 Hz), 67.66, 31.07, 27.35 (d, *J* = 3.5 Hz), 26.53 (d, *J* = 72.5 Hz), 25.65, 21.29. <sup>31</sup>P NMR (202 MHz, CDCl<sub>3</sub>) δ 32.96. HRMS (ESI) m/z: [M + H]<sup>+</sup> calcd for C<sub>22</sub>H<sub>30</sub>O<sub>2</sub>P<sup>+</sup> 357.1978; found 357.1974.

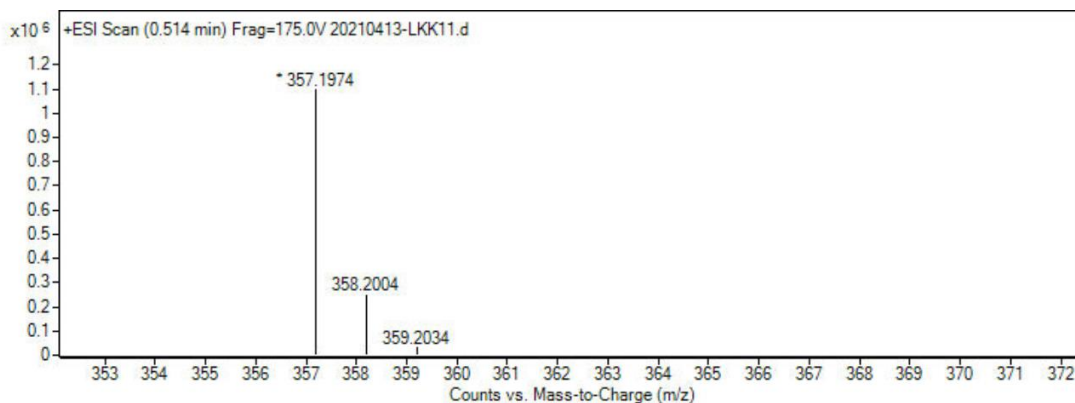

### di(naphthalen-2-yl)(2-(tetrahydrofuran-2-yl)ethyl)phosphine oxide

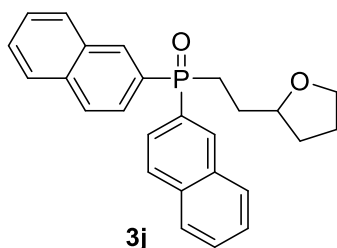

**3j**

Colorless liquid, 46.7 mg, 46% yield.  $^1\text{H NMR}$  (500 MHz,  $\text{CDCl}_3$ )  $\delta$  8.44 (dd,  $J = 13.2, 7.3$  Hz, 2H), 7.98 – 7.80 (m, 6H), 7.71 (t,  $J = 8.6$  Hz, 2H), 7.57 (td,  $J = 14.8, 7.1$  Hz, 4H), 3.91 (td,  $J = 11.1, 7.2$  Hz, 1H), 3.81 (dd,  $J = 15.0, 6.9$  Hz, 1H), 3.72 (dd,  $J = 15.0, 7.1$  Hz, 1H), 2.85 – 2.63 (m, 1H), 2.54 – 2.39 (m, 1H), 1.96 (tt,  $J = 8.4, 5.4$  Hz, 2H), 1.84 (dt,  $J = 13.6, 6.9$  Hz, 3H), 1.46 (ddd,  $J = 15.4, 12.3, 7.7$  Hz, 1H).  $^{13}\text{C NMR}$  (126 MHz,  $\text{CDCl}_3$ )  $\delta$  134.65 (d,  $J = 2.3$  Hz), 132.78 (dd,  $J = 24.1, 8.5$  Hz), 132.56 (d,  $J = 2.3$  Hz), 130.04 (dd,  $J = 99.0, 49.7$  Hz), 128.91, 128.58 (dd,  $J = 11.4, 2.4$  Hz), 128.13, 127.83, 126.97, 125.71 (dd,  $J = 10.2, 8.8$  Hz), 79.26 (d,  $J = 14.8$  Hz), 67.75, 31.13, 27.48 (d,  $J = 3.4$  Hz), 26.42 (d,  $J = 73.2$  Hz), 25.68.  $^{31}\text{P NMR}$  (202 MHz,  $\text{CDCl}_3$ )  $\delta$  33.19. **HRMS** (ESI)  $m/z$ :  $[\text{M} + \text{H}]^+$  calcd for  $\text{C}_{26}\text{H}_{26}\text{O}_2\text{P}^+$  401.1665; found 401.1658.

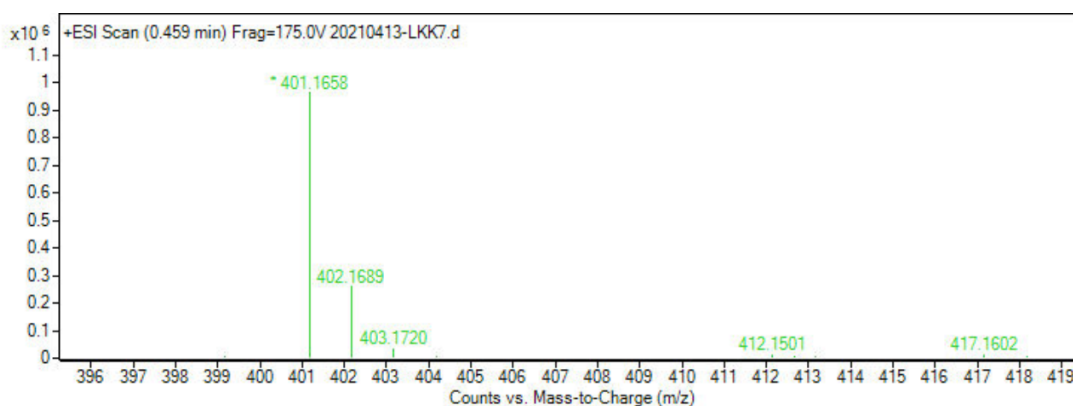

### (2-(tetrahydrofuran-2-yl)ethyl)di(thiophen-2-yl)phosphine oxide

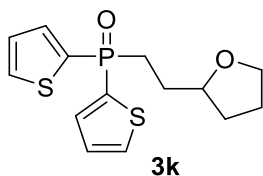

Colorless liquid, 41.4 mg, 22% yield.  $^1\text{H NMR}$  (400 MHz,  $\text{CDCl}_3$ )  $\delta$  7.72 (t,  $J = 4.4$  Hz, 2H), 7.61 (dd,  $J = 7.2, 3.6$  Hz, 2H), 7.20 (td,  $J = 3.5, 1.8$  Hz, 2H), 3.93 – 3.77 (m, 2H), 3.71 (dd,  $J = 14.6, 7.5$  Hz, 1H), 2.52 (dtd,  $J = 16.5, 11.9, 4.7$  Hz, 1H), 2.39 – 2.21 (m, 1H), 2.02 – 1.93 (m, 1H), 1.92 – 1.78 (m, 4H), 1.48 (ddd,  $J = 15.3, 12.0, 7.5$  Hz, 1H).  $^{13}\text{C NMR}$  (126 MHz,  $\text{CDCl}_3$ )  $\delta$  135.42 (t,  $J = 9.9$  Hz), 134.1 (dd,  $J = 113.4, 32.8$  Hz), 133.29 (t,  $J = 6.3$  Hz), 128.37 (d,  $J = 13.9$  Hz), 78.97 (d,  $J = 16.2$  Hz), 67.78, 31.07 (d,  $J = 3.3$  Hz), 30.77 (d,  $J = 80.7$  Hz), 27.54 (d,  $J = 3.7$  Hz), 25.67.  $^{31}\text{P NMR}$  (202 MHz,  $\text{CDCl}_3$ )  $\delta$  22.71. **HRMS** (ESI)  $m/z$ :  $[\text{M} + \text{H}]^+$  calcd for  $\text{C}_{14}\text{H}_{18}\text{O}_2\text{PS}_2^+$  313.0480; found 313.0488.

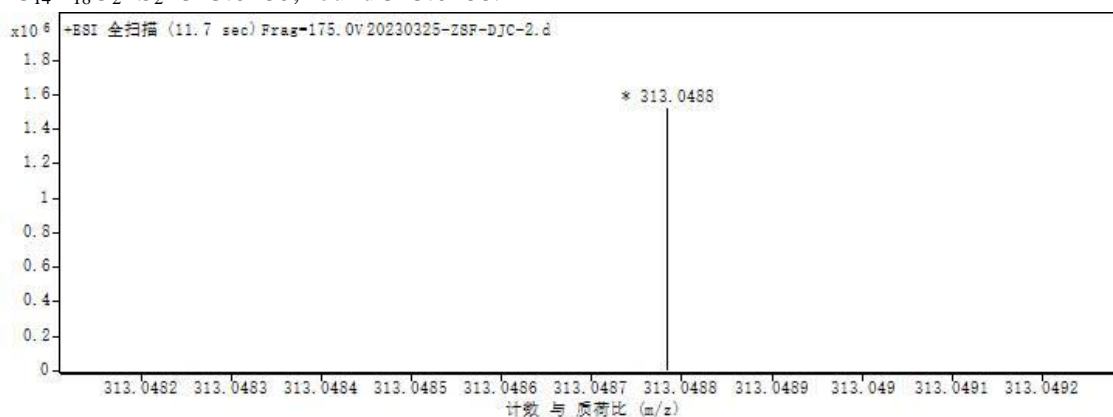

### (4-methoxyphenyl)(phenyl)(2-(tetrahydrofuran-2-yl)ethyl)phosphine oxide

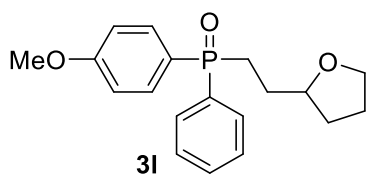

Colorless liquid, 40.6 mg, 41% yield.  $^1\text{H NMR}$  (500 MHz,  $\text{CDCl}_3$ )  $\delta$  7.70 (dddd,  $J = 22.7, 11.7, 5.8, 2.4$  Hz, 4H), 7.47 (tt,  $J = 8.2, 7.1$  Hz, 3H), 7.04 – 6.91 (m, 2H), 3.90 – 3.77 (m, 5H), 3.70 (dd,  $J = 14.7, 7.4$  Hz, 1H), 2.48 (ddd,  $J = 15.0, 13.6, 4.4$  Hz, 1H), 2.24 (ddd,  $J = 27.3, 12.4, 4.3$  Hz, 1H), 2.01 – 1.92 (m, 1H), 1.84 (dt,  $J = 12.3, 6.0$  Hz, 3H), 1.71 (tt,  $J = 11.9, 8.0, 4.0$  Hz, 1H), 1.51 – 1.39 (m, 1H).  $^{13}\text{C NMR}$  (126 MHz,  $\text{CDCl}_3$ )  $\delta$  162.32, 133.44 (dd,  $J = 99.0, 47.4$  Hz), 132.66 (dd,  $J = 14.5, 10.6$  Hz), 131.54 (d,  $J = 2.6$  Hz), 130.73 (dd,  $J = 14.6, 9.3$  Hz), 128.57 (d,  $J = 10.7$  Hz), 123.90 (dd,  $J = 104.4, 52.1$  Hz), 114.24 (dd,  $J = 12.7, 2.5$  Hz), 79.22 (dd,  $J = 14.8, 2.2$  Hz), 67.70, 55.31, 31.03 (d,  $J = 3.0$  Hz), 27.39 (t,  $J = 2.7$  Hz), 26.71 (dd,  $J = 73.4, 5.6$  Hz), 25.65.  $^{31}\text{P NMR}$  (202 MHz,  $\text{CDCl}_3$ )  $\delta$  32.96 (d,  $J = 4.4$  Hz). **HRMS** (ESI)  $m/z$ :  $[\text{M} + \text{H}]^+$  calcd for  $\text{C}_{19}\text{H}_{24}\text{O}_3\text{P}^+$  331.1458; found 331.1454.

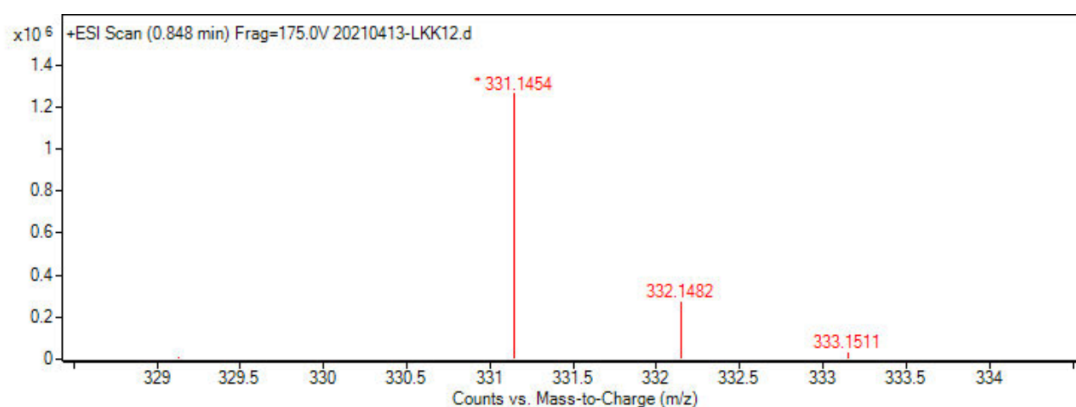

#### (4-fluorophenyl)(phenyl)(2-(tetrahydrofuran-2-yl)ethyl)phosphine oxide

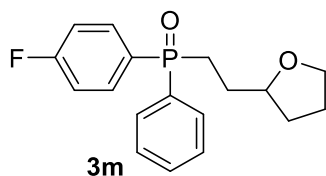

Colorless liquid, 40.4 mg, 42% yield.  $^1\text{H NMR}$  (500 MHz,  $\text{CDCl}_3$ )  $\delta$  7.80 – 7.69 (m, 4H), 7.56 – 7.50 (m, 1H), 7.50 – 7.45 (m, 2H), 7.16 (tdd,  $J = 8.5, 3.5, 1.9$  Hz, 2H), 3.91 – 3.75 (m, 2H), 3.70 (dd,  $J = 15.0, 7.1$  Hz, 1H), 2.61 – 2.43 (m, 1H), 2.32 – 2.21 (m, 1H), 1.97 (dt,  $J = 12.5, 6.6$  Hz, 1H), 1.92 – 1.79 (m, 3H), 1.76 – 1.62 (m, 1H), 1.45 (ddd,  $J = 15.5, 12.3, 7.6$  Hz, 1H).  $^{13}\text{C NMR}$  (126 MHz,  $\text{CDCl}_3$ )  $\delta$  164.90 (d,  $J = 253.0$  Hz), 133.25 (ddd,  $J = 15.2, 10.6, 8.7$  Hz), 132.42 (dd,  $J = 83.4, 49.3$  Hz), 131.83 (d,  $J = 2.6$  Hz), 130.70 (dd,  $J = 14.9, 9.3$  Hz), 128.93 (dd,  $J = 102.3, 50.1$  Hz), 128.72 (dd,  $J = 11.7, 1.9$  Hz), 115.99 (ddd,  $J = 21.4, 12.7, 2.4$  Hz), 79.08 (dd,  $J = 14.8, 3.0$  Hz), 67.72, 31.04 (d,  $J = 3.9$  Hz), 27.31 (dd,  $J = 3.3, 2.4$  Hz), 26.62 (dd,  $J = 73.4, 3.9$  Hz), 25.66.  $^{31}\text{P NMR}$  (202 MHz,  $\text{CDCl}_3$ )  $\delta$  32.30.  $^{19}\text{F NMR}$  (376 MHz,  $\text{CDCl}_3$ )  $\delta$  -107.08 (d,  $J = 5.5$  Hz). **HRMS** (ESI)  $m/z$ :  $[\text{M} + \text{H}]^+$  calcd for  $\text{C}_{18}\text{H}_{21}\text{FO}_2\text{P}^+$  319.1258; found 319.1257.

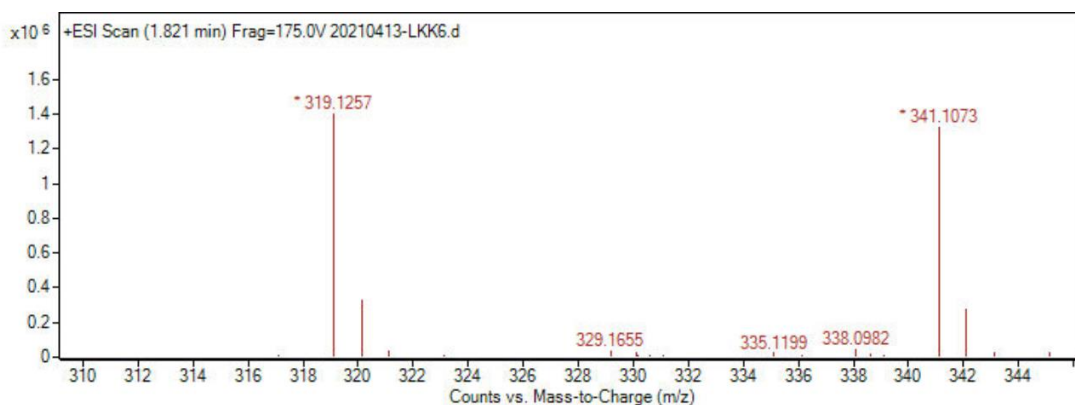

### (4-chlorophenyl)(phenyl)(2-(tetrahydrofuran-2-yl)ethyl)phosphine oxide

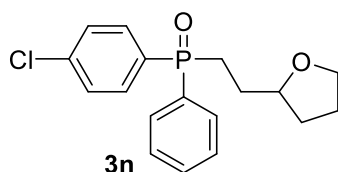

Colorless liquid, 49.2 mg, 49% yield.  $^1\text{H NMR}$  (500 MHz,  $\text{CDCl}_3$ )  $\delta$  7.79 – 7.62 (m, 4H), 7.57 – 7.41 (m, 5H), 3.92 – 3.75 (m, 2H), 3.74 – 3.66 (m, 1H), 2.58 – 2.44 (m, 1H), 2.26 (dddd,  $J = 23.0, 15.0, 12.1, 4.4$  Hz, 1H), 1.97 (dt,  $J = 12.3, 6.6$  Hz, 1H), 1.91 – 1.79 (m, 3H), 1.76 – 1.63 (m, 1H), 1.45 (ddd,  $J = 15.5, 12.1, 7.6$  Hz, 1H).  $^{13}\text{C NMR}$  (126 MHz,  $\text{CDCl}_3$ )  $\delta$  138.26 (d,  $J = 3.3$  Hz), 132.97 (d,  $J = 47.9$  Hz), 132.23 (dd,  $J = 15.3, 10.0$  Hz), 131.91 (d,  $J = 2.7$  Hz), 131.22 (d,  $J = 49.7$  Hz), 130.69 (dd,  $J = 14.6, 9.3$  Hz), 128.99 (dd,  $J = 12.1, 2.4$  Hz), 128.76 (dd,  $J = 11.7, 2.1$  Hz), 79.06 (dd,  $J = 14.8, 4.5$  Hz), 67.73, 31.05 (d,  $J = 4.2$  Hz), 27.29 (t,  $J = 3.8$  Hz), 26.47 (dd,  $J = 73.3, 5.5$  Hz), 25.66.  $^{31}\text{P NMR}$  (202 MHz,  $\text{CDCl}_3$ )  $\delta$  32.30. **HRMS** (ESI)  $m/z$ :  $[\text{M} + \text{H}]^+$  calcd for  $\text{C}_{18}\text{H}_{21}\text{ClO}_2\text{P}^+$  335.0962; found 335.0953.

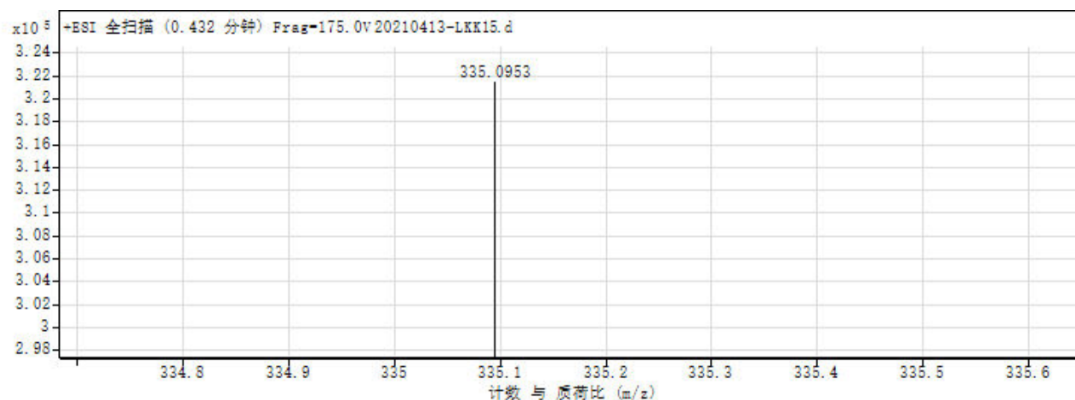

### [1,1'-biphenyl]-4-yl(phenyl)(2-(tetrahydrofuran-2-yl)ethyl)phosphine oxide

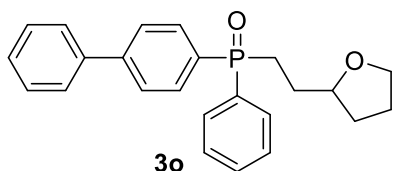

White solid, 51.3 mg, 45% yield, m.p. 131-134 °C.  $^1\text{H NMR}$  (500 MHz,  $\text{CDCl}_3$ )  $\delta$  7.87 – 7.75 (m, 4H), 7.68 (dd,  $J = 5.2, 2.9$  Hz, 2H), 7.62 – 7.56 (m, 2H), 7.53 – 7.42 (m, 5H), 7.37 (t,  $J = 7.3$  Hz, 1H), 3.84 (ddd,  $J = 21.7, 10.8, 5.6$  Hz, 2H), 3.70 (dd,  $J = 14.9, 7.3$  Hz, 1H), 2.63 – 2.49 (m, 1H), 2.36 – 2.24 (m, 1H), 2.01 – 1.80 (m, 4H), 1.74 (dtd,  $J = 16.5, 8.2, 4.1$  Hz, 1H), 1.47 (ddd,  $J = 15.4, 12.3, 7.6$  Hz, 1H).  $^{13}\text{C NMR}$  (126 MHz,

CDCl<sub>3</sub>) δ 144.49 (d, *J* = 2.5 Hz), 139.94, 133.10 (dd, *J* = 98.6, 47.2 Hz), 131.72 (d, *J* = 2.6 Hz), 131.58 (dd, *J* = 99.5, 48.7 Hz), 131.33 (dd, *J* = 14.6, 9.5 Hz), 130.81 (dd, *J* = 14.5, 9.3 Hz), 128.94, 128.69 (dd, *J* = 11.6, 1.7 Hz), 128.11, 127.33 (dd, *J* = 11.9, 1.8 Hz), 127.25, 79.22 (dd, *J* = 14.9, 2.5 Hz), 67.74, 31.07 (d, *J* = 0.9 Hz), 27.41 – 27.37 (m), 26.64 (dd, *J* = 73.1, 3.5 Hz), 25.69. <sup>31</sup>P NMR (202 MHz, CDCl<sub>3</sub>) δ 32.72. HRMS (ESI) *m/z*: [M + H]<sup>+</sup> calcd for C<sub>24</sub>H<sub>26</sub>O<sub>2</sub>P<sup>+</sup> 377.1665; found 377.1665.

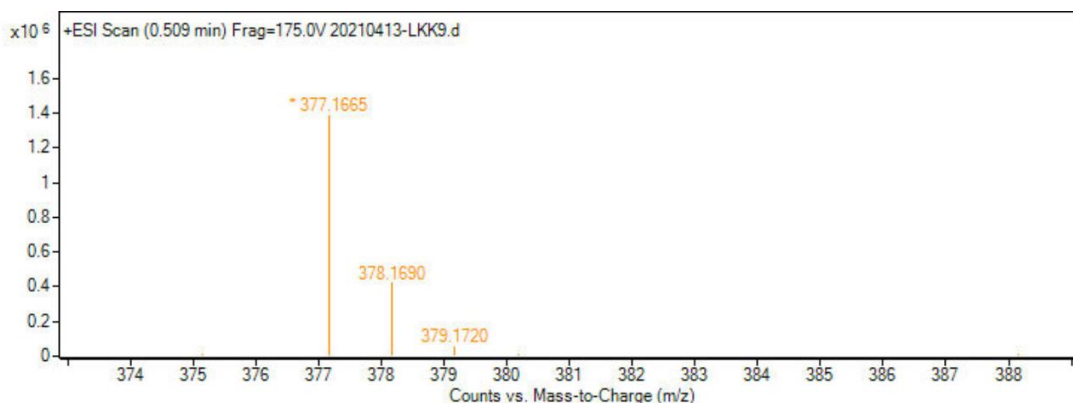

### naphthalen-2-yl(phenyl)(2-(tetrahydrofuran-2-yl)ethyl)phosphine oxide

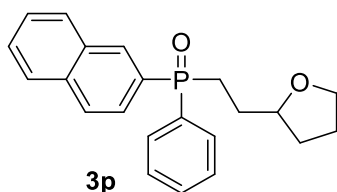

Colorless liquid, 52.1 mg, 50% yield. <sup>1</sup>H NMR (500 MHz, CDCl<sub>3</sub>) δ 8.41 (dd, *J* = 13.1, 6.3 Hz, 1H), 7.96 – 7.84 (m, 3H), 7.83 – 7.74 (m, 2H), 7.67 (t, *J* = 8.9 Hz, 1H), 7.61 – 7.42 (m, 5H), 3.88 (dq, *J* = 13.8, 6.9 Hz, 1H), 3.84 – 3.76 (m, 1H), 3.70 (dd, *J* = 14.8, 7.3 Hz, 1H), 2.70 – 2.55 (m, 1H), 2.45 – 2.30 (m, 1H), 2.01 – 1.66 (m, 5H), 1.50 – 1.40 (m, 1H). <sup>13</sup>C NMR (126 MHz, CDCl<sub>3</sub>) δ 134.61 (d, *J* = 2.2 Hz), 133.03 (dd, *J* = 98.8, 45.5 Hz), 132.80 (dd, *J* = 23.6, 8.4 Hz), 132.57 (dd, *J* = 12.7, 2.6 Hz), 131.77 (d, *J* = 2.5 Hz), 130.79 (dd, *J* = 14.1, 9.5 Hz), 129.80 (dd, *J* = 98.8, 50.0 Hz), 128.87, 128.70 (dd, *J* = 11.9, 1.4 Hz), 128.53 (dd, *J* = 11.5, 2.0 Hz), 128.12, 127.81, 126.96, 125.63 (dd, *J* = 10.3, 9.2 Hz), 79.19 (dd, *J* = 14.7, 4.5 Hz), 67.72 (d, *J* = 2.0 Hz), 31.06, 27.37 (t, *J* = 4.0 Hz), 26.41 (dd, *J* = 72.9, 4.3 Hz), 25.65. <sup>31</sup>P NMR (202 MHz, CDCl<sub>3</sub>) δ 33.29. HRMS (ESI) *m/z*: [M + H]<sup>+</sup> calcd for C<sub>22</sub>H<sub>24</sub>O<sub>2</sub>P<sup>+</sup> 351.1508; found 351.1503.

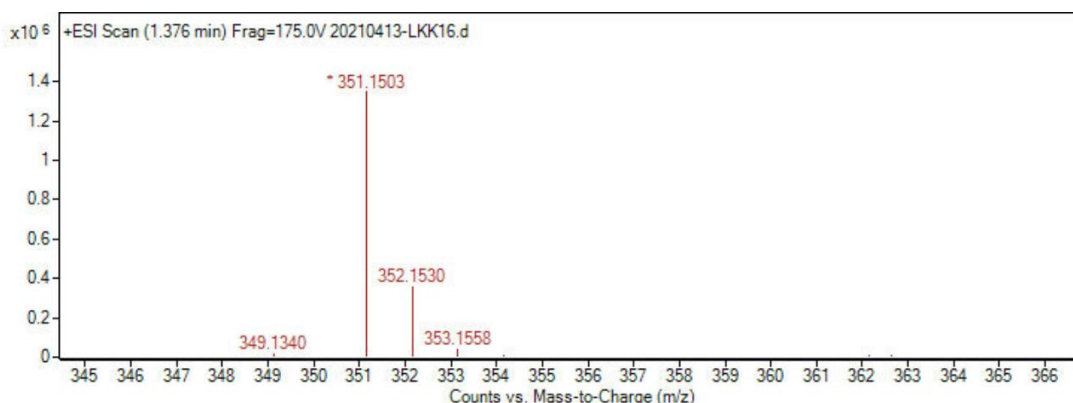

### (2-(2-methyltetrahydrofuran-2-yl)ethyl)diphenylphosphine oxide



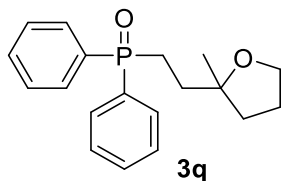

Colorless liquid, 45.0 mg (**3q/3q'** = 2.3:1), 48% yield.  $^1\text{H NMR}$  (500 MHz,  $\text{CDCl}_3$ )  $\delta$  7.81 – 7.67 (m, 4H), 7.56 – 7.42 (m, 6H), 4.01 (dd,  $J = 12.7, 6.1$  Hz, 1H), 3.97 – 3.85 (m, 1H), 3.82 (dd,  $J = 14.1, 7.5$  Hz, 1H), 3.70 (dd,  $J = 14.7, 7.3$  Hz, 1H), 2.46 – 2.22 (m, 2H), 2.00 – 1.58 (m, 6H), 1.19 (s, 3H).  $^{13}\text{C NMR}$  (126 MHz,  $\text{CDCl}_3$ )  $\delta$  131.89 (d,  $J = 98.9$  Hz), 130.71 (d,  $J = 2.3$  Hz), 129.78 (t,  $J = 9.5$  Hz), 127.65 (dd,  $J = 11.7, 2.5$  Hz), 80.85 (d,  $J = 14.0$  Hz), 66.32, 36.00, 31.77 (d,  $J = 224.3$  Hz), 30.82 (d,  $J = 3.3$  Hz), 24.96, 24.40.  $^{31}\text{P NMR}$  (202 MHz,  $\text{CDCl}_3$ )  $\delta$  34.12. **HRMS** (ESI)  $m/z$ :  $[\text{M} + \text{H}]^+$  calcd for  $\text{C}_{19}\text{H}_{24}\text{O}_2\text{P}^+$  351.1508; found 315.1514.

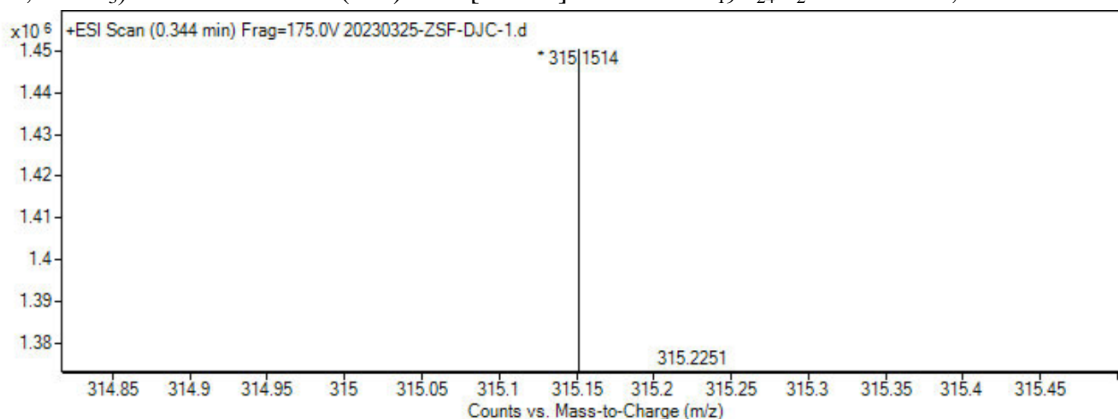

### (2-(1,3-dioxolan-2-yl)ethyl)diphenylphosphine oxide

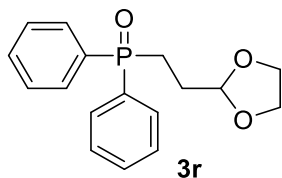

Colorless liquid, 30.5 mg (**3r/3r'** = 5.5:1), 34% yield.  $^1\text{H NMR}$  (500 MHz,  $\text{CDCl}_3$ )  $\delta$  7.75 (dd,  $J = 11.2, 7.3$  Hz, 4H), 7.56 – 7.42 (m, 6H), 4.96 (t,  $J = 4.1$  Hz, 1H), 3.99 – 3.78 (m, 4H), 2.47 – 2.31 (m, 2H), 1.97 (ddd,  $J = 16.5, 8.1, 4.2$  Hz, 2H).  $^{13}\text{C NMR}$  (126 MHz,  $\text{CDCl}_3$ )  $\delta$  132.62 (d,  $J = 99.2$  Hz), 31.82 (d,  $J = 2.5$  Hz), 130.84 (d,  $J = 9.3$  Hz), 128.71 (d,  $J = 11.5$  Hz), 103.51 (d,  $J = 16.3$  Hz), 65.08, 25.82 (d,  $J = 2.7$  Hz),  $\delta$  23.46 (d,  $J = 73.9$  Hz).  $^{31}\text{P NMR}$  (202 MHz,  $\text{CDCl}_3$ )  $\delta$  32.96. **HRMS** (ESI)  $m/z$ :  $[\text{M} + \text{H}]^+$  calcd for  $\text{C}_{17}\text{H}_{20}\text{O}_3\text{P}^+$  303.1145; found 303.1138.

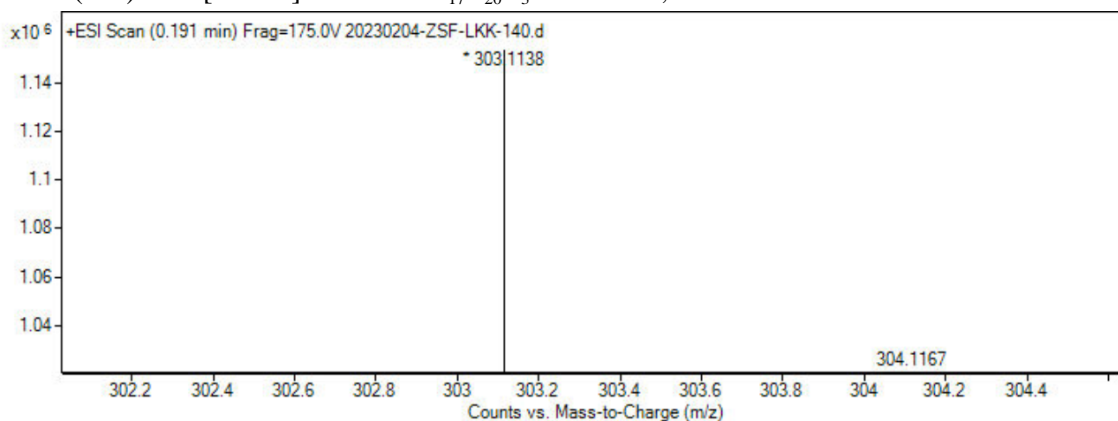

### (2-(1,4-dioxan-2-yl)ethyl)diphenylphosphine oxide



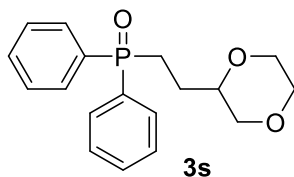

Colorless liquid, 36.1 mg, 38% yield.  $^1\text{H NMR}$  (500 MHz,  $\text{CDCl}_3$ )  $\delta$  7.88 – 7.63 (m, 4H), 7.50 (dd,  $J = 19.8, 6.7$  Hz, 6H), 3.76 – 3.49 (m, 6H), 3.22 (t,  $J = 10.6$  Hz, 1H), 2.62 – 2.49 (m, 1H), 2.37 – 2.19 (m, 1H), 1.75 (s, 1H), 1.67 – 1.54 (m, 1H).  $^{13}\text{C NMR}$  (126 MHz,  $\text{CDCl}_3$ )  $\delta$  132.50 (dd,  $J = 98.9, 67.5$  Hz), 131.90 (d,  $J = 2.4$  Hz), 130.77 (dd,  $J = 15.3, 9.4$  Hz), 128.76 (dd,  $J = 11.8, 5.5$  Hz), 75.11 (d,  $J = 13.5$  Hz), 70.87, 66.73, 66.40, 25.28 (d,  $J = 72.9$  Hz), 23.41 (d,  $J = 3.4$  Hz).  $^{31}\text{P NMR}$  (202 MHz,  $\text{CDCl}_3$ )  $\delta$  35.46. **HRMS** (ESI)  $m/z$ :  $[\text{M} + \text{H}]^+$  calcd for  $\text{C}_{18}\text{H}_{22}\text{O}_3\text{P}^+$  317.1301; found 317.1306.

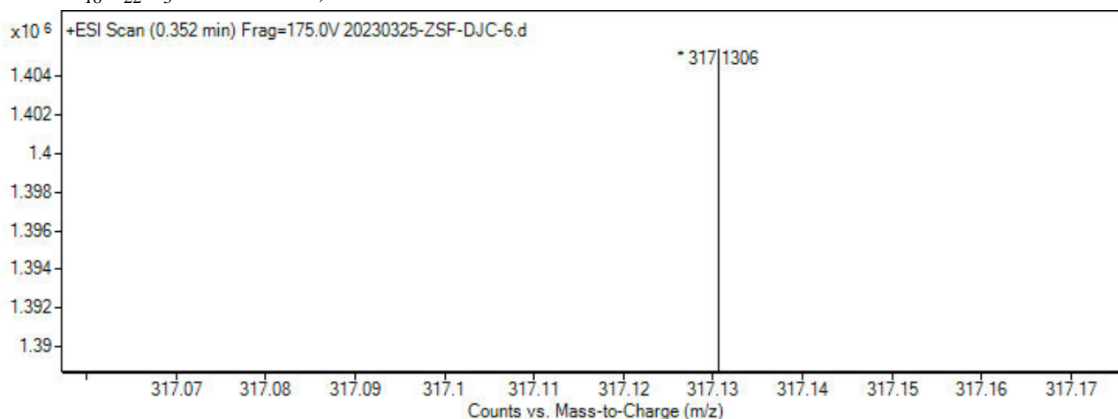

#### di-*o*-tolyl(vinyl)phosphine oxide

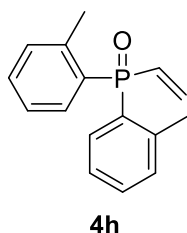

Colorless liquid, 15.8 mg, 21% yield.  $^1\text{H NMR}$  (500 MHz,  $\text{CDCl}_3$ )  $\delta$  7.58 (dd,  $J = 13.8, 7.7$  Hz, 2H), 7.42 (t,  $J = 7.5$  Hz, 2H), 7.29 – 7.18 (m, 4H), 6.75 (ddd,  $J = 24.7, 18.5, 12.6$  Hz, 1H), 6.40 – 6.24 (m, 2H), 2.39 (s, 6H).  $^{13}\text{C NMR}$  (126 MHz,  $\text{CDCl}_3$ )  $\delta$  142.06 (d,  $J = 8.5$  Hz), 134.61, 132.38 (d,  $J = 11.9$  Hz), 131.94 (d,  $J = 2.2$  Hz), 131.76 (d,  $J = 10.8$  Hz), 131.17 (d,  $J = 97.4$  Hz), 130.91 (d,  $J = 102.5$  Hz), 125.70 (d,  $J = 12.5$  Hz), 21.40 (d,  $J = 4.2$  Hz).  $^{31}\text{P NMR}$  (202 MHz,  $\text{CDCl}_3$ )  $\delta$  26.52. **HRMS** (ESI)  $m/z$ :  $[\text{M} + \text{H}]^+$  calcd for  $\text{C}_{16}\text{H}_{18}\text{OP}^+$  257.1090; found 257.1084.

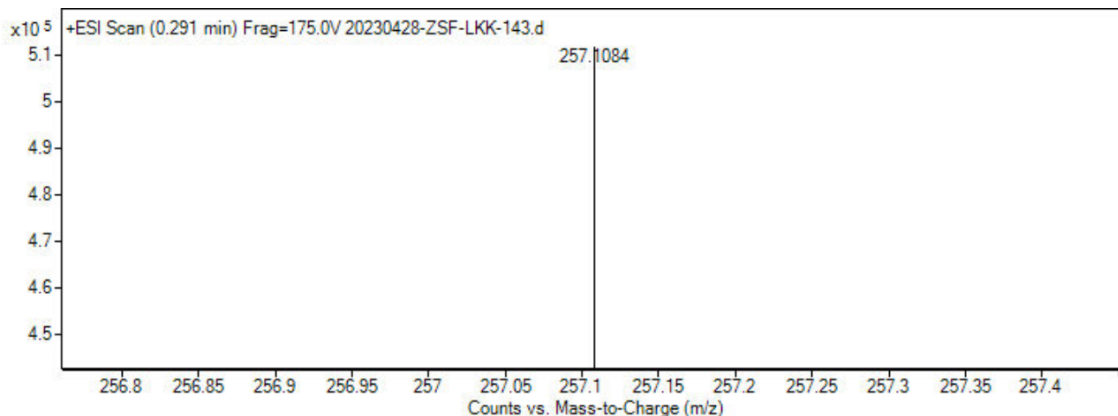

### 1,2-bis(diphenylphosphanyl)ethane (DPPE)<sup>4</sup>

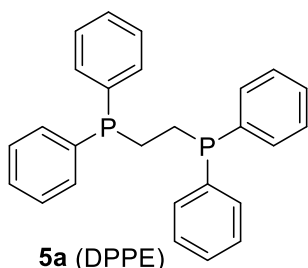

White solid, 101.7 mg, 85% yield. <sup>1</sup>H NMR (500 MHz, CDCl<sub>3</sub>) δ 7.39 – 7.18 (m, 20H), 2.15 – 2.03 (m, 4H). <sup>13</sup>C NMR (126 MHz, CDCl<sub>3</sub>) δ 138.19 (dd, *J* = 7.4, 5.9 Hz), 132.82 (t, *J* = 9.4 Hz), 128.75, 128.54 (t, *J* = 3.1 Hz), 23.95 (d, *J* = 2.3 Hz). <sup>31</sup>P NMR (202 MHz, CDCl<sub>3</sub>) δ -12.62.

### 1,2-bis(di-*p*-tolylphosphanyl)ethane<sup>5</sup>

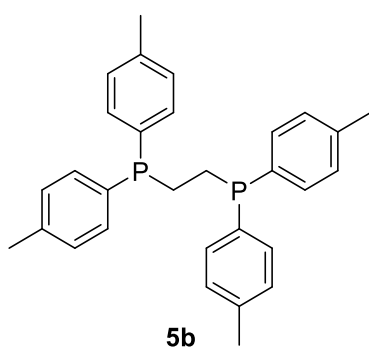

White solid, 27.1 mg, 60% yield. <sup>1</sup>H NMR (500 MHz, CDCl<sub>3</sub>) δ 7.21 (d, *J* = 7.1 Hz, 8H), 7.10 (d, *J* = 7.7 Hz, 8H), 2.32 (s, 12H), 2.04 (s, 4H). <sup>13</sup>C NMR (126 MHz, CDCl<sub>3</sub>) δ 138.49, 134.89 (t, *J* = 6.0 Hz), 132.70 (t, *J* = 9.6 Hz), 129.21 (t, *J* = 3.2 Hz), 24.04 (d, *J* = 2.8 Hz), 21.27. <sup>31</sup>P NMR (202 MHz, CDCl<sub>3</sub>) δ -14.32.

### diphenyl(2-(tetrahydrofuran-2-yl)ethyl)phosphane

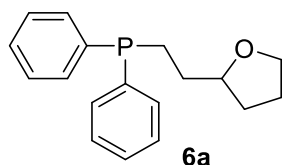

Colorless liquid, 23.5 mg, 83% yield. <sup>1</sup>H NMR (500 MHz, CDCl<sub>3</sub>) δ 7.42 (t, *J* = 6.7 Hz, 4H), 7.30 (t, *J* = 8.4 Hz, 6H), 3.86 (dq, *J* = 14.3, 6.8 Hz, 2H), 3.71 (dd, *J* = 14.7, 7.4 Hz, 1H), 2.20 (td, *J* = 12.6, 4.8 Hz, 1H), 2.09 – 1.92 (m, 2H), 1.90 – 1.79 (m, 2H), 1.72 – 1.62 (m, 1H), 1.56 (ddd, *J* = 18.7, 12.9, 5.3 Hz, 1H), 1.47 – 1.38 (m, 1H). <sup>13</sup>C NMR (126 MHz, CDCl<sub>3</sub>) δ 138.70 (dd, *J* = 12.8, 6.8 Hz), 132.74 (dd, *J* = 18.5, 6.1 Hz), 128.52 (d, *J* = 4.0 Hz), 128.39 (d, *J* = 6.8 Hz), 79.83 (d, *J* = 13.9 Hz), 67.69, 31.89 (d, *J* = 16.1 Hz), 31.15, 25.70, 24.53 (d, *J* = 11.3 Hz). <sup>31</sup>P NMR (202 MHz, CDCl<sub>3</sub>) δ -15.54. HRMS (ESI) *m/z*: [M + H]<sup>+</sup> calcd for C<sub>18</sub>H<sub>22</sub>OP<sup>+</sup> 285.1403; found 351.1503.

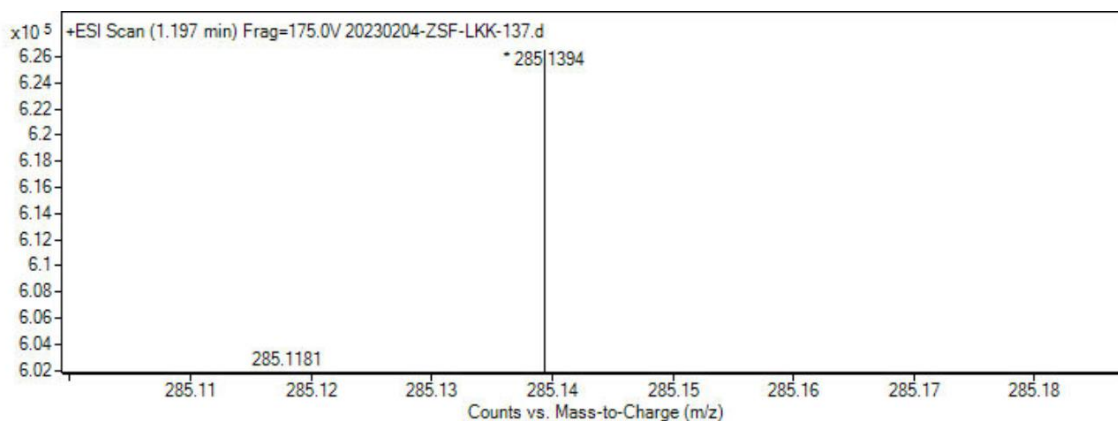

### bis(4-chlorophenyl)(2-(tetrahydrofuran-2-yl)ethyl)phosphane

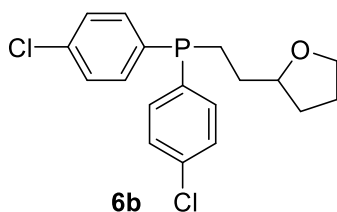

Colorless liquid, 28.7 mg, 81% yield.  $^1\text{H NMR}$  (500 MHz,  $\text{CDCl}_3$ )  $\delta$  7.38 – 7.27 (m, 8H), 3.92 – 3.77 (m, 2H), 3.71 (dd,  $J = 14.8, 7.4$  Hz, 1H), 2.23 – 2.11 (m, 1H), 1.98 (ddd,  $J = 24.5, 11.6, 5.7$  Hz, 2H), 1.90 – 1.81 (m, 2H), 1.65 – 1.60 (m, 1H), 1.57 – 1.48 (m, 1H), 1.45 – 1.39 (m, 1H).  $^{13}\text{C NMR}$  (126 MHz,  $\text{CDCl}_3$ )  $\delta$  136.84 (dd,  $J = 14.2, 12.4$  Hz), 135.02 (d,  $J = 2.2$  Hz), 133.96 (dd,  $J = 19.2, 3.0$  Hz), 128.76 (d,  $J = 6.7$  Hz), 79.62 (d,  $J = 13.9$  Hz), 67.73, 31.71 (d,  $J = 15.7$  Hz), 31.19, 25.70, 24.60 (d,  $J = 11.6$  Hz).  $^{31}\text{P NMR}$  (202 MHz,  $\text{CDCl}_3$ )  $\delta$  -17.20. **HRMS** (ESI)  $m/z$ :  $[\text{M} + \text{H}]^+$  calcd for  $\text{C}_{18}\text{H}_{19}\text{Cl}_2\text{NaOP}^+$  375.0443; found 375.0436.

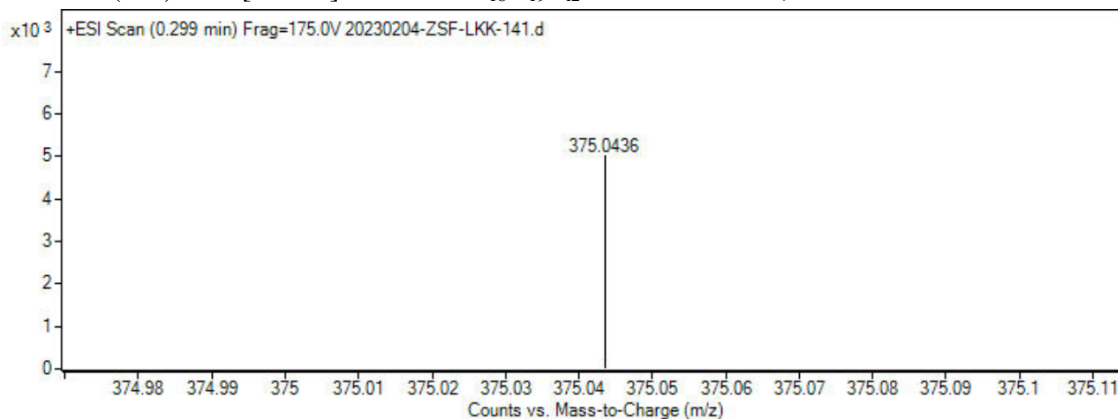

## 7. NMR spectra

LKK-I-28A

7.71  
7.50  
7.45

-2.53

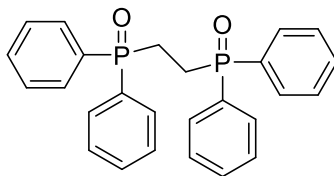

2a

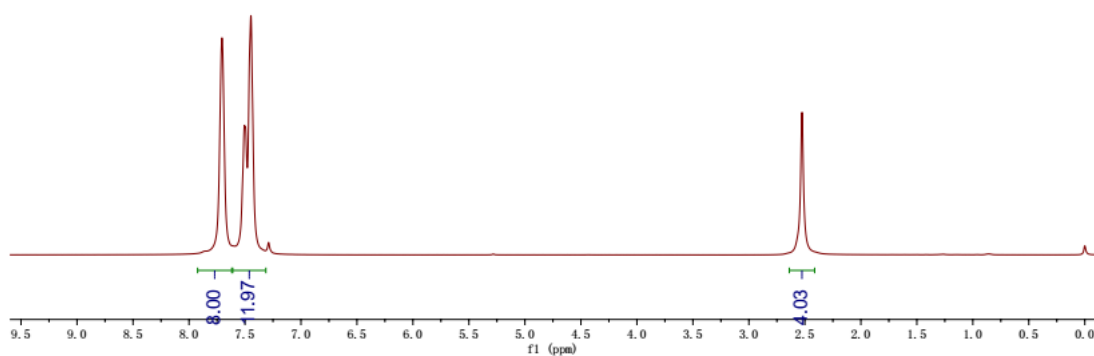

LKK-I-28A

132.28  
132.05  
131.49  
130.78  
130.74  
130.71  
128.87  
128.82  
128.78

77.42  
77.17  
76.91

21.93  
21.67  
21.41

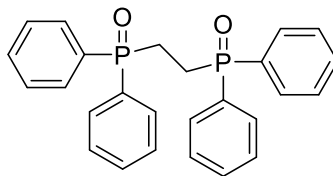

2a

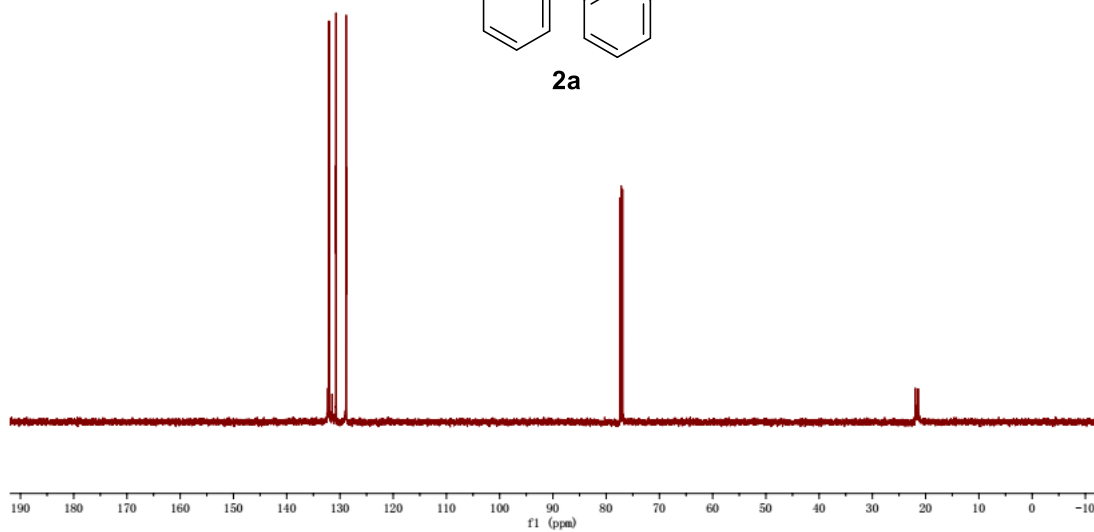

LKK-I-28A

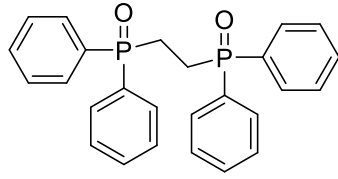

2a

-32.60

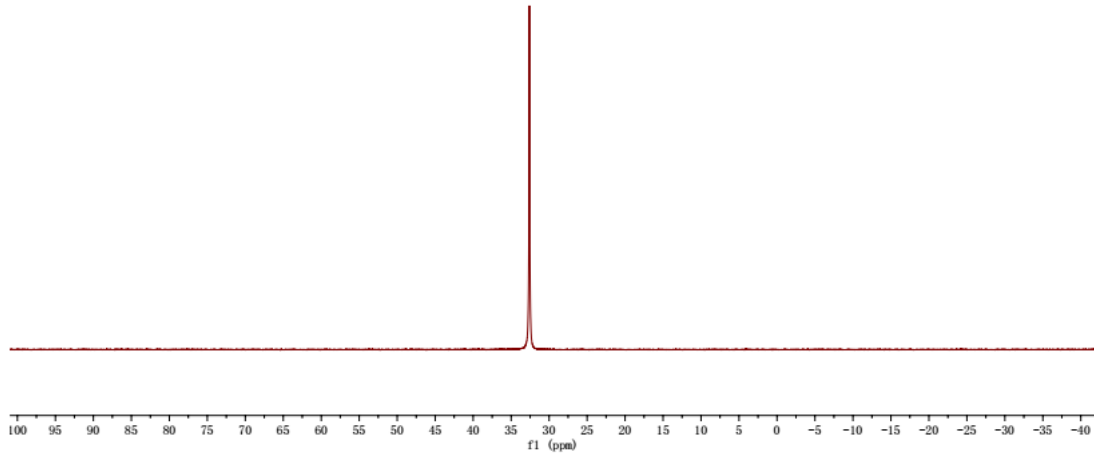

LKK-I-34A

7.59  
7.57  
7.55  
7.24  
7.23

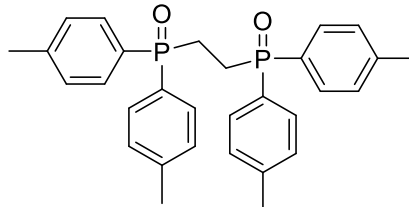

2b

2.46  
2.36

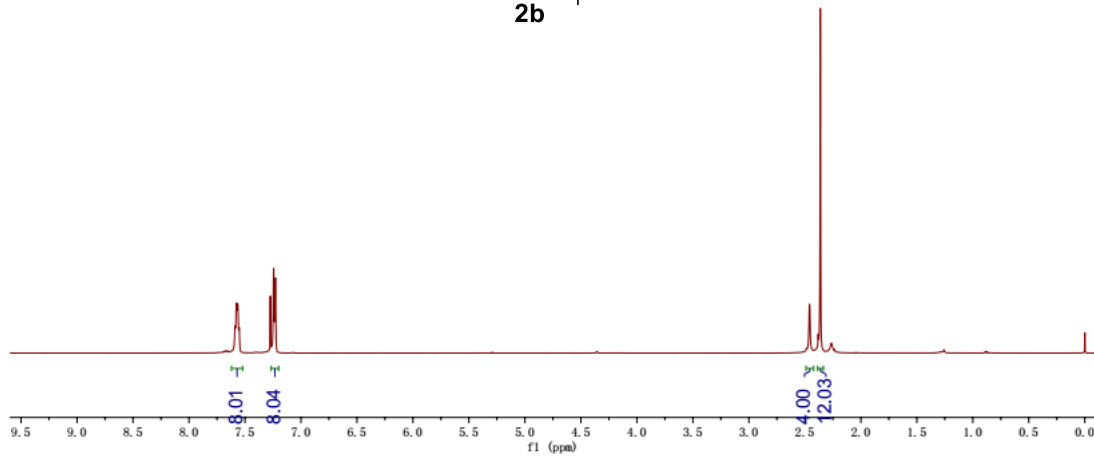

LKK-I-34A

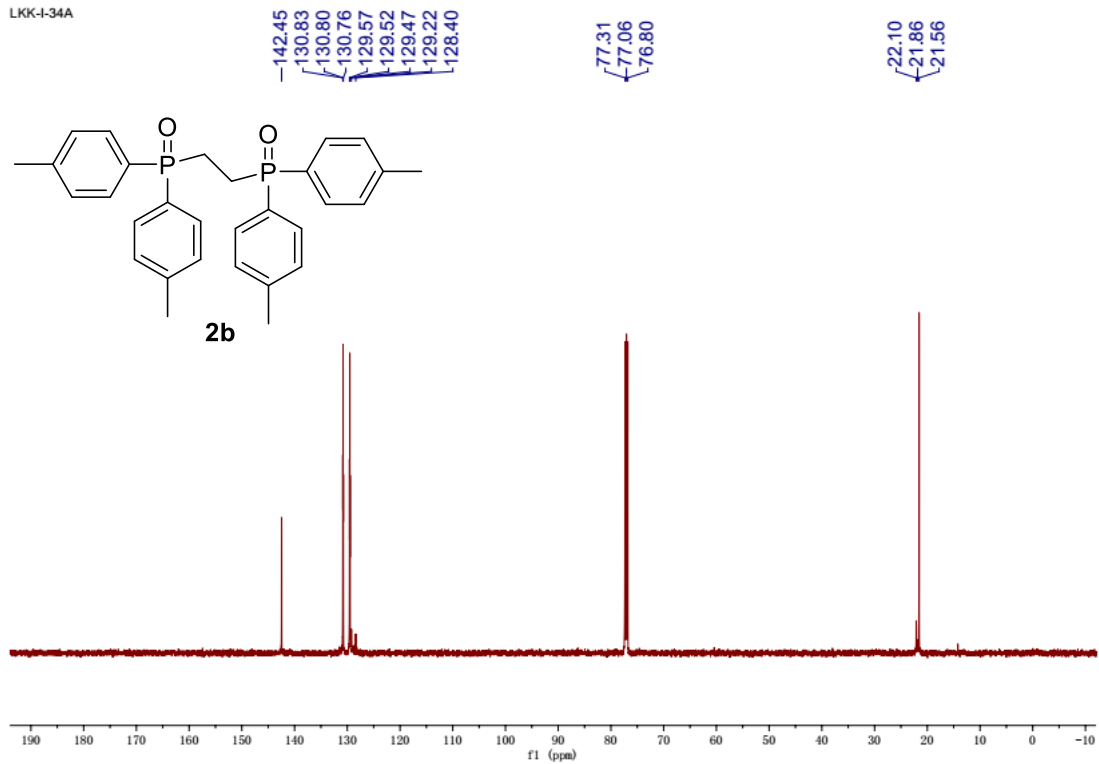

LKK-I-34A

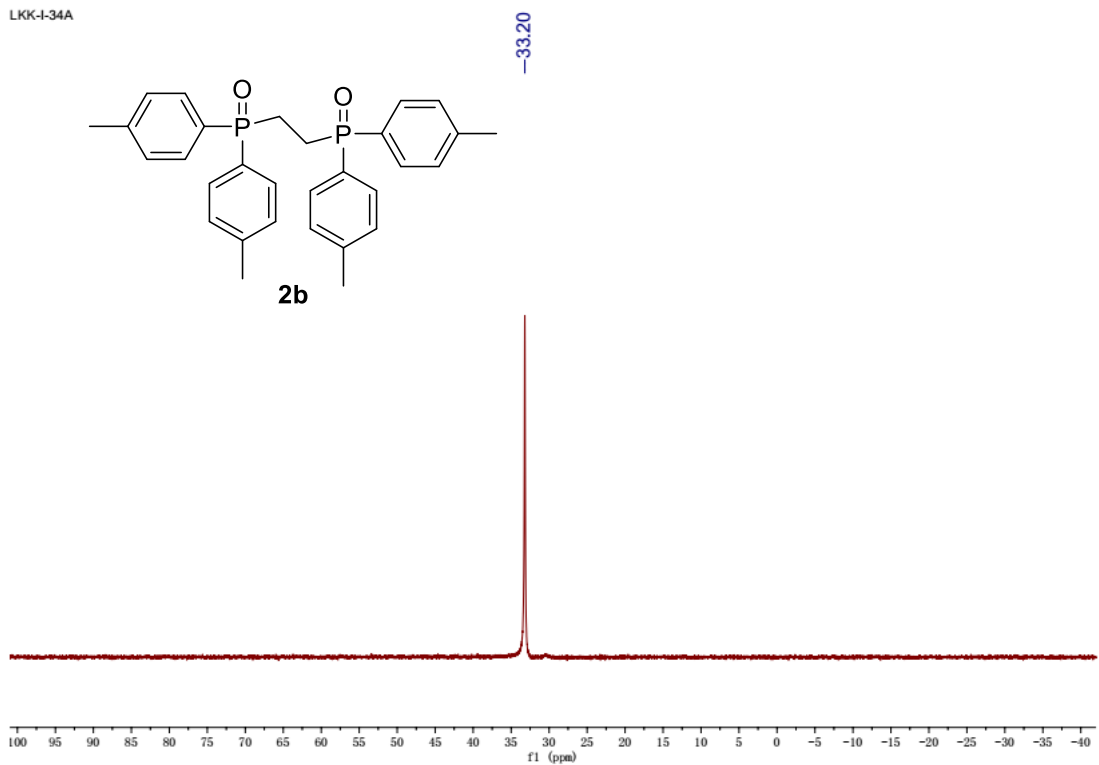

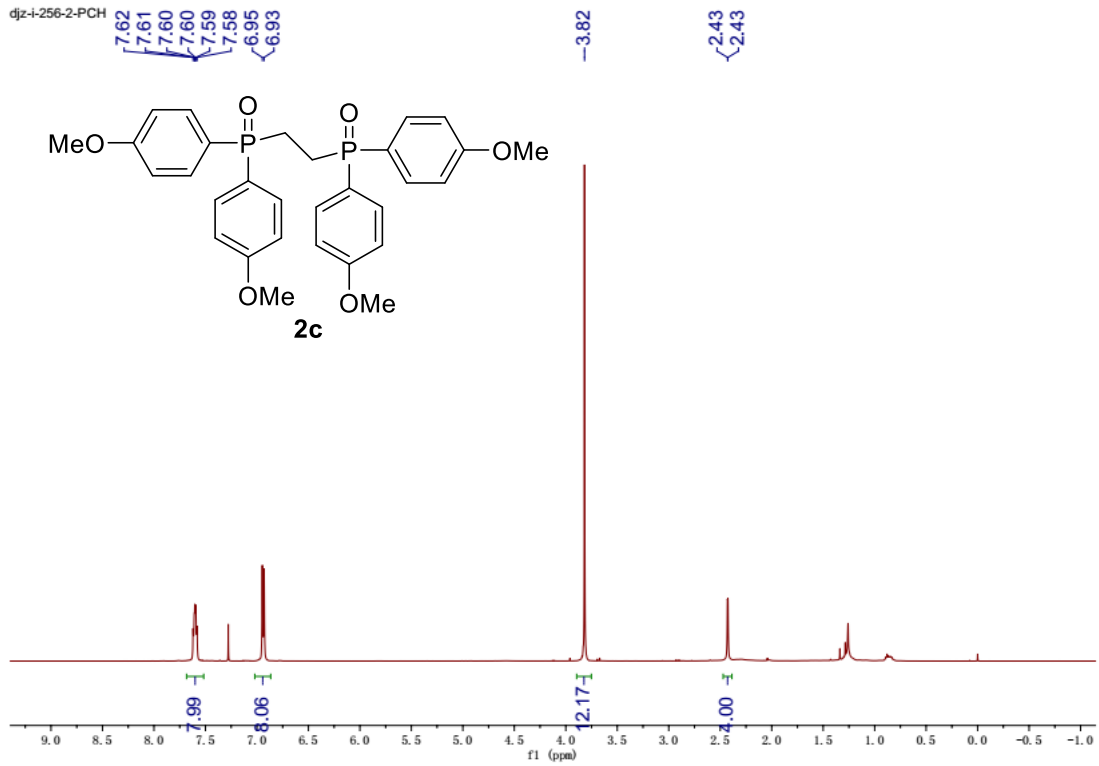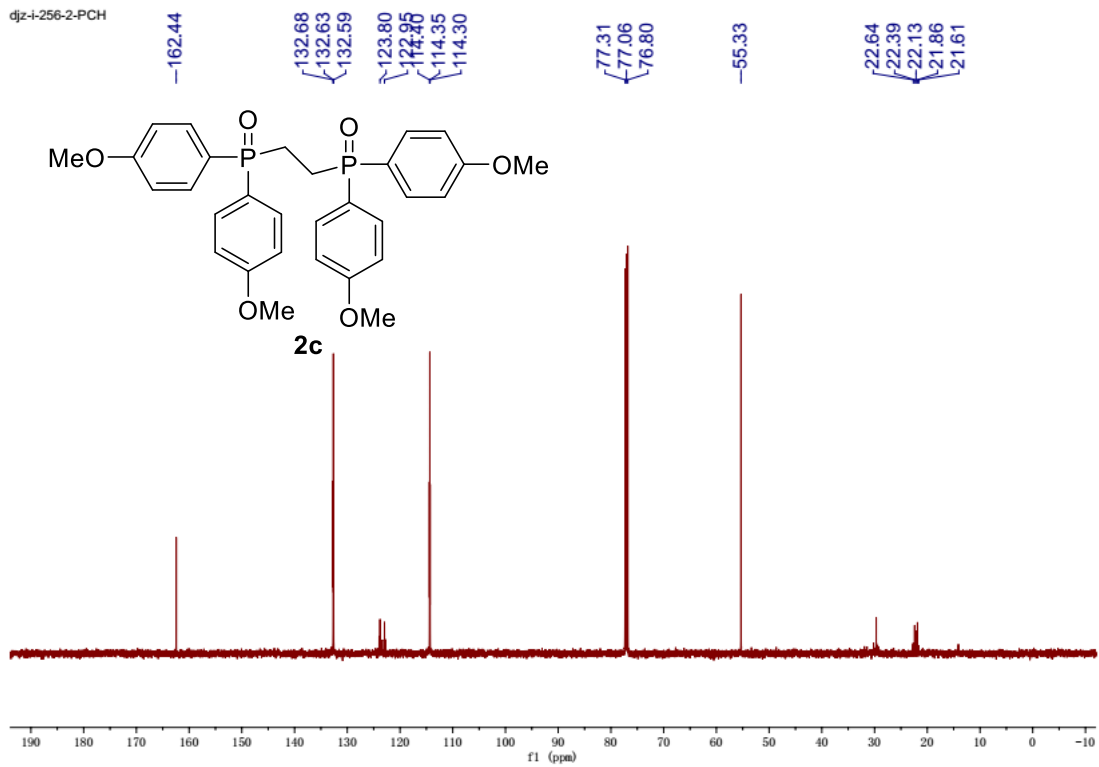

djz-4-256-2-PCH

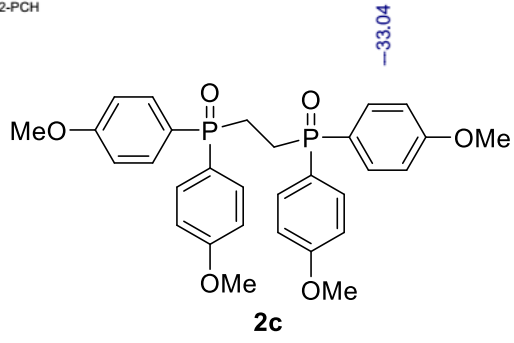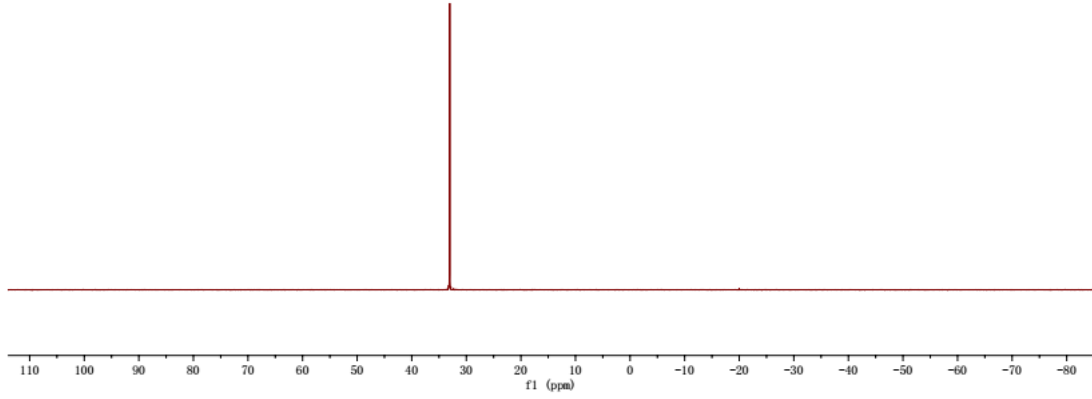

LKK-I-36A

7.70  
7.69  
7.19  
7.17  
7.15

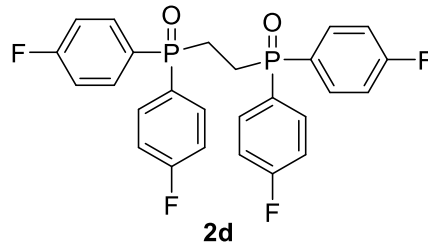

-2.47

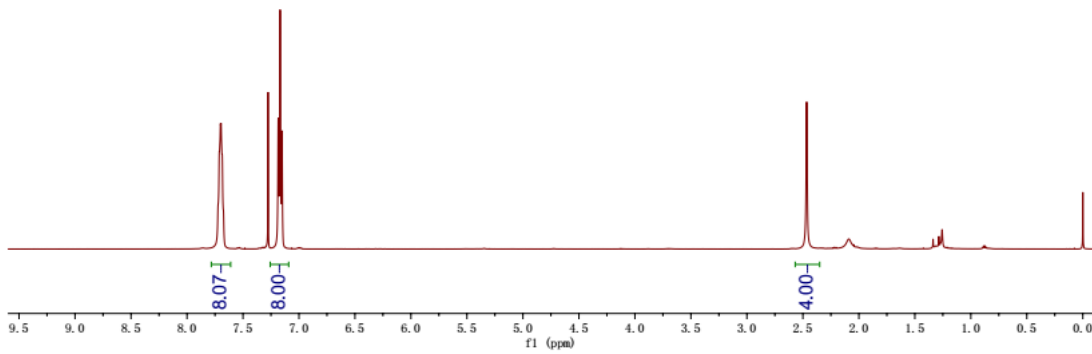



LKK-I-36A

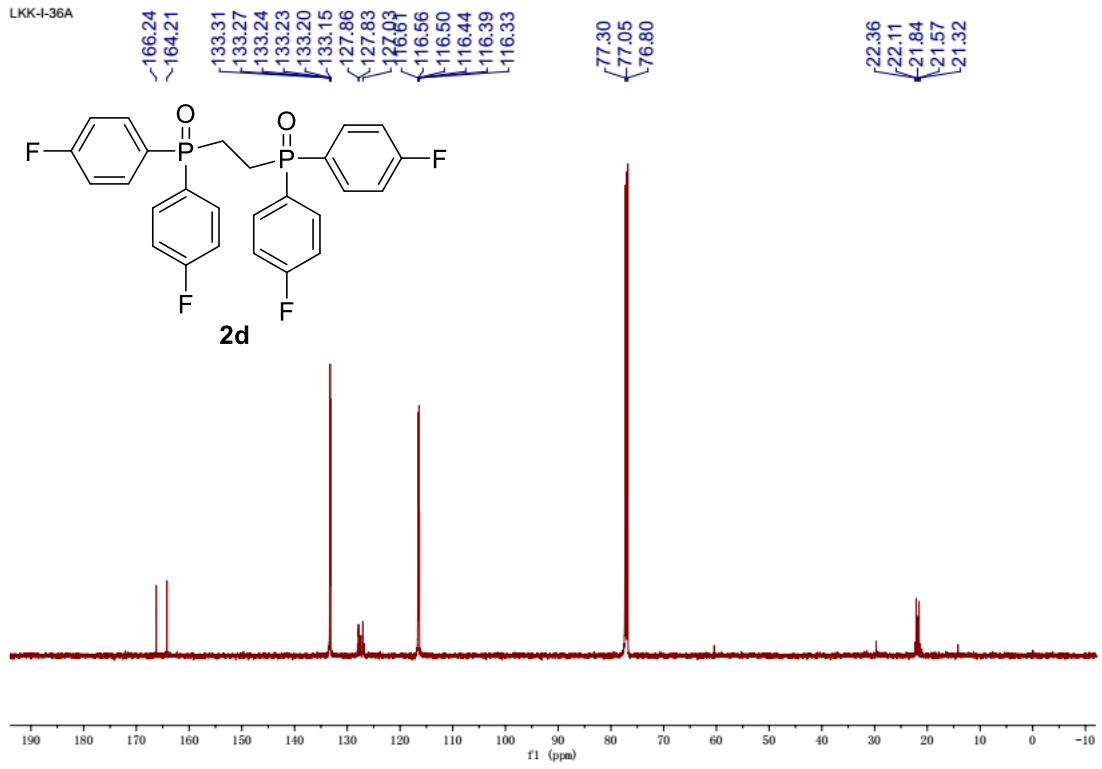

LKK-I-36A

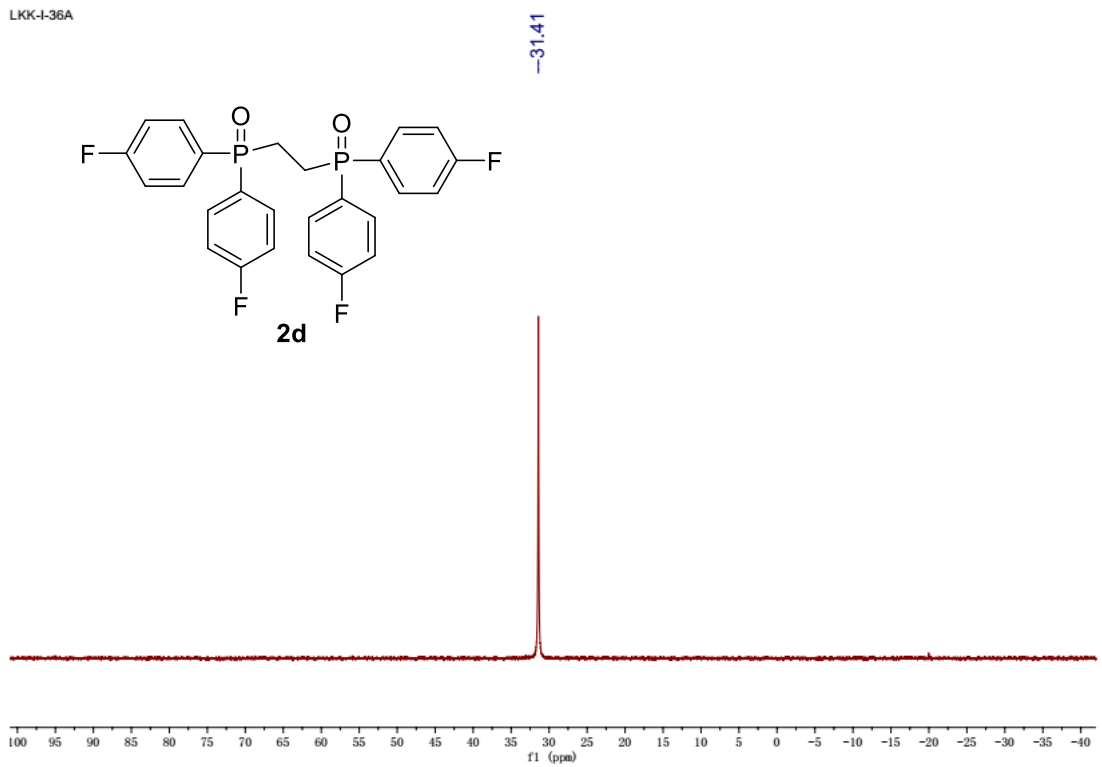

LKK-I-42A

--105.64

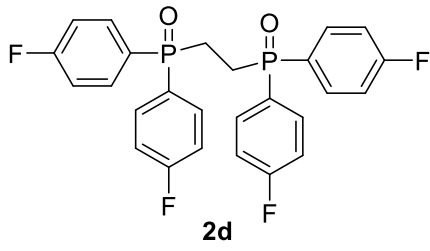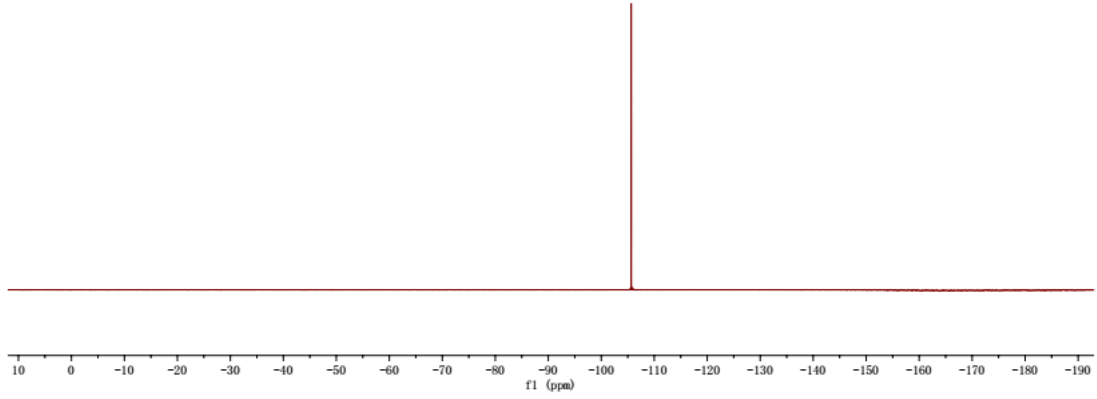

LKK-I-36B

7.64  
7.63  
7.63  
7.62  
7.60  
7.46  
7.45

--2.46

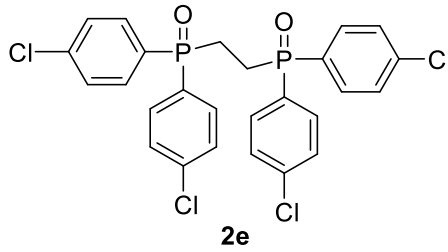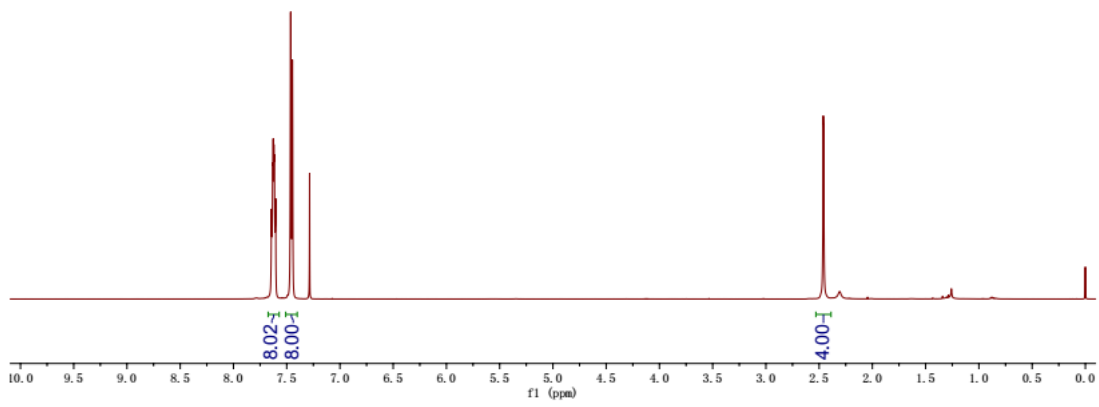

LKK-I-36B

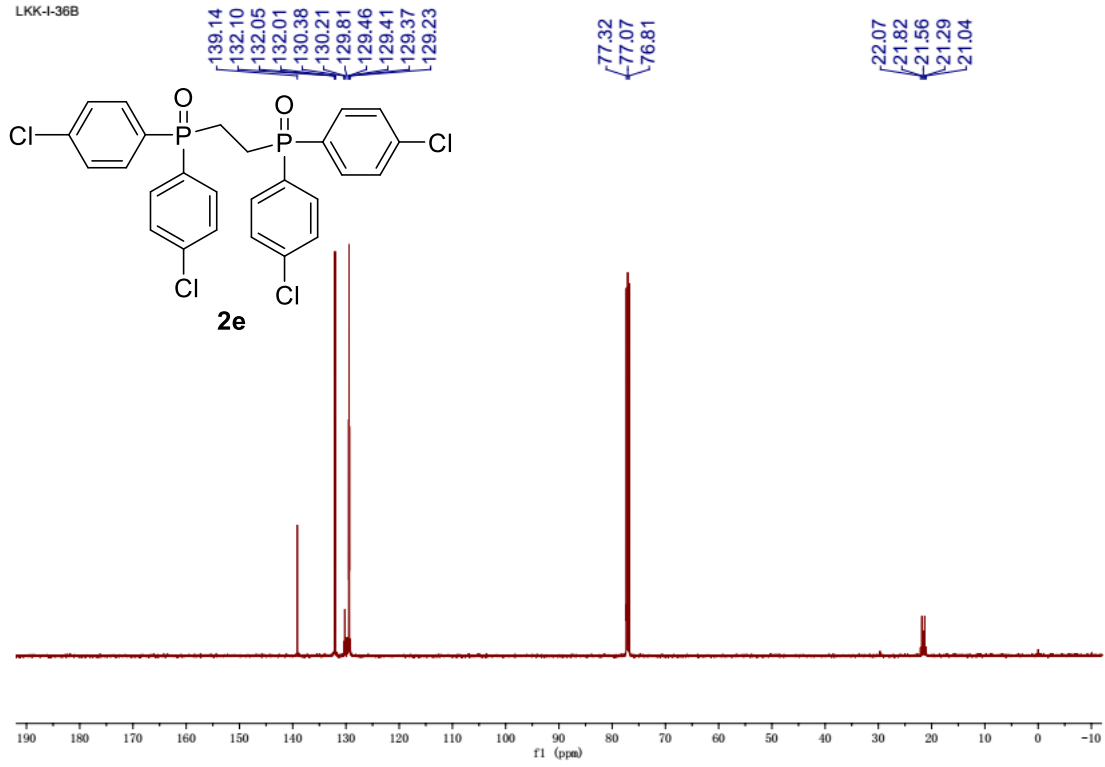

LKK-I-36B

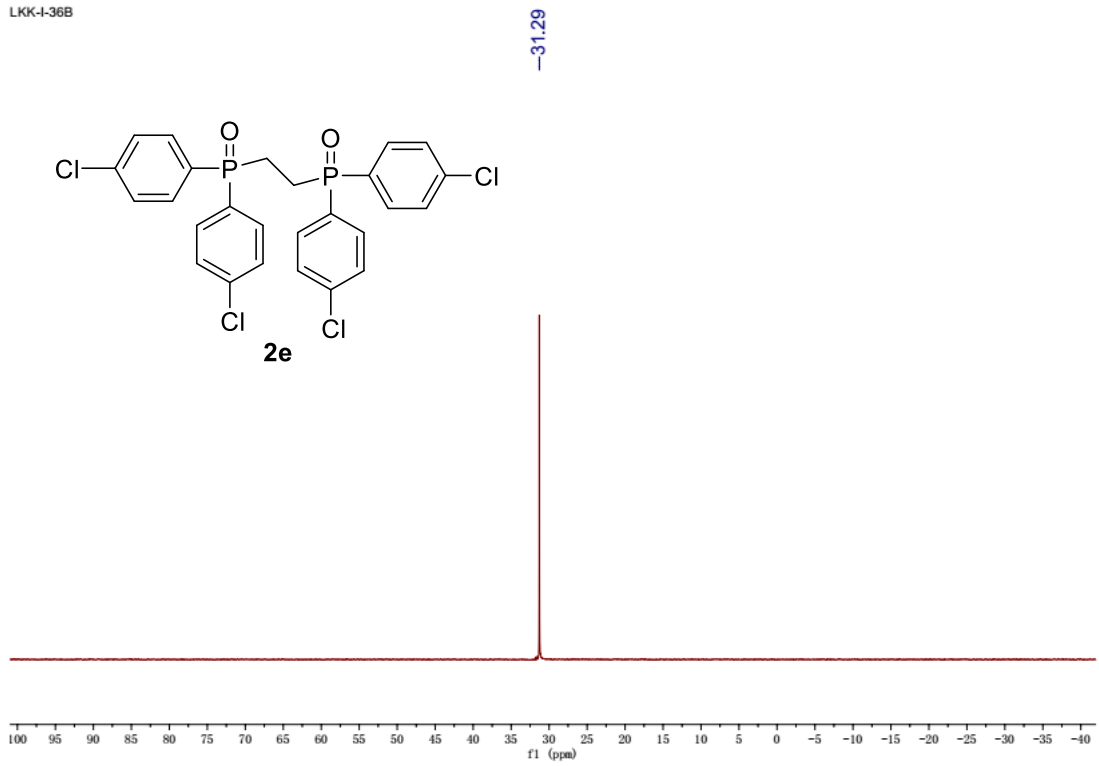

LKK-I-44B

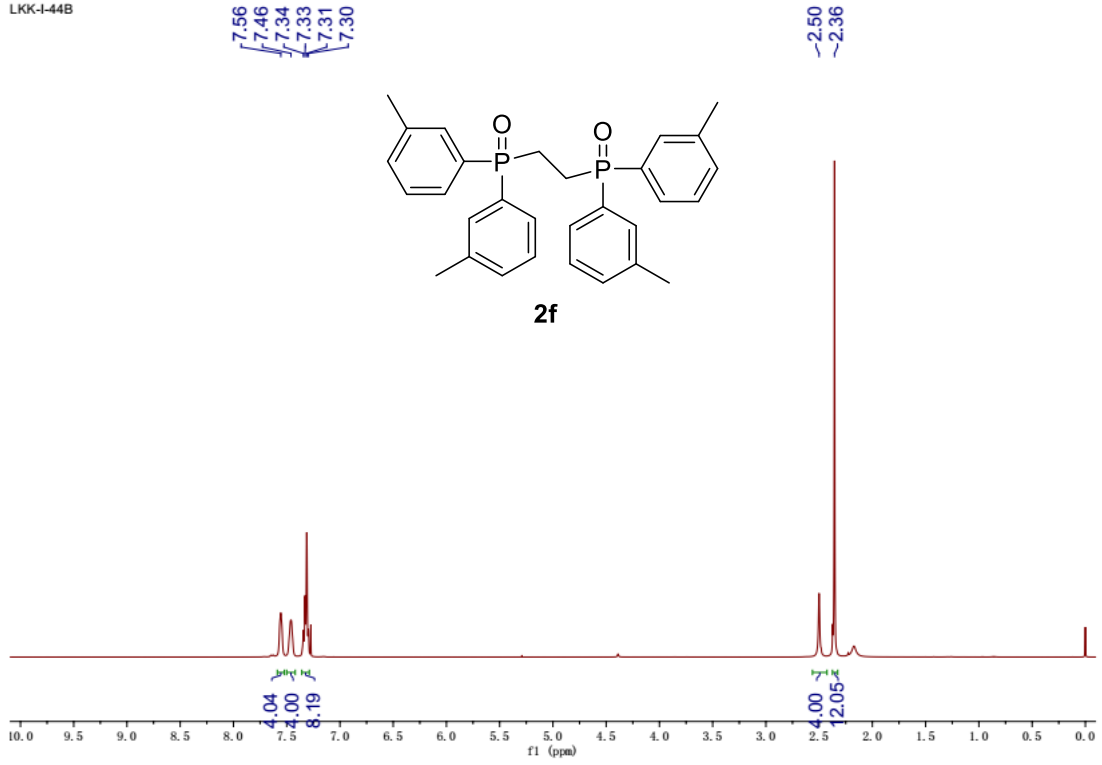

LKK-I-44B

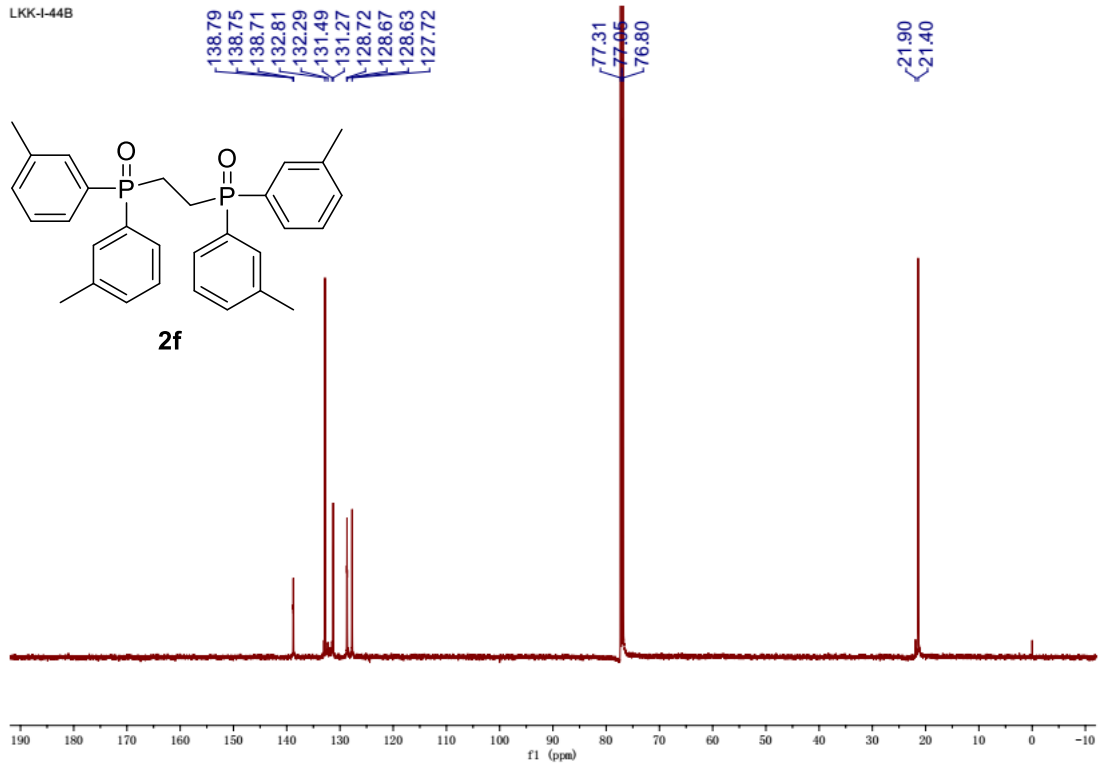

LKK-I-44B

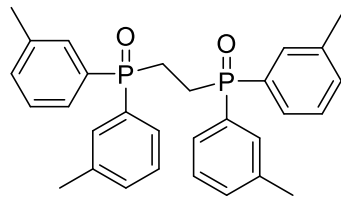

2f

-33.06

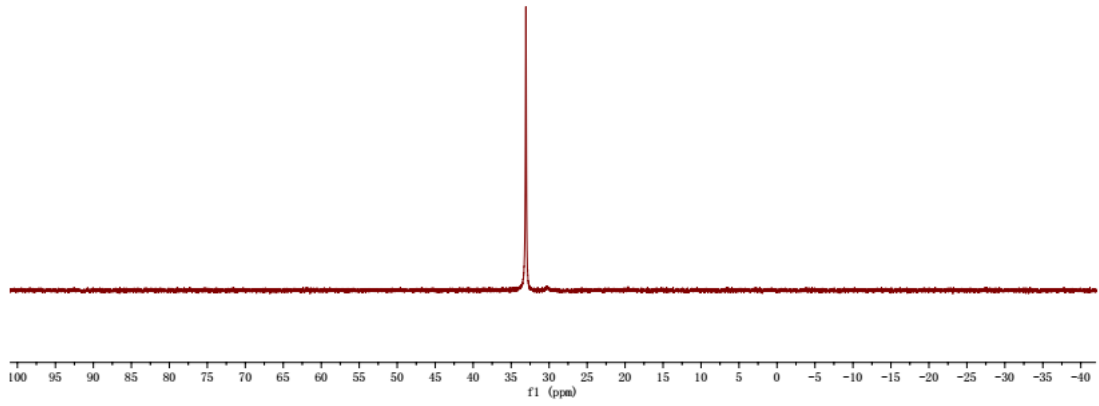

djz-i-187-1-PCH

7.48  
7.43  
7.43  
7.42  
7.26  
7.24

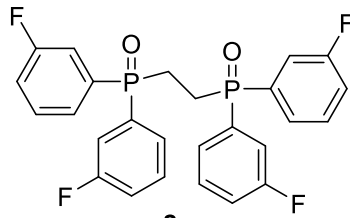

2g

-2.51

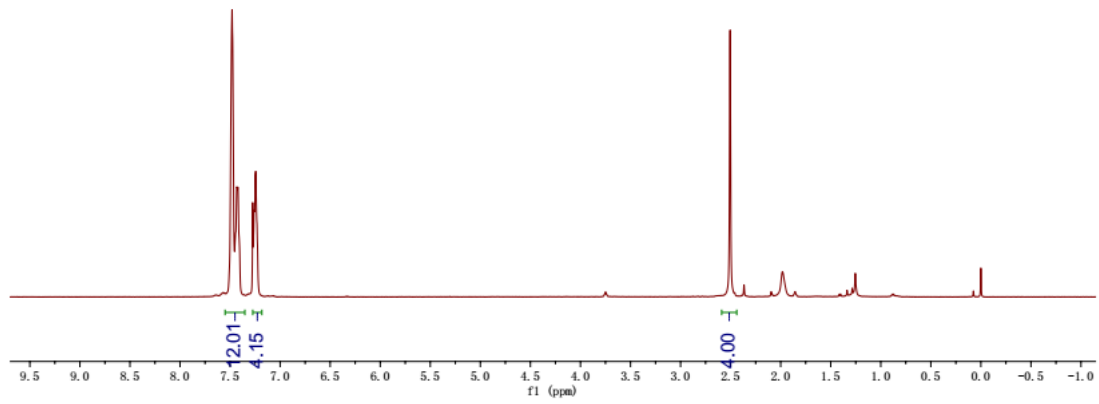

djz-i-187-1-PCH

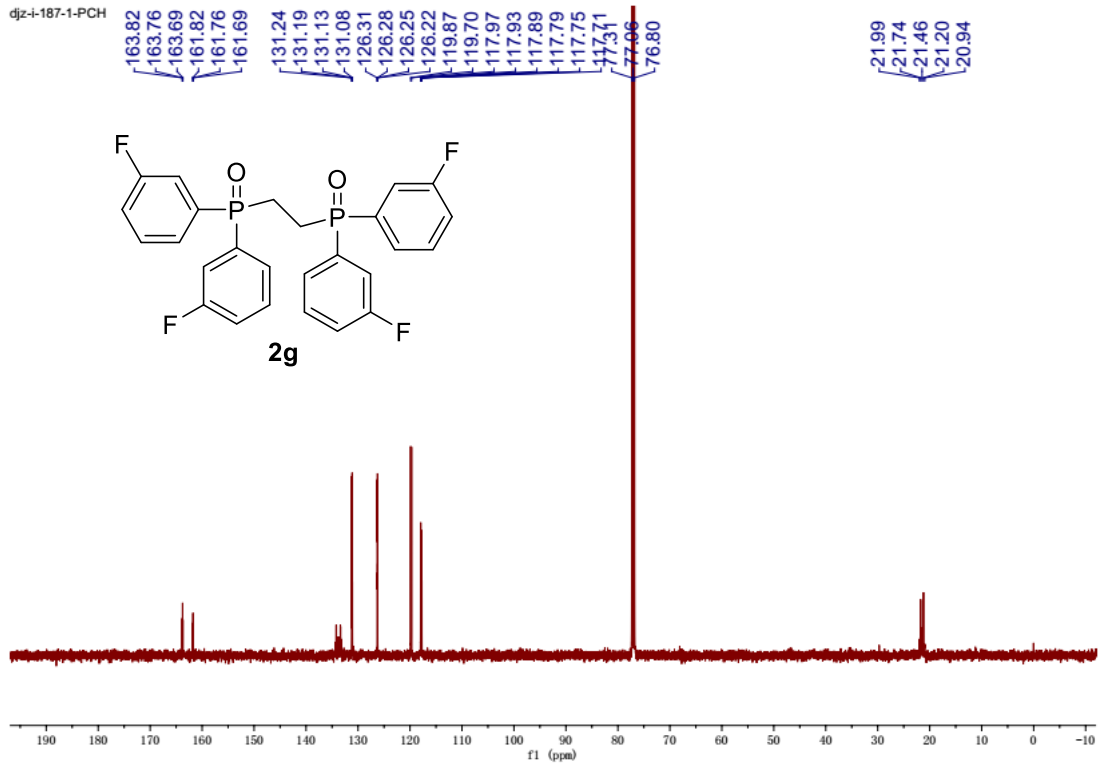

djz-i-187-1-PCH

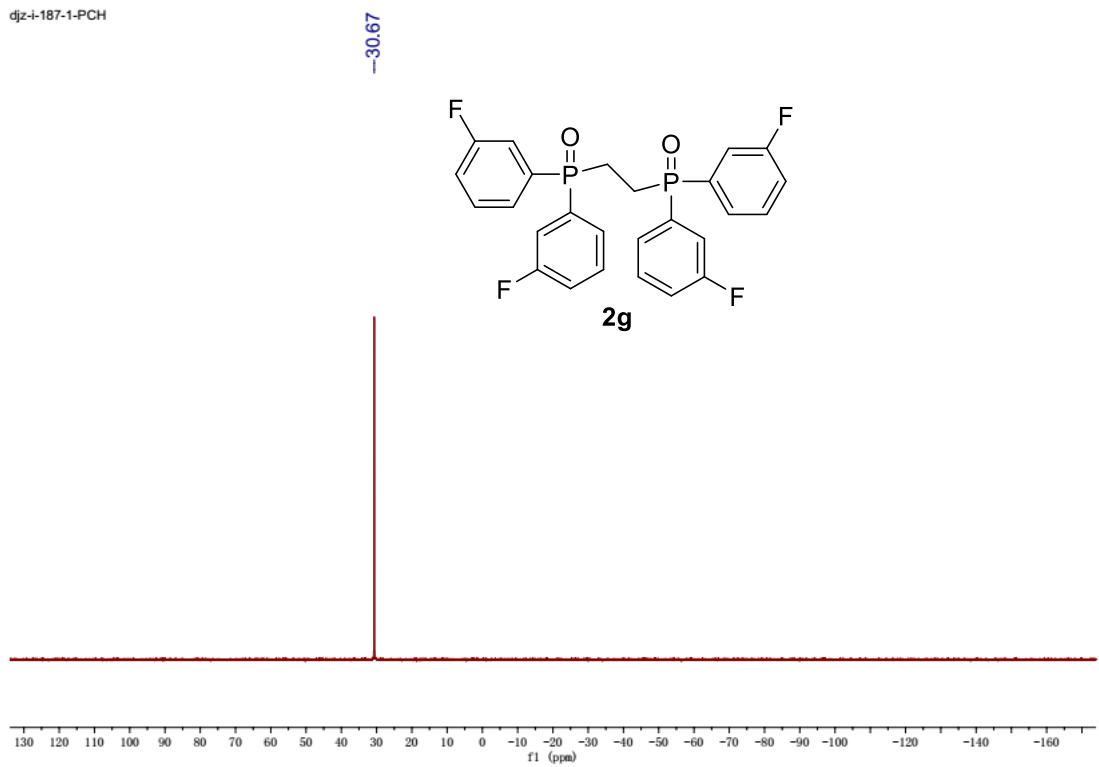

djz-187-1-PCH

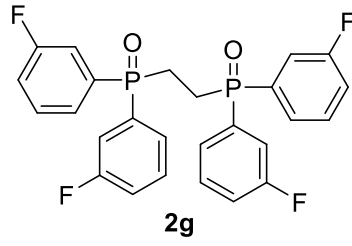

-109.79

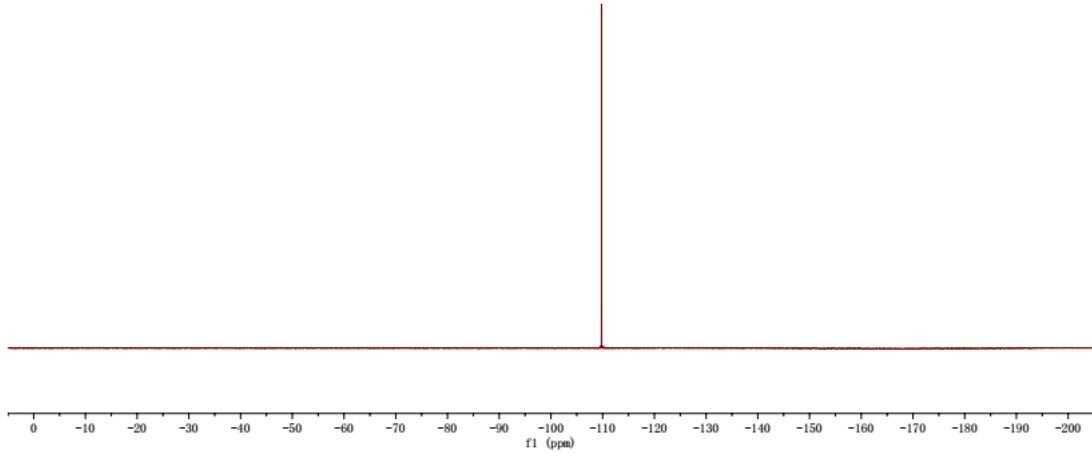

LKK-I-44C

8.41  
8.40  
8.38  
7.86  
7.85  
7.83  
7.82  
7.65  
7.57  
7.55  
7.54  
7.53  
7.51

-2.80

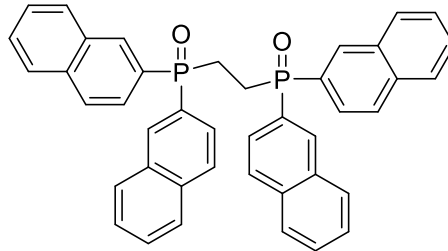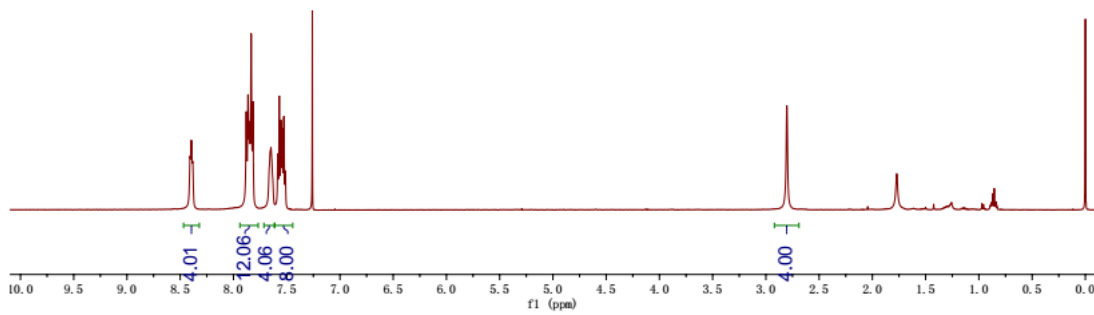

LKK-I-44C

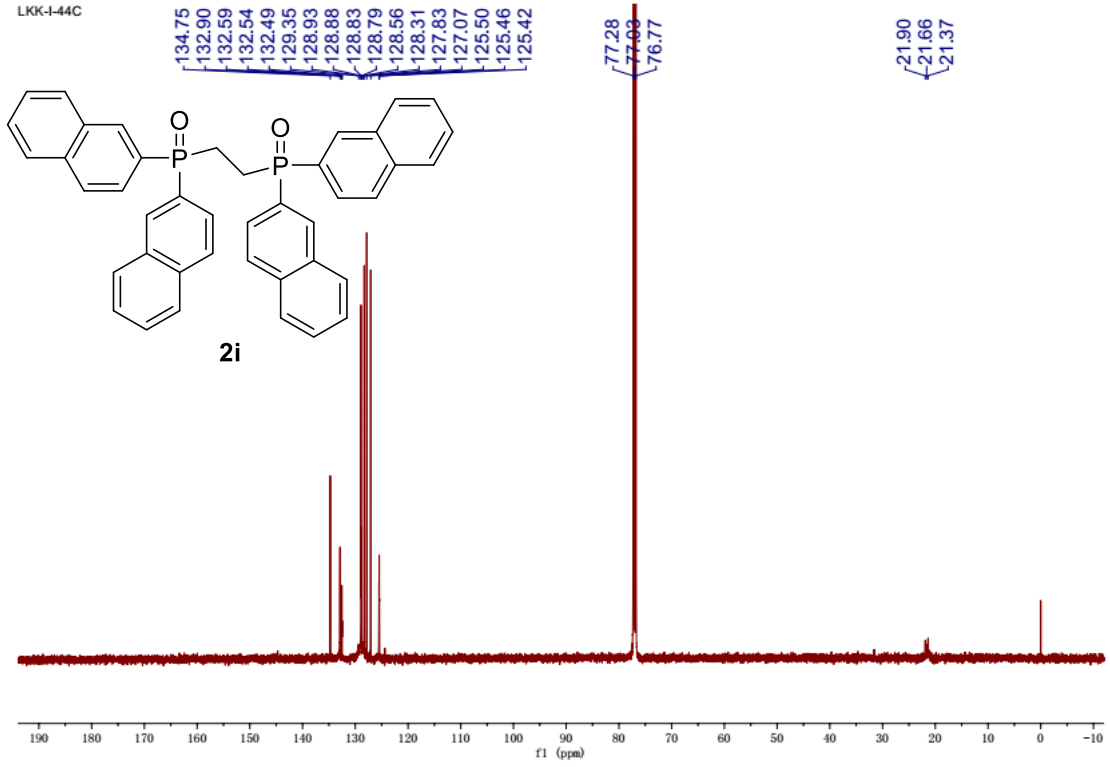

LKK-I-44C

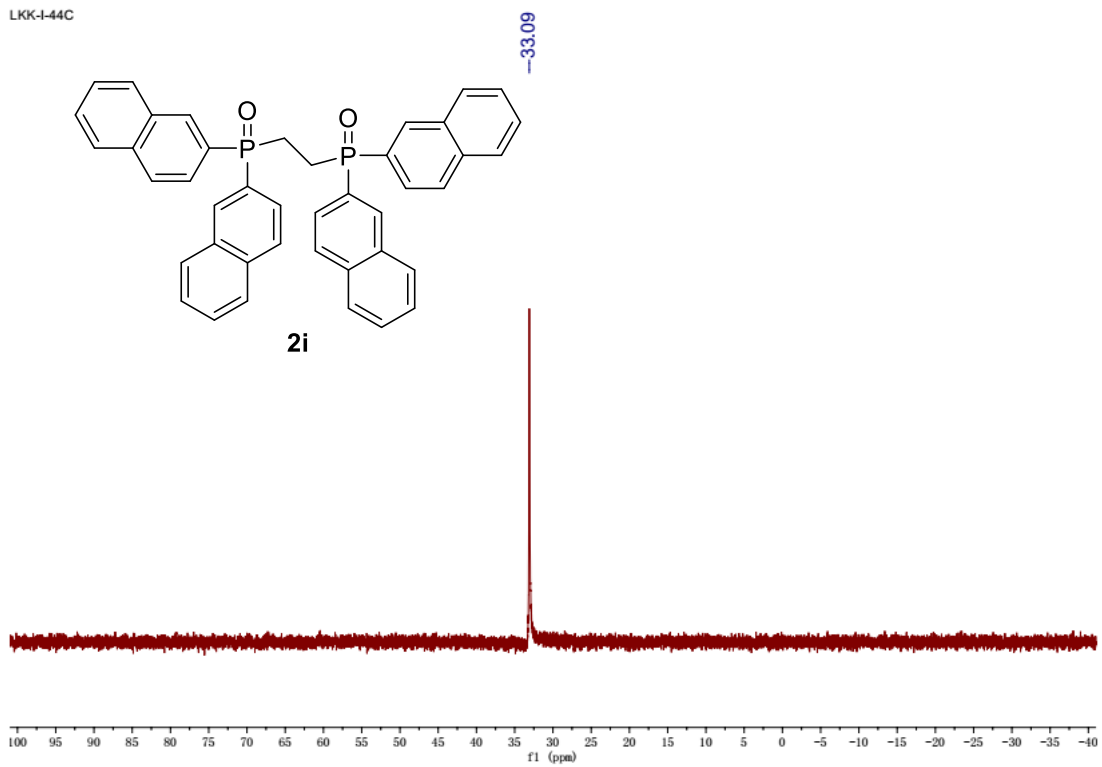



DJZ-I-263-1-PC

7.74  
7.74  
7.73  
7.59  
7.58  
7.58  
7.57  
7.20  
7.19  
7.19

2.61  
2.61

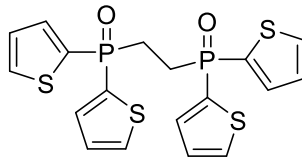

2j

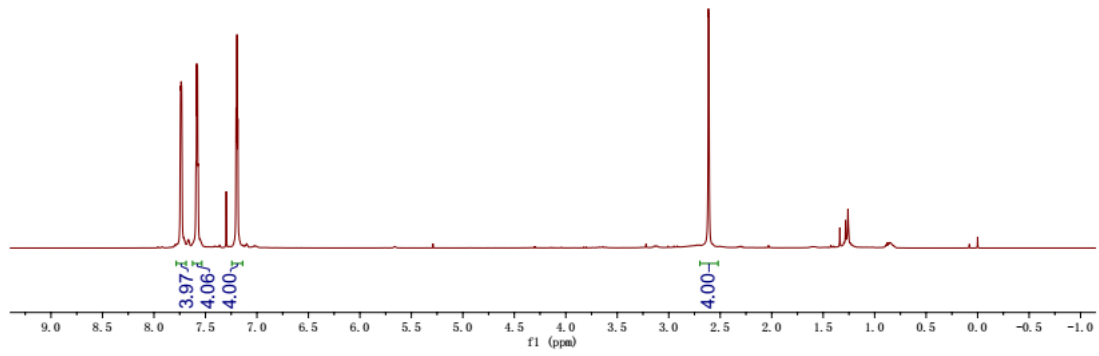

djz-i-265-1-p3

135.80  
135.75  
135.71  
133.95  
133.94  
133.29  
133.08  
132.61  
132.16  
131.94  
128.67  
128.61  
128.56

77.39  
77.13  
76.88

26.73  
26.43  
26.14  
25.84  
25.54

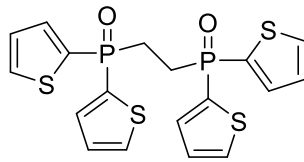

2j

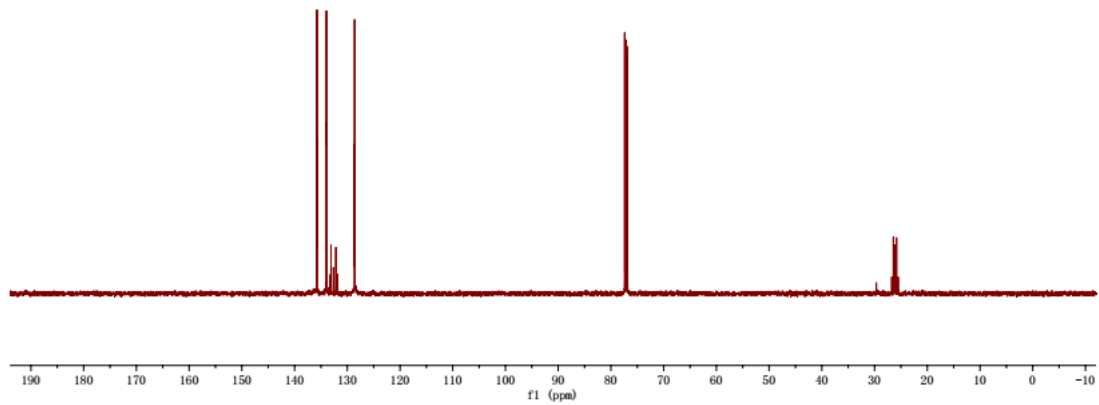

djz-i-265-1-p3

-21.85

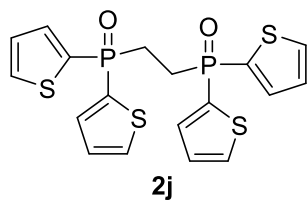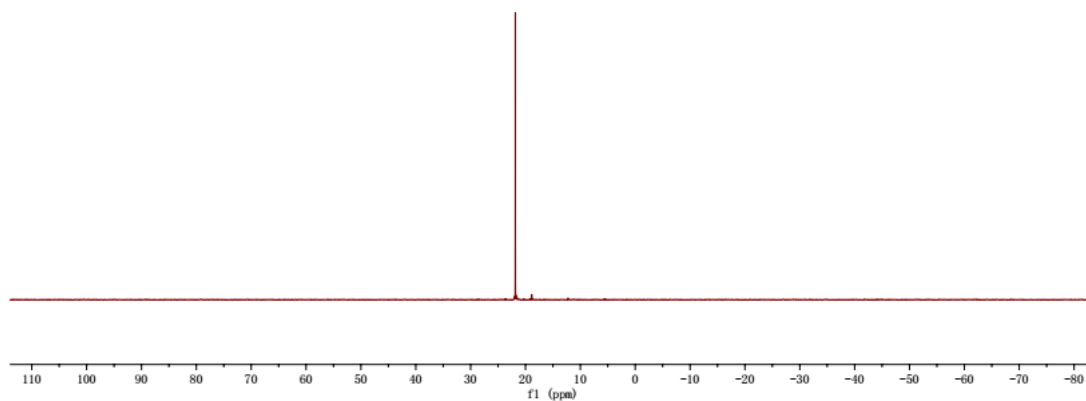

djz-i-254-2-pch

7.70  
7.55  
7.54  
7.52  
7.48  
7.47  
7.45  
7.16  
7.15  
7.13

-2.51

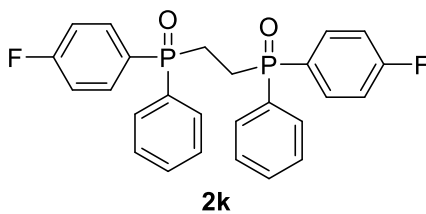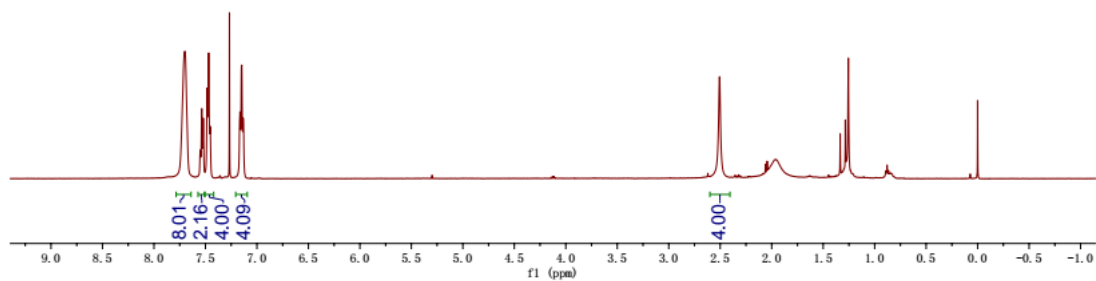

DJZ-I-254-2-P1CH

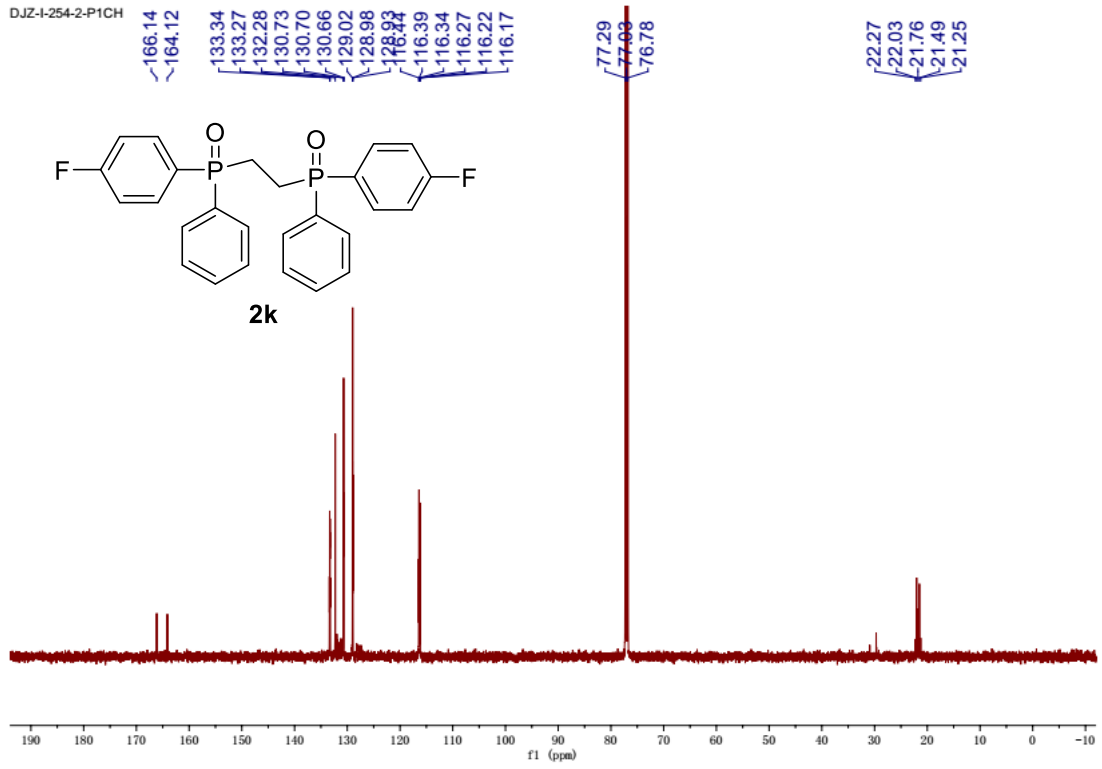

djz-i-254-2-p1ch单氟双膦

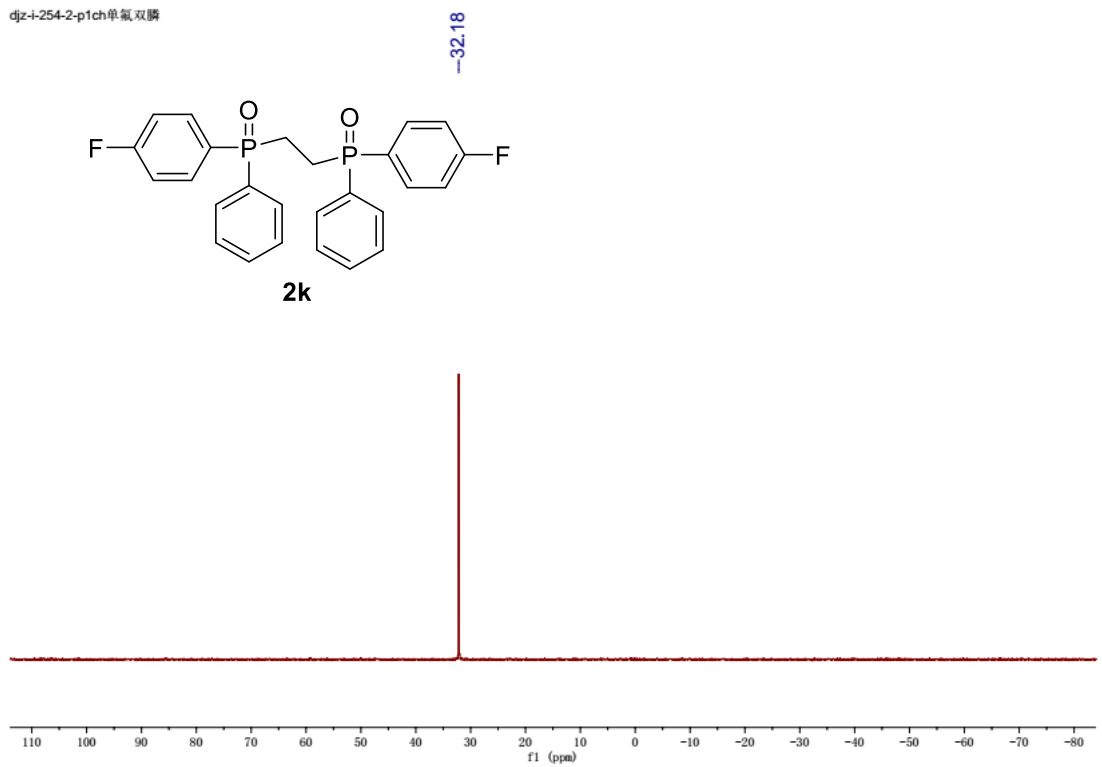

LKK-I-51B

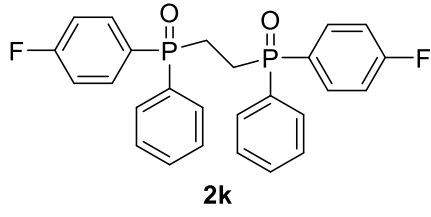

--106.13

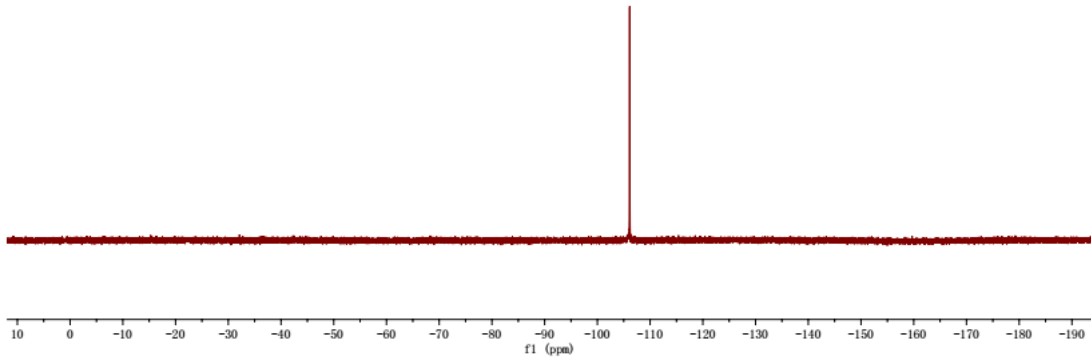

LKK-I-52B

7.69  
7.68  
7.64  
7.55  
7.54  
7.52  
7.48  
7.47  
7.45  
7.43

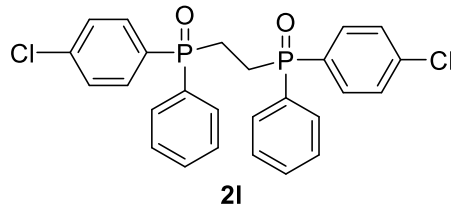

--2.49

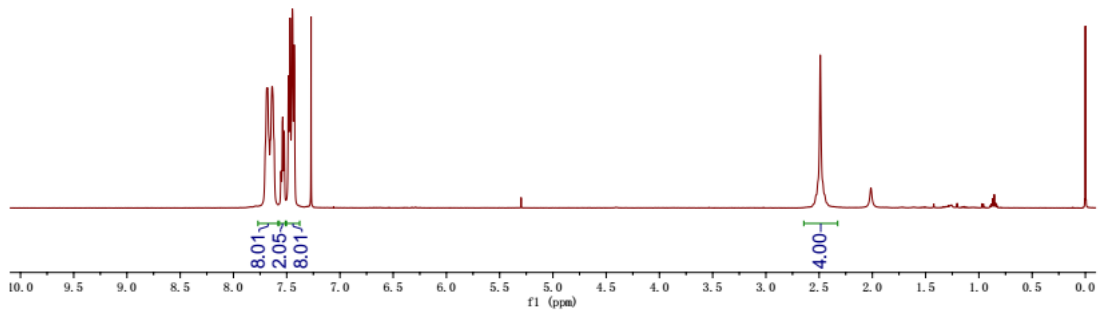

LKK-I-52B

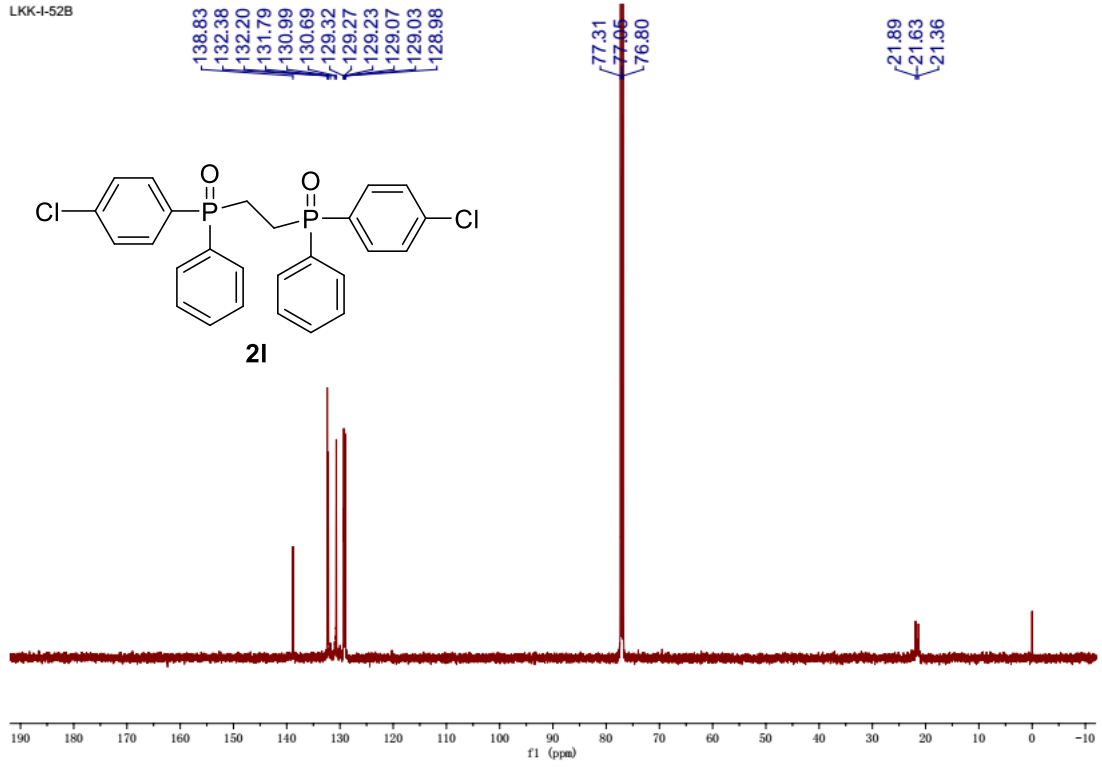

LKK-I-52B

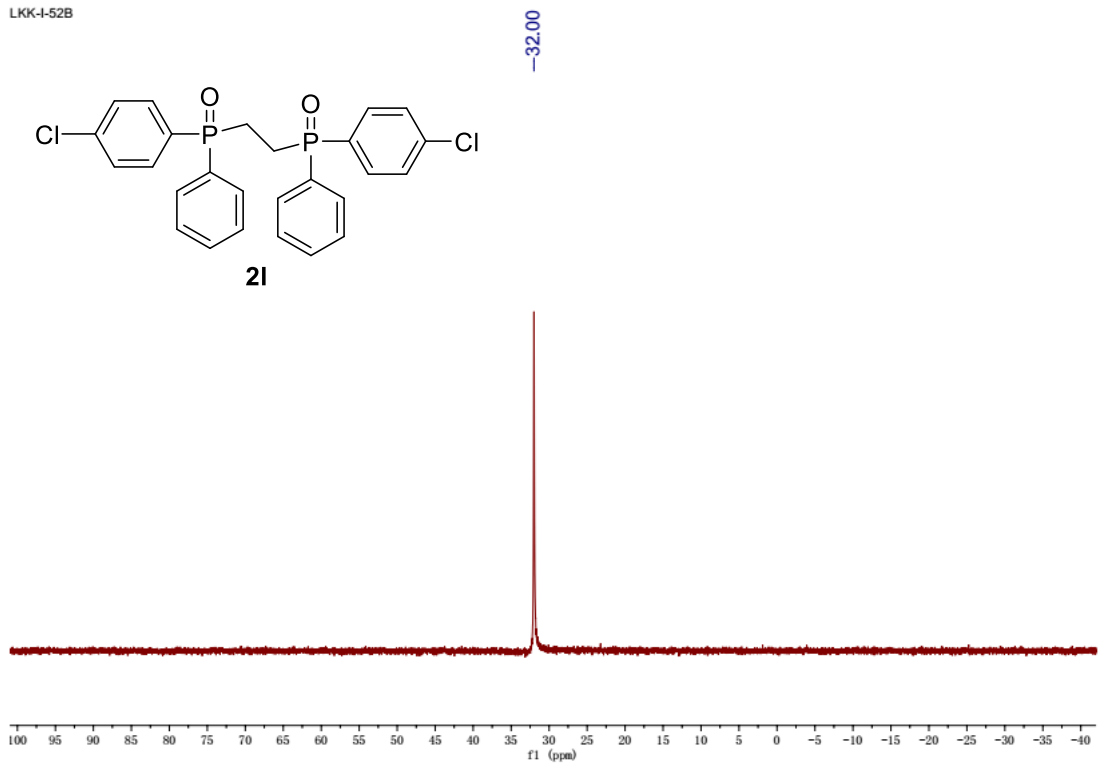

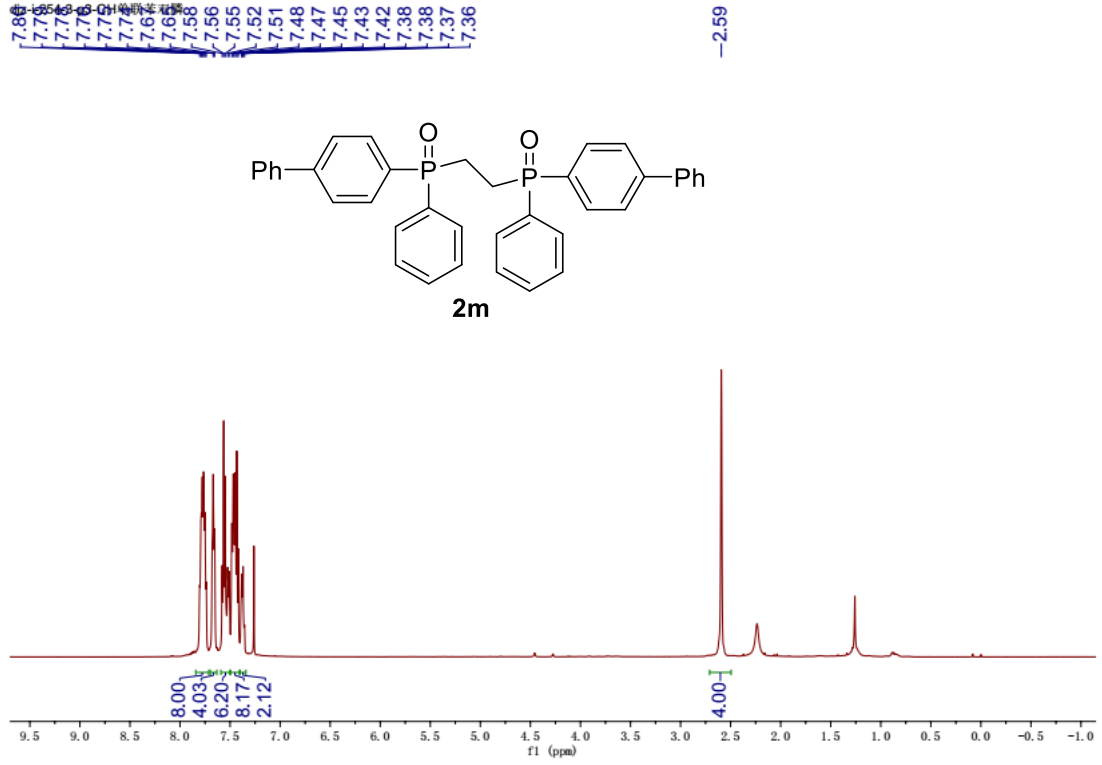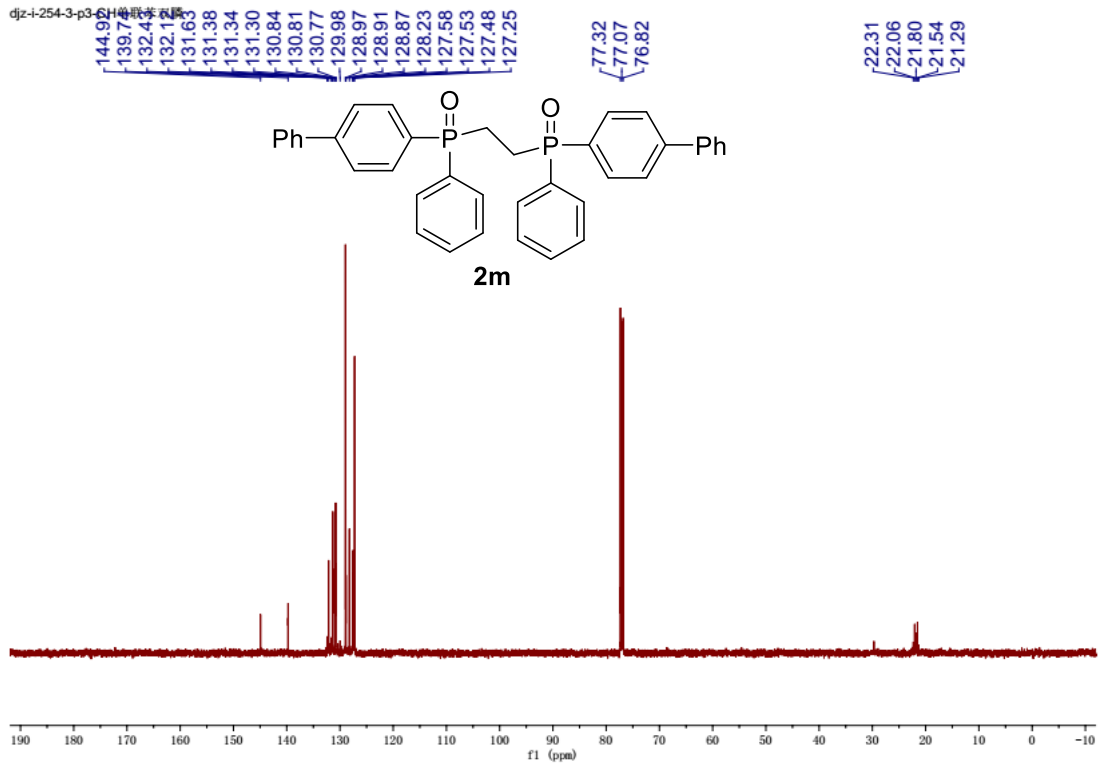

djz-i-254-3-p3-CH单联苯双膦

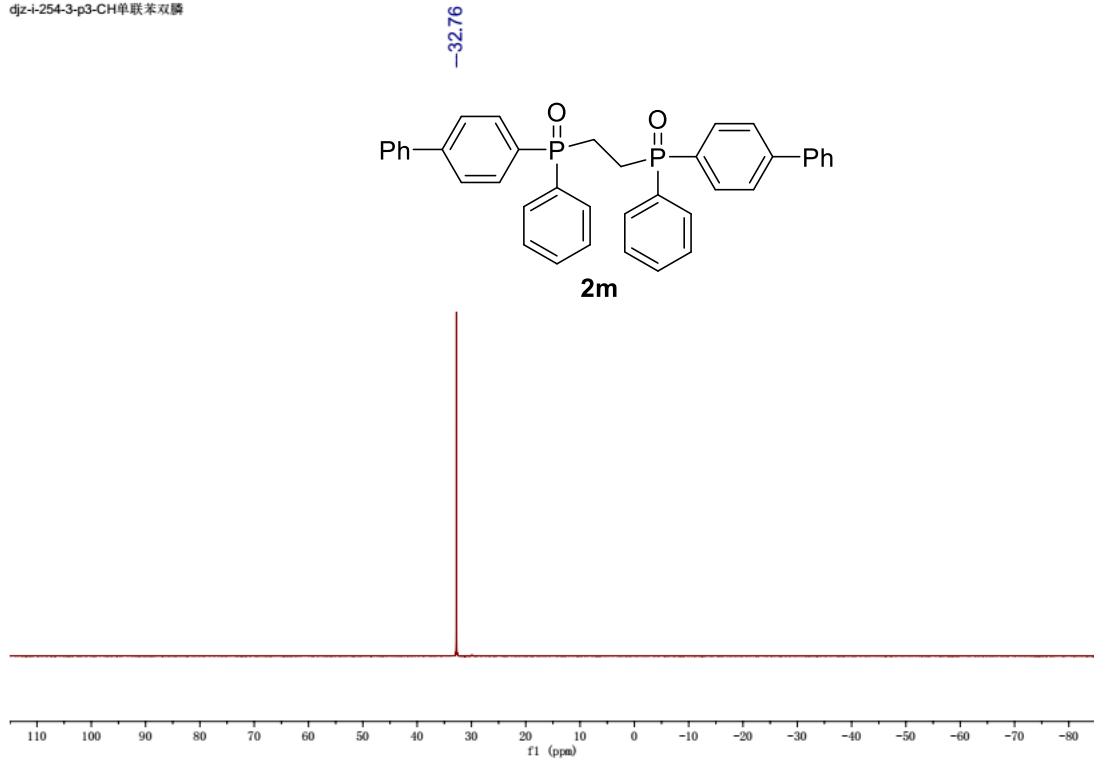

djz-i-255-1-PC

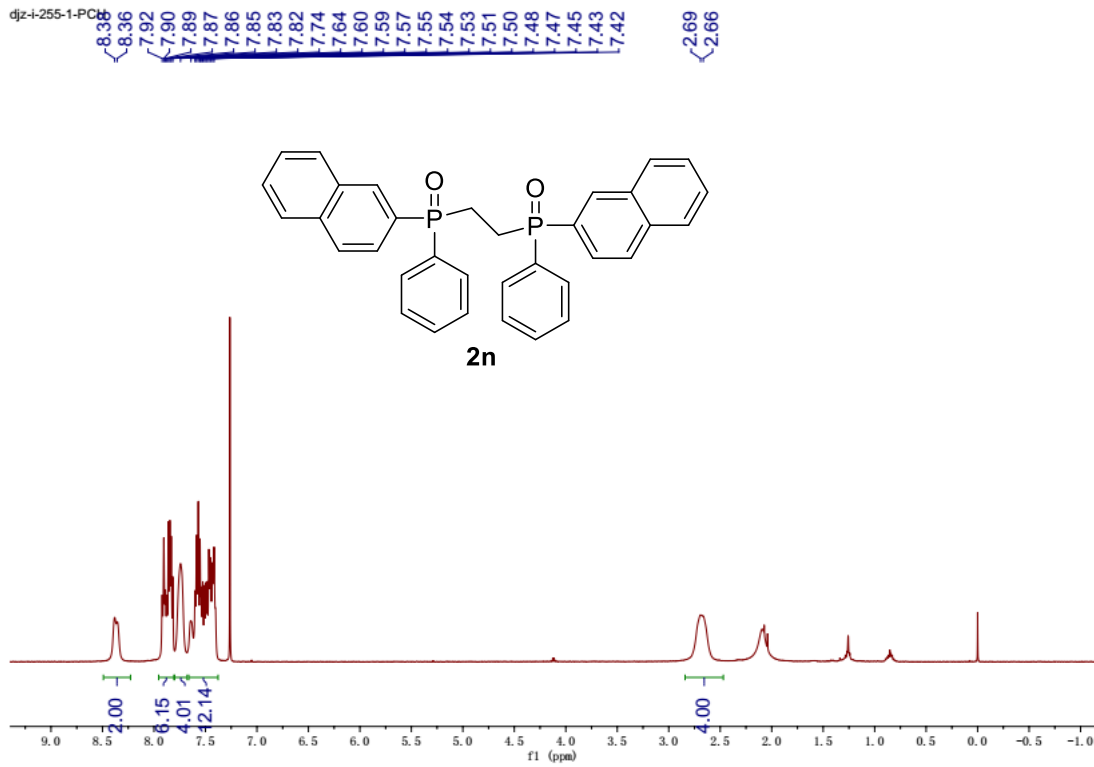

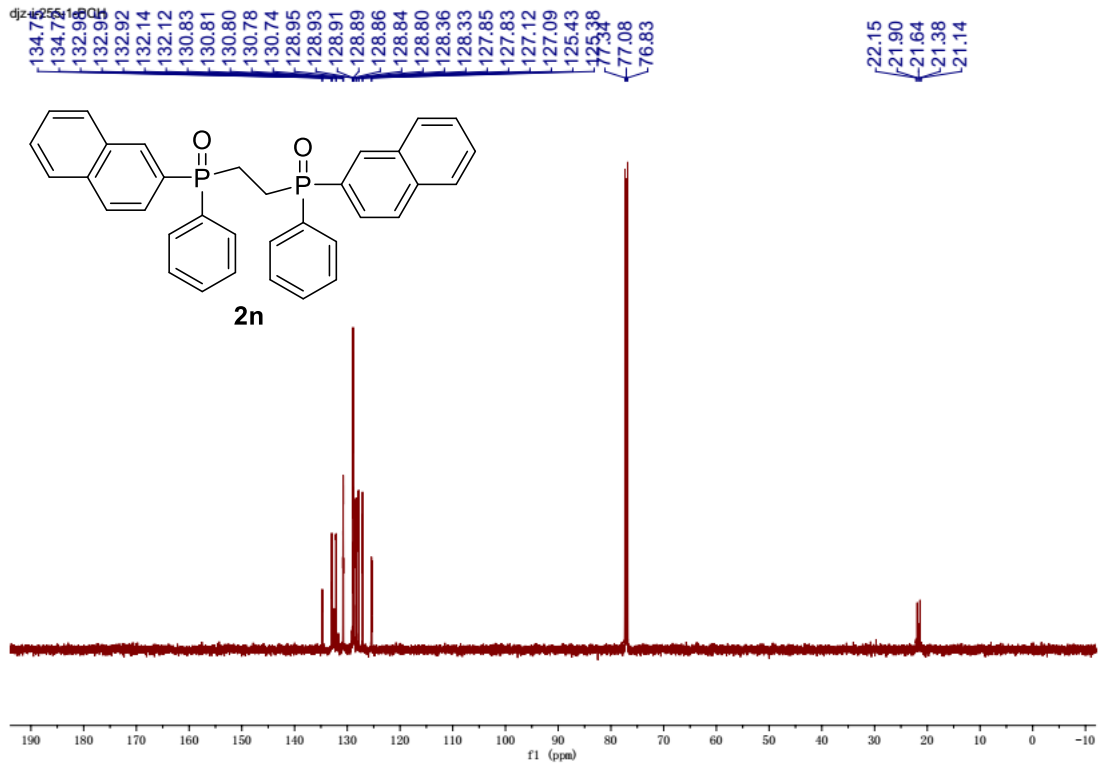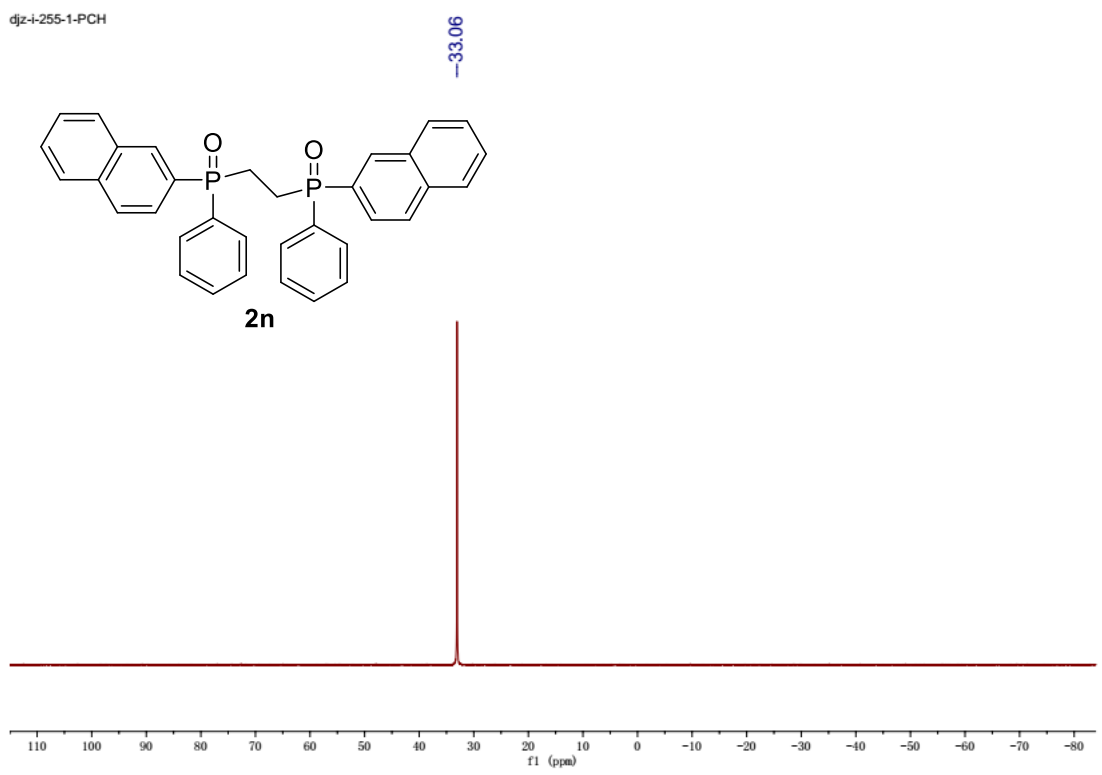



7.78  
7.78  
7.77  
7.77  
7.72  
7.70  
7.69  
7.58  
7.56  
7.54  
7.53  
7.51  
7.49  
7.48  
7.47  
7.45  
7.20  
7.19  
7.18  
7.17  
7.16  
2.67  
2.64  
2.61  
2.60  
2.57  
2.54  
2.52  
2.48  
2.46  
2.45

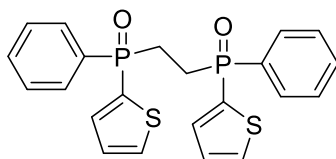

2o

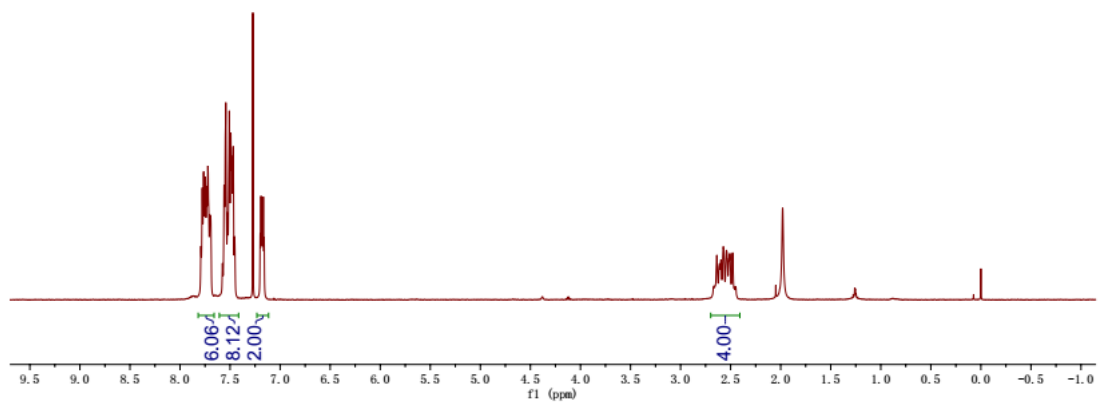

135.61  
135.56  
135.54  
135.49  
133.63  
133.62  
133.14  
132.44  
132.41  
132.28  
132.08  
131.23  
130.74  
130.70  
130.66  
130.63  
128.97  
128.92  
128.89  
128.84  
128.61  
128.59  
128.56  
128.54  
128.51  
128.48  
77.32  
77.07  
76.81  
24.54  
24.26  
23.99  
23.71  
23.43

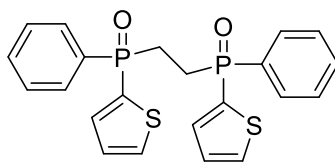

2o

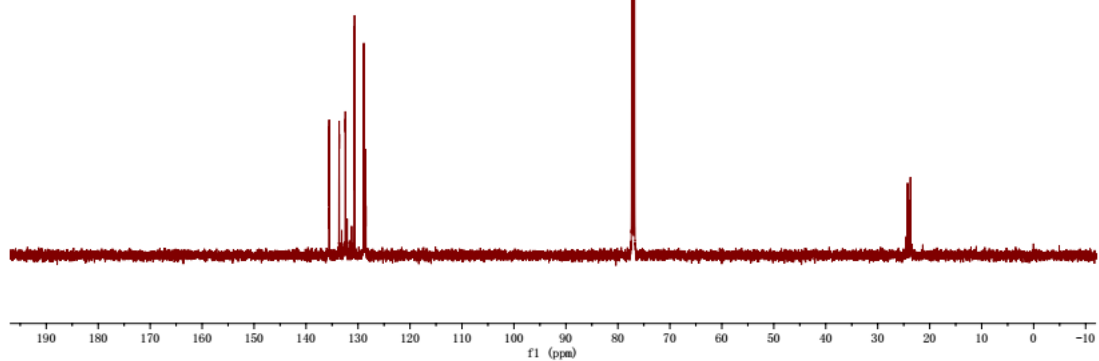

-27.56

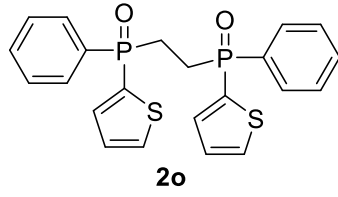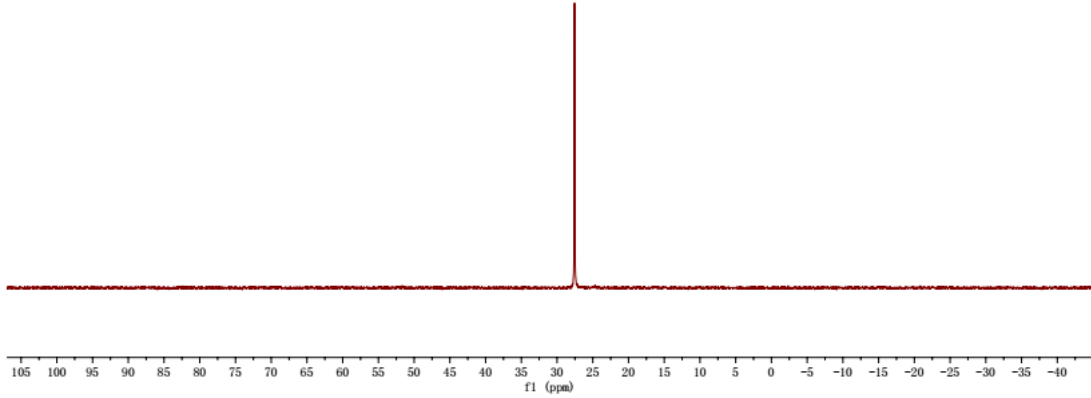

LKK-188-2  
7.71  
7.70  
7.70  
7.73  
7.52  
7.50  
7.49  
7.47  
7.46  
3.87  
3.87  
3.86  
3.85  
3.82  
3.81  
3.79  
3.78  
3.72  
3.70  
3.69  
3.67  
2.53  
2.51  
2.29  
2.27  
2.26  
1.98  
1.97  
1.95  
1.94  
1.93  
1.89  
1.88  
1.87  
1.85  
1.84  
1.82  
1.81  
1.75  
1.74  
1.73  
1.72  
1.71  
1.70  
1.47  
1.46  
1.45  
1.44  
1.43

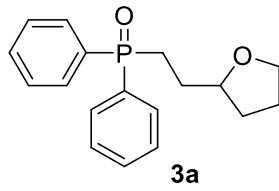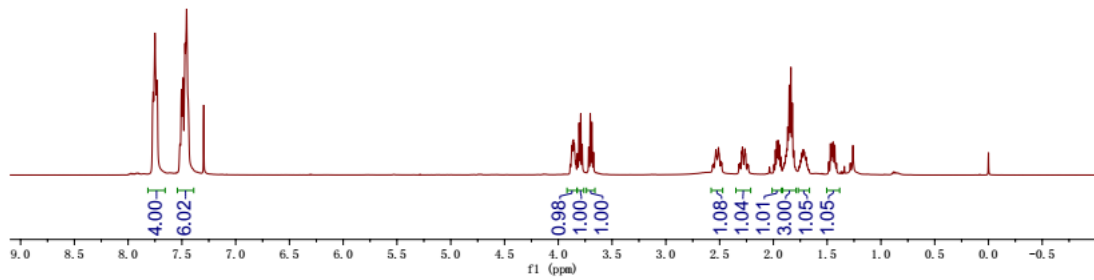

LKK-I-22A-1

133.53  
133.17  
132.76  
132.38  
131.69  
131.67  
130.86  
130.79  
130.75  
130.68  
128.68  
128.58

79.21  
79.09  
77.37  
77.12  
76.86  
67.69

31.01  
27.32  
27.30  
26.80  
26.22  
25.64

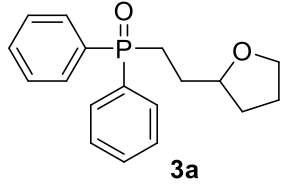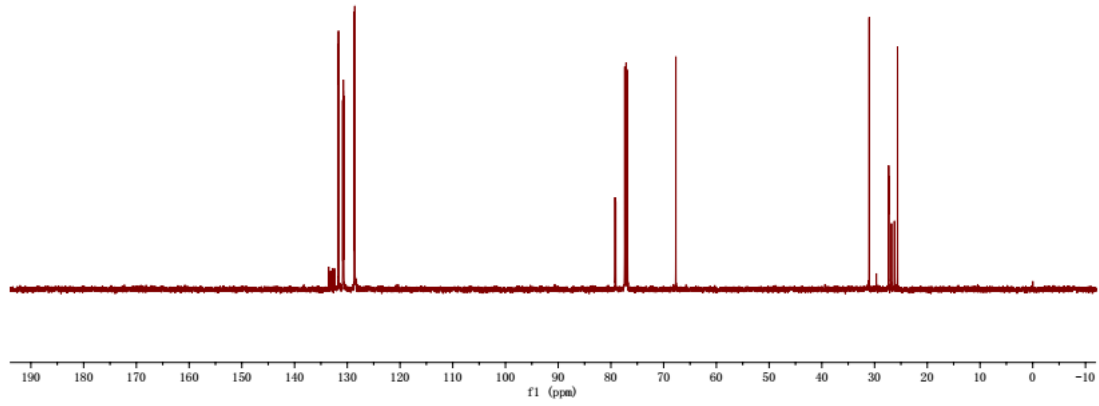

LKK-I-22A-1

-33.02

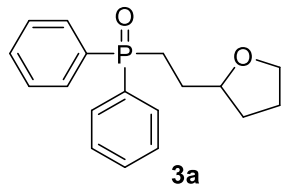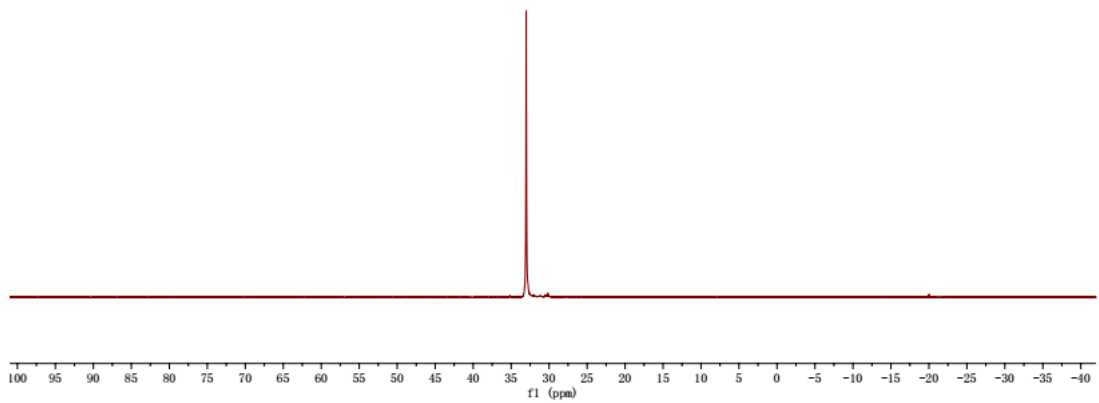

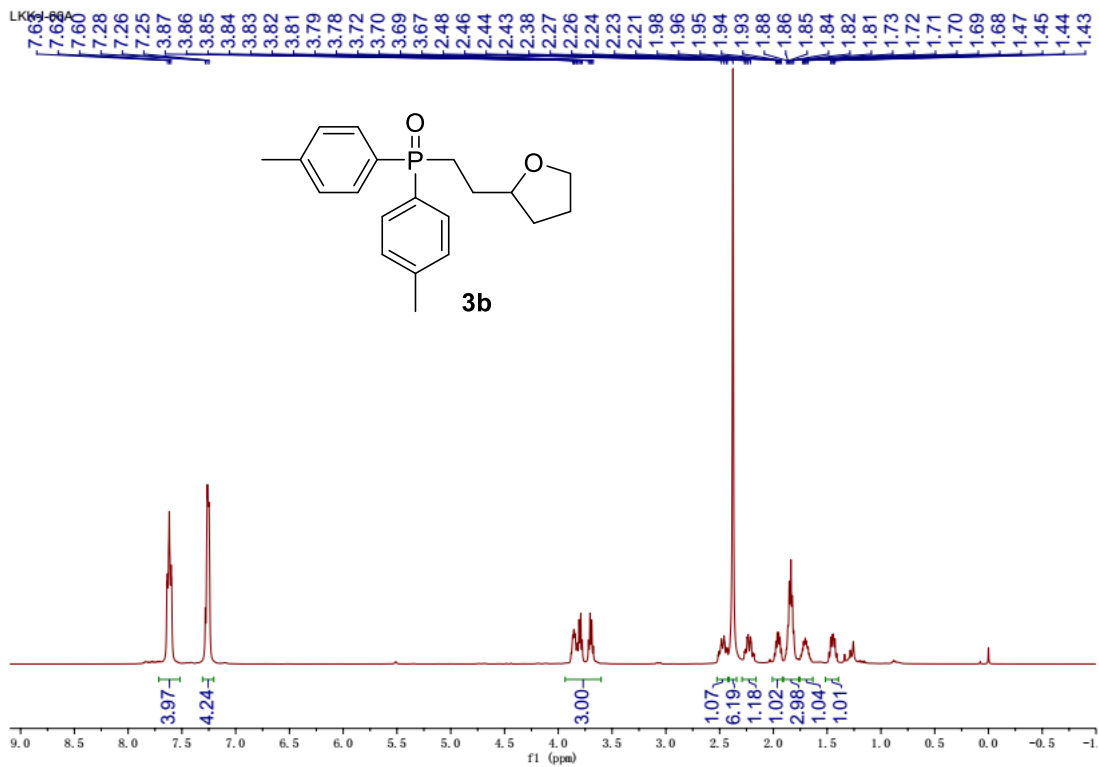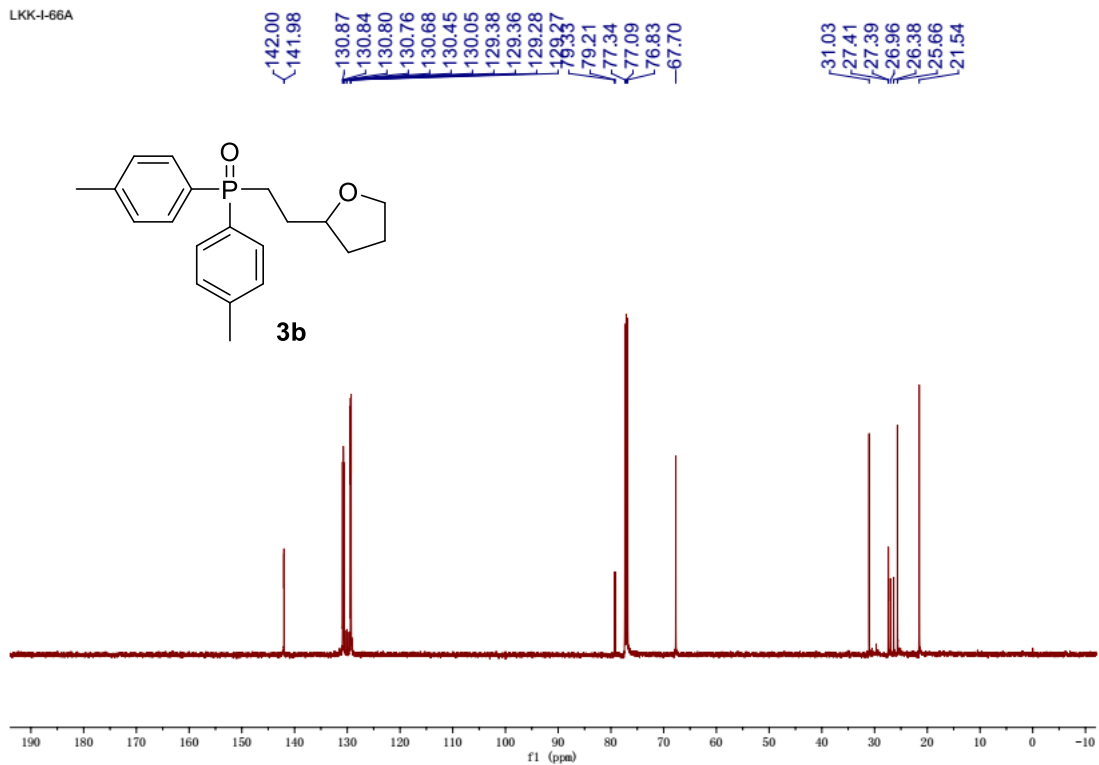

LKK-I-66A

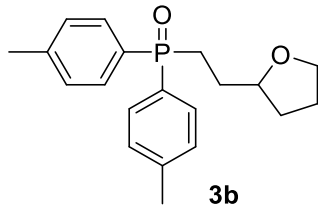

-33.08

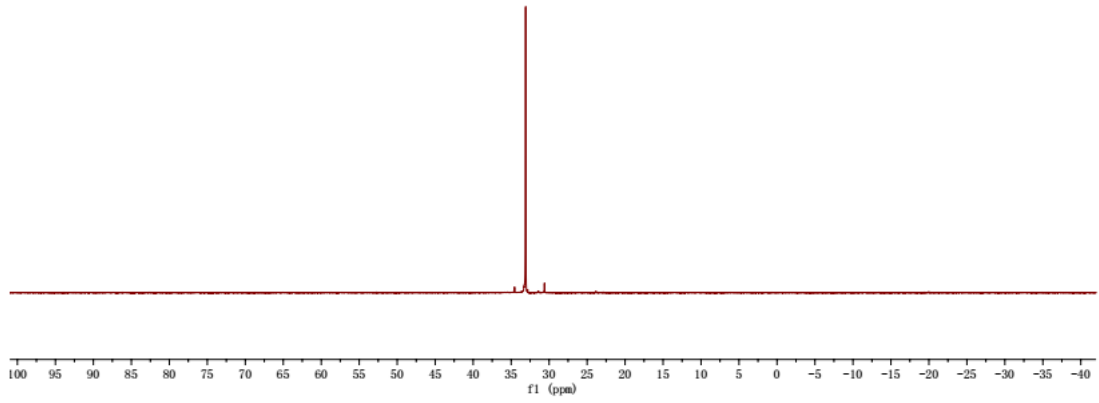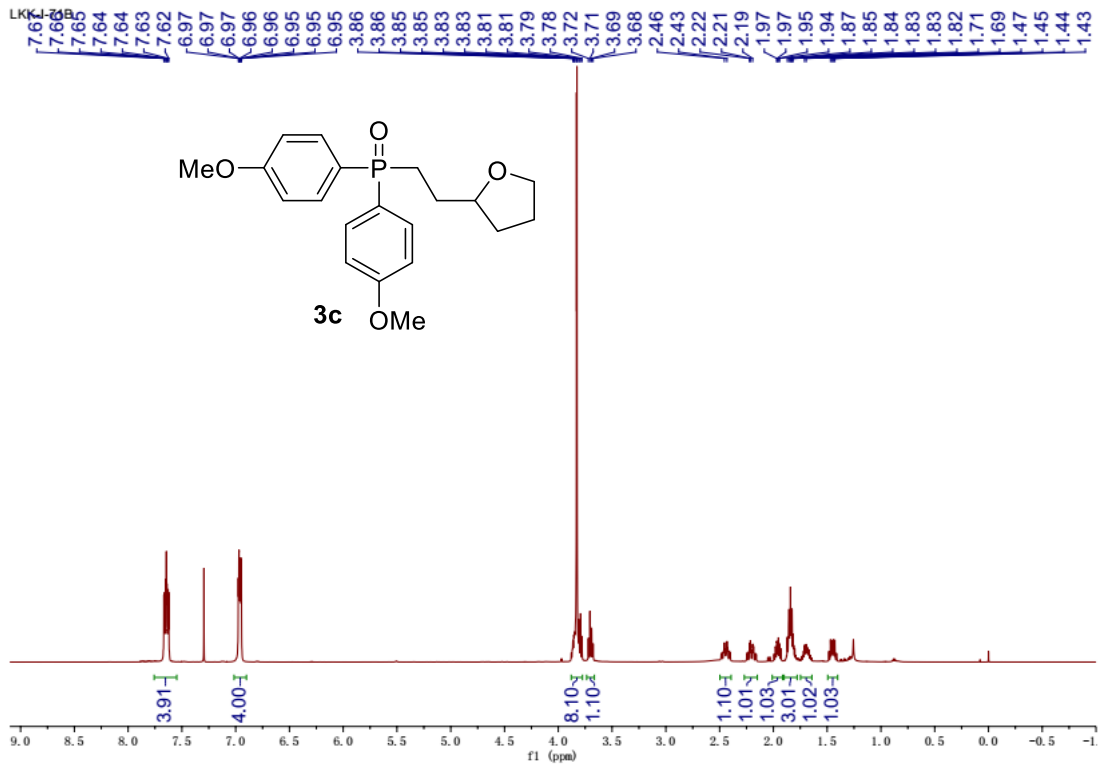

LKK-I-71B

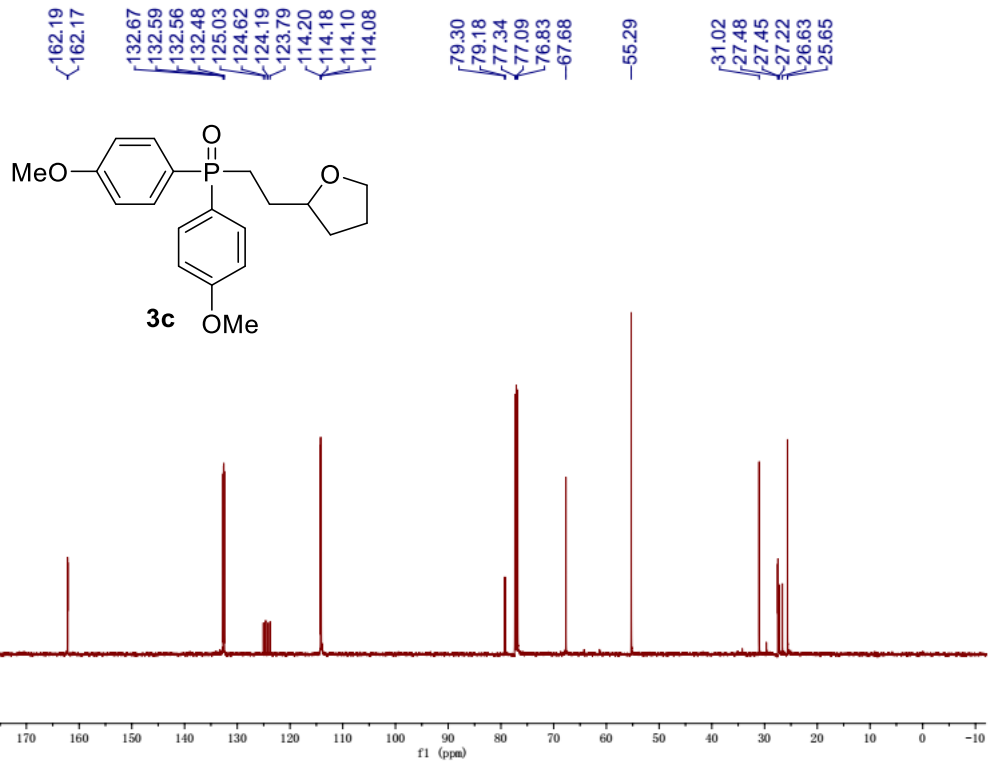

LKK-I-71B

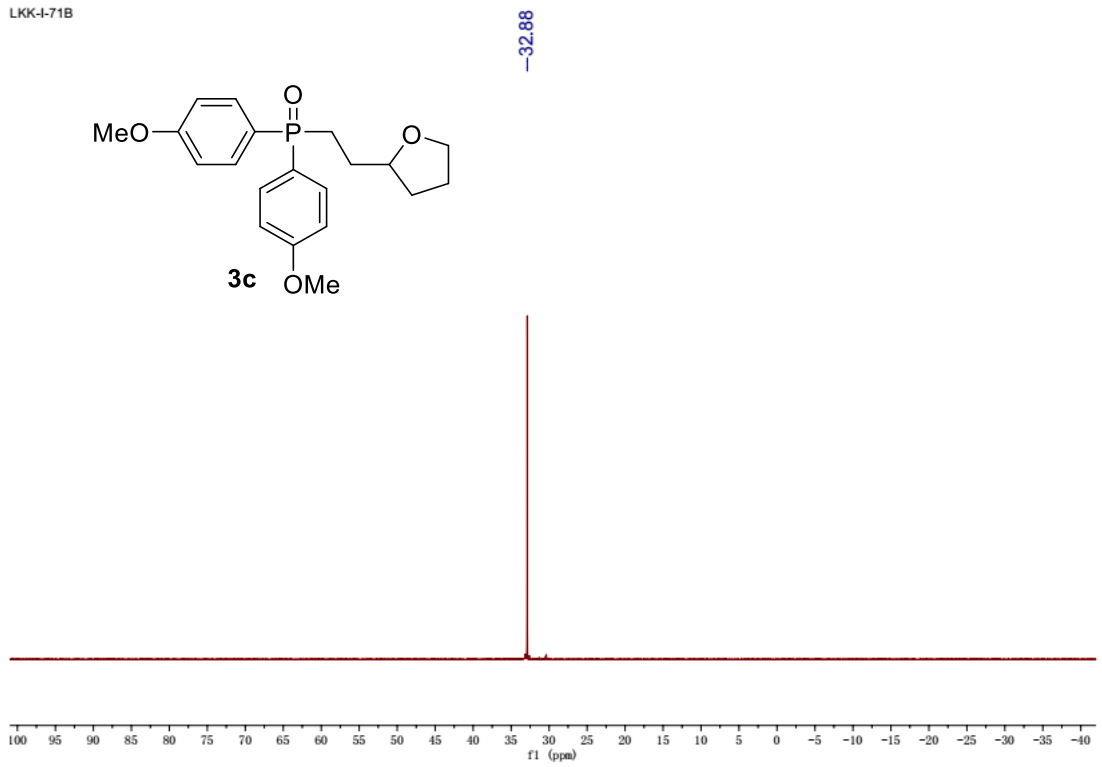

LKK-I-68A  
 7.76  
7.75  
7.74  
7.74  
7.73  
7.72  
7.72  
7.71  
7.70  
7.19  
7.19  
7.18  
7.18  
7.17  
7.17  
7.16  
7.16  
7.15  
7.15  
7.14  
3.87  
3.86  
3.85  
3.84  
3.83  
3.81  
3.80  
3.78  
3.72  
3.71  
3.69  
2.49  
2.27  
2.00  
1.98  
1.97  
1.96  
1.88  
1.88  
1.87  
1.85  
1.84  
1.83  
1.47  
1.45  
1.43

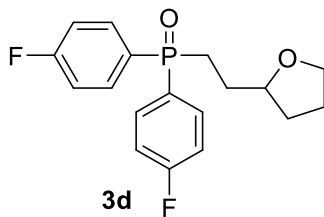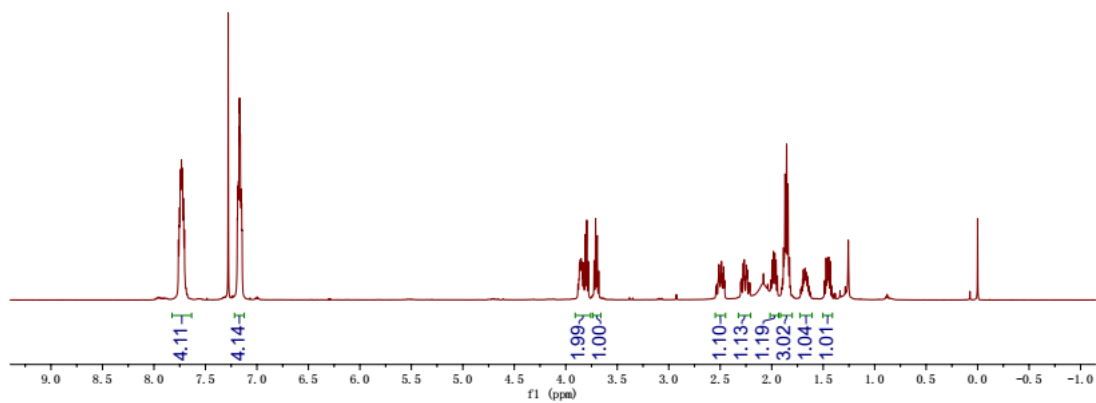

LKK-I-68A

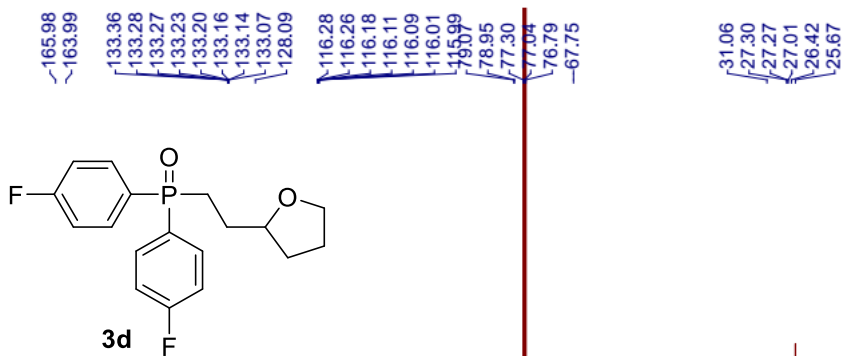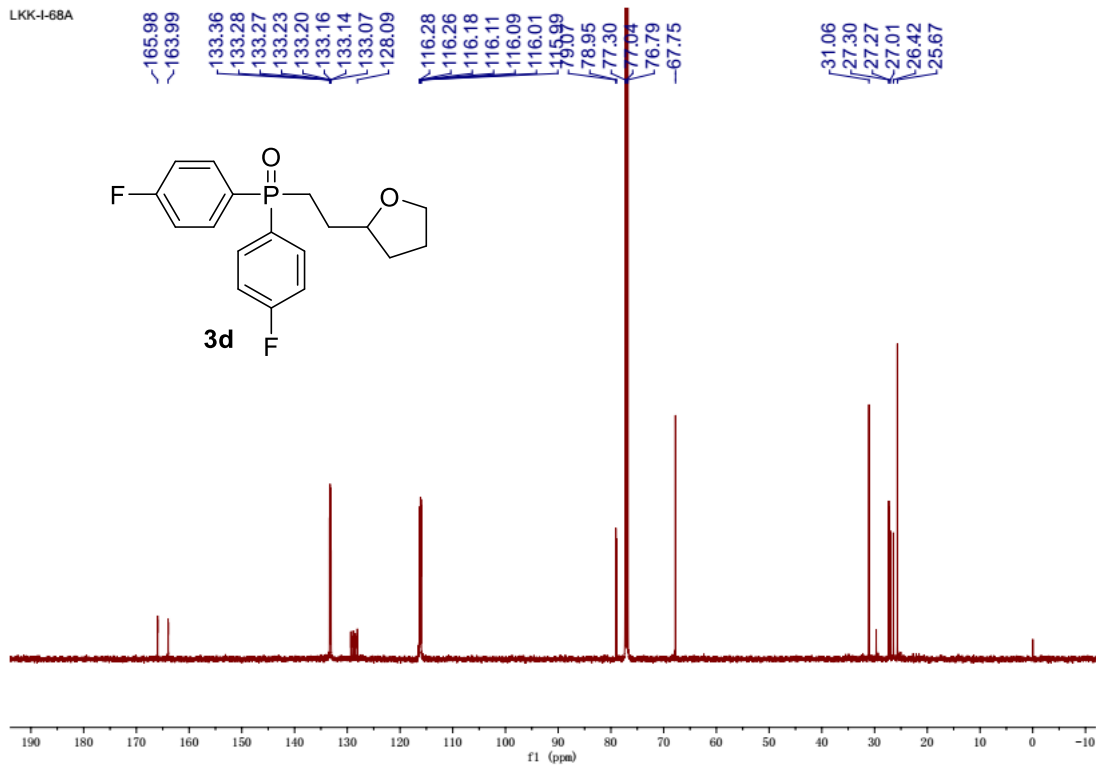

LKK-I-68A

-31.89

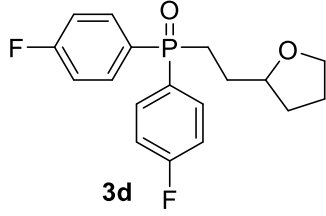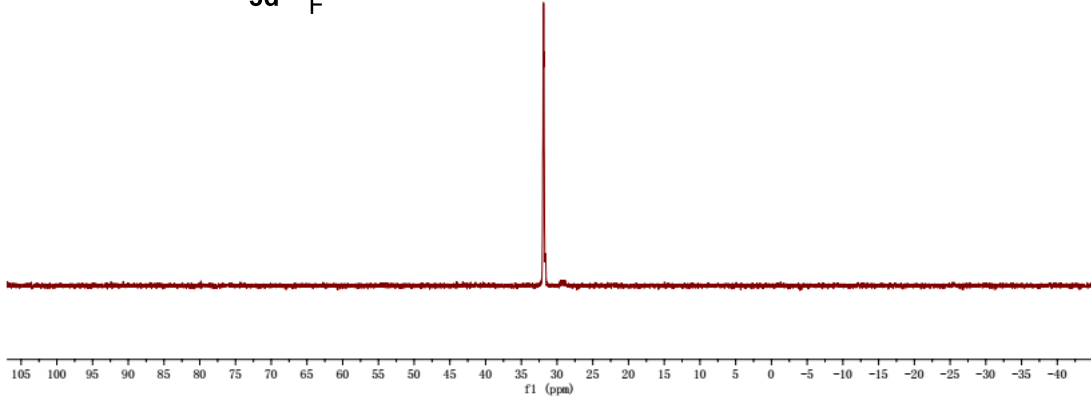

LKK-I-68A

-106.66

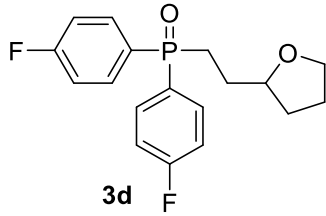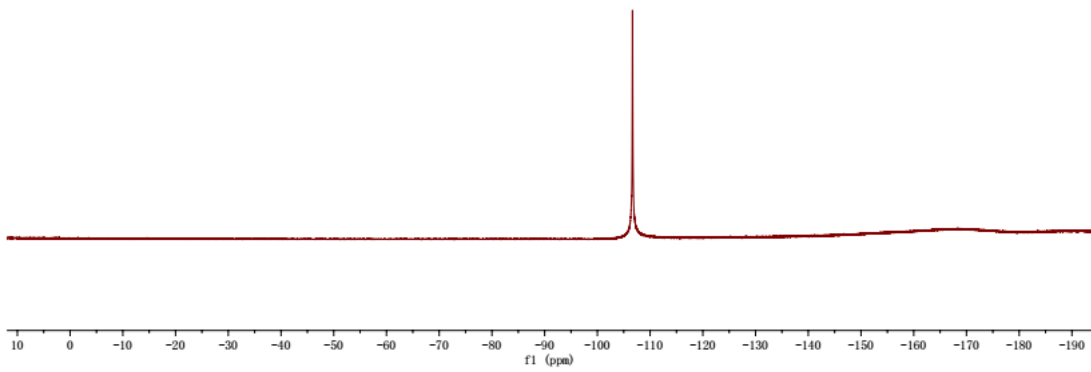



LKK-1-66B

7.66  
7.66  
7.67  
7.66  
7.65  
7.64  
7.47  
7.46  
7.46  
7.46  
7.45  
7.45  
7.44  
3.86  
3.85  
3.84  
3.82  
3.81  
3.79  
3.78  
3.72  
3.71  
3.69  
2.54  
2.52  
2.51  
2.51  
2.50  
2.49  
2.28  
2.27  
2.25  
1.99  
1.98  
1.97  
1.95  
1.88  
1.87  
1.85  
1.84  
1.83  
1.67  
1.47  
1.44  
1.43

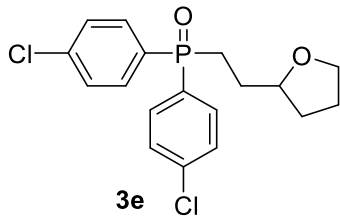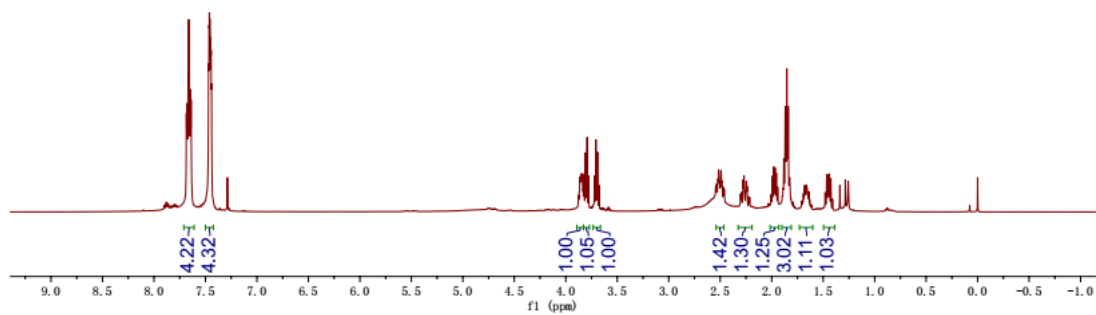

LKK-1-66B

138.60  
138.58  
132.23  
132.14  
132.10  
132.02  
131.62  
131.22  
130.82  
130.42  
129.21  
129.19  
129.12  
129.10  
78.99  
78.87  
77.32  
77.06  
76.81  
67.75  
31.06  
27.23  
27.20  
26.66  
26.08  
25.66

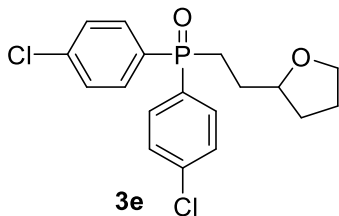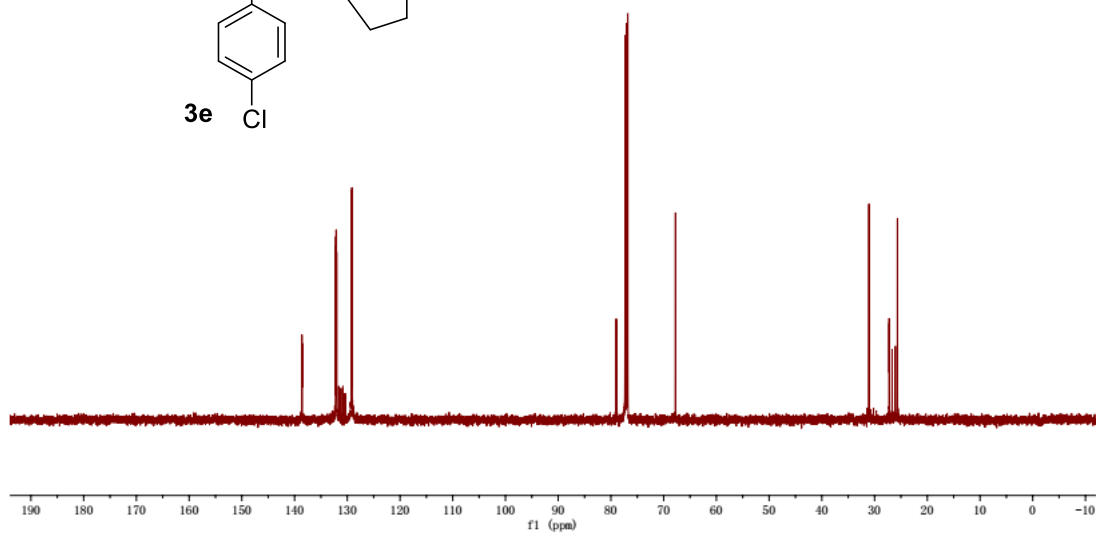

LKK-I-66B

-32.17

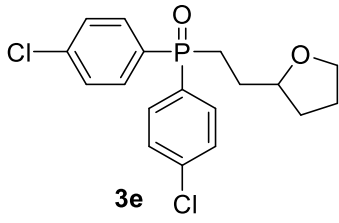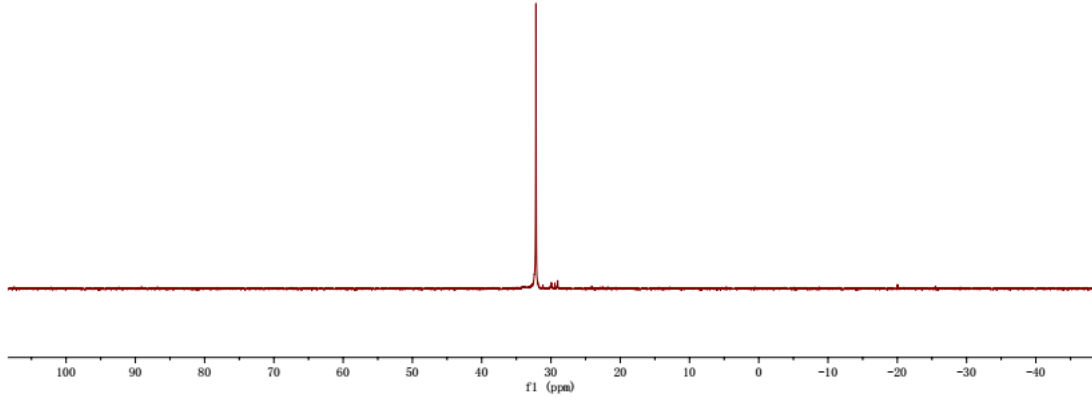

LKK-I-66B  
7.84  
7.83  
7.77  
7.70  
7.69  
7.69  
7.68  
7.60  
7.60  
7.59  
7.58  
7.46  
7.45  
7.43  
7.39  
7.38  
7.36  
3.91  
3.90  
3.89  
3.83  
3.82  
3.80  
3.74  
3.72  
3.71  
2.58  
2.35  
2.33  
1.99  
1.99  
1.98  
1.97  
1.95  
1.87  
1.85  
1.84  
1.78  
1.50  
1.49  
1.48

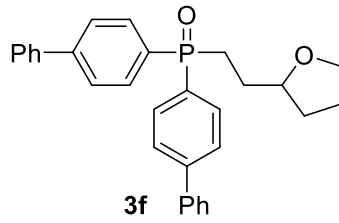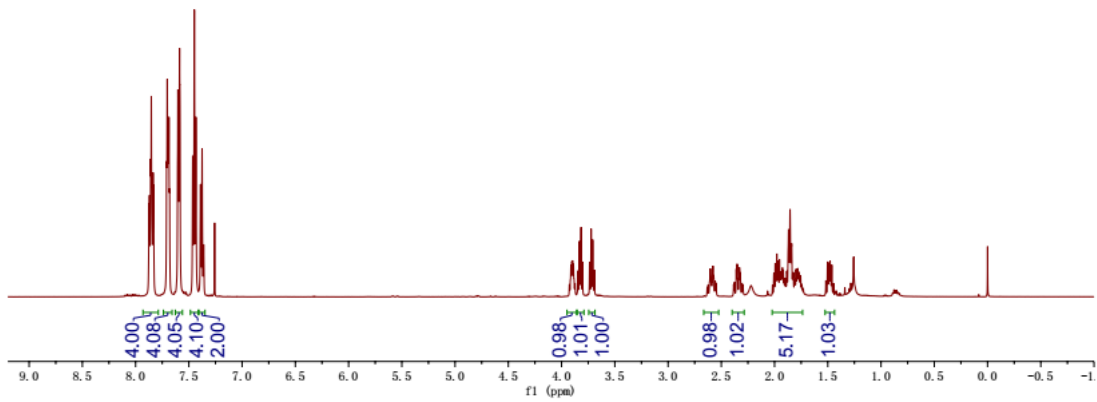

LKK-I-76C

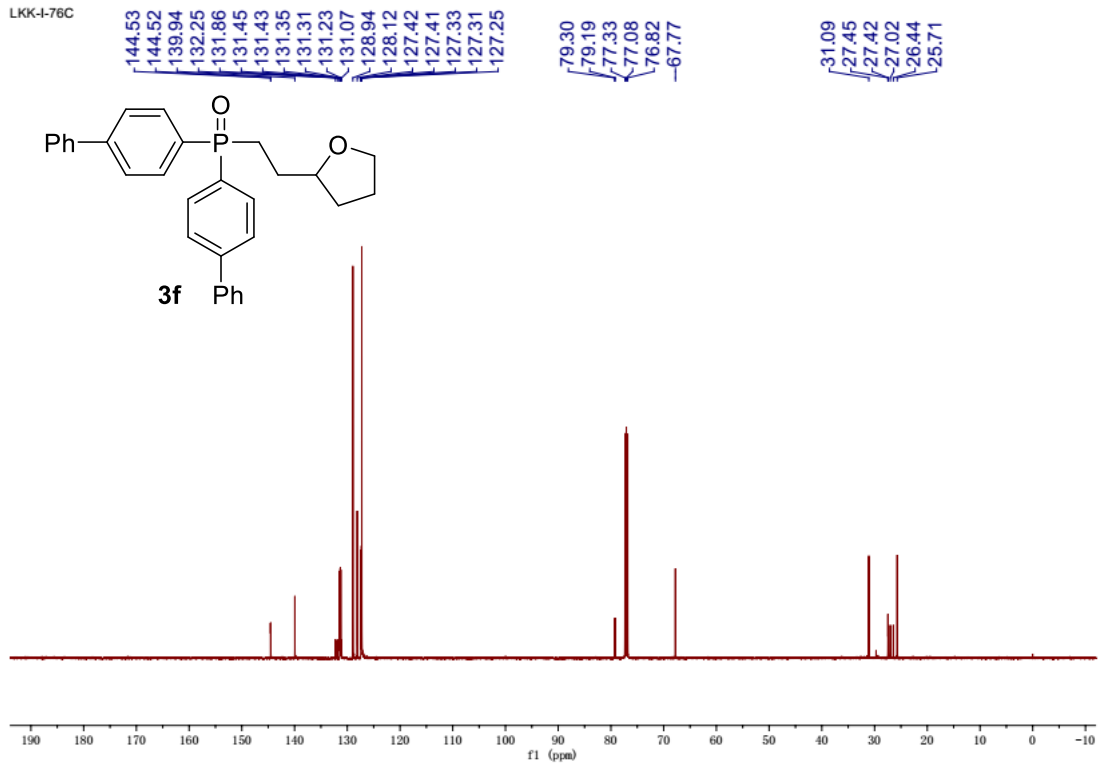

LKK-I-76C

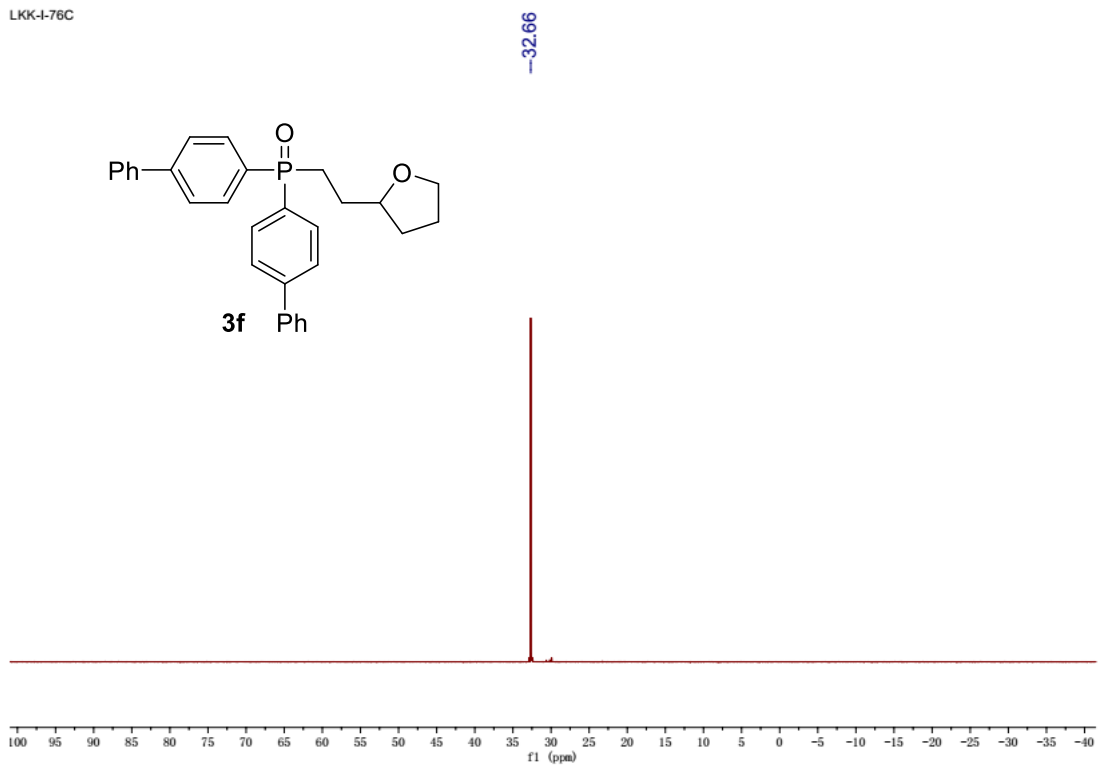

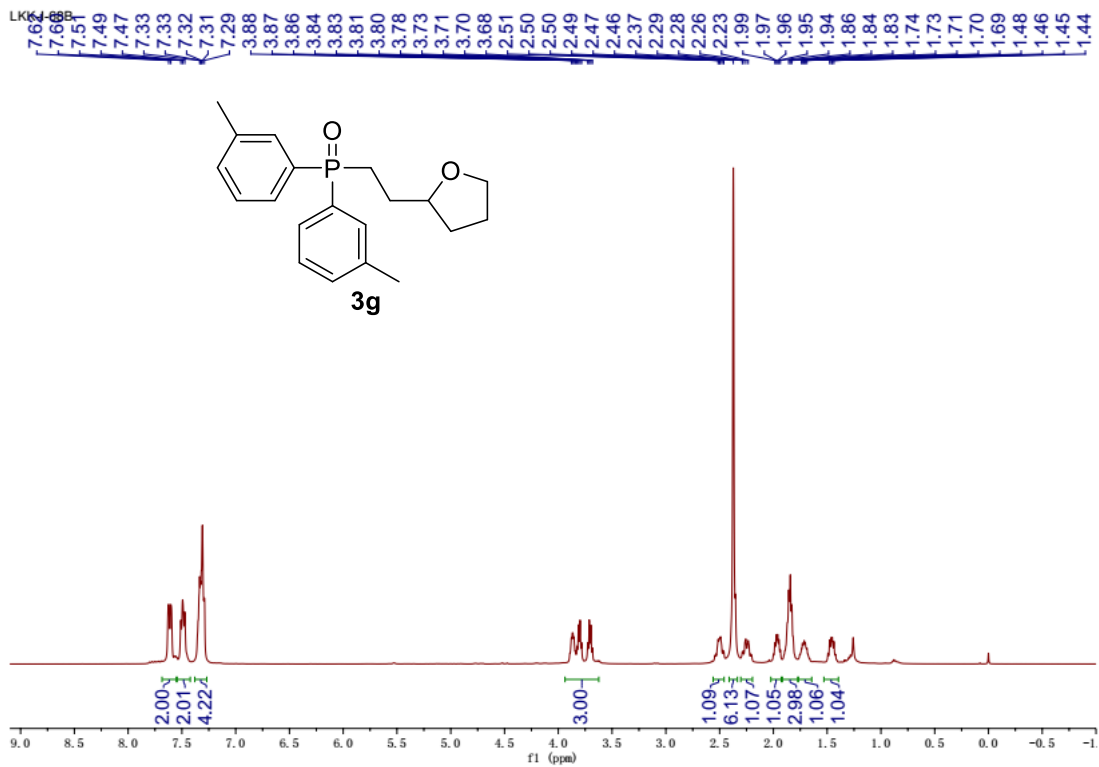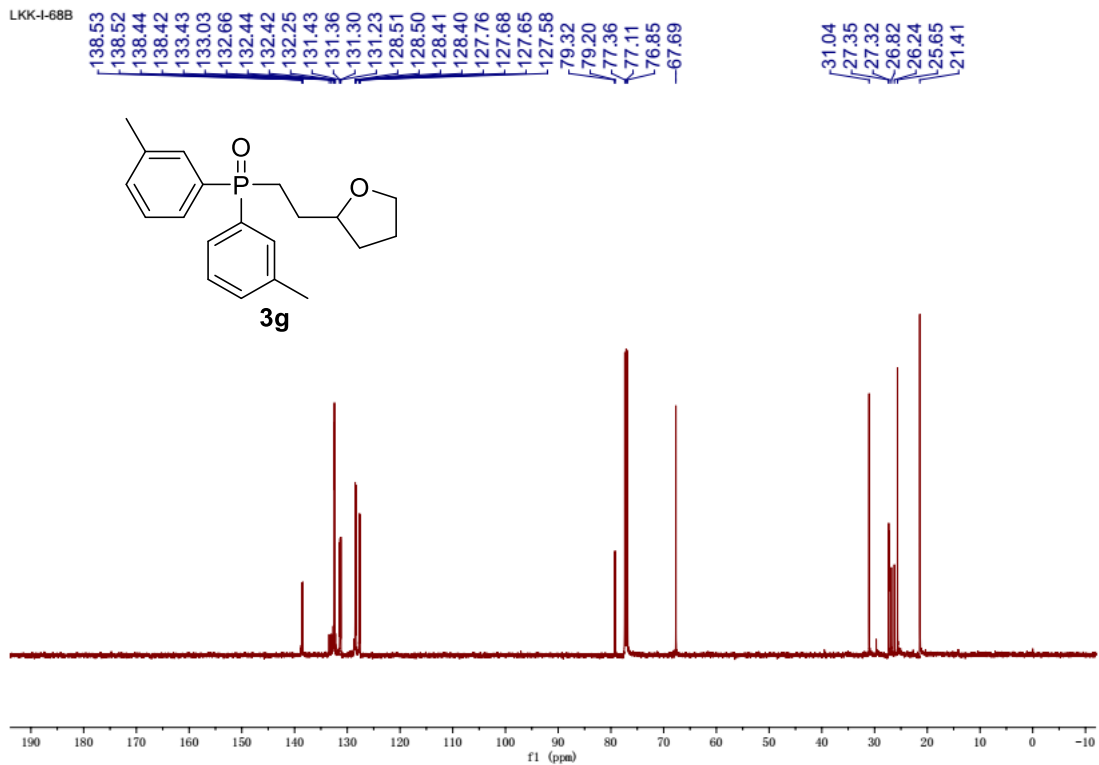

LKK-I-68B

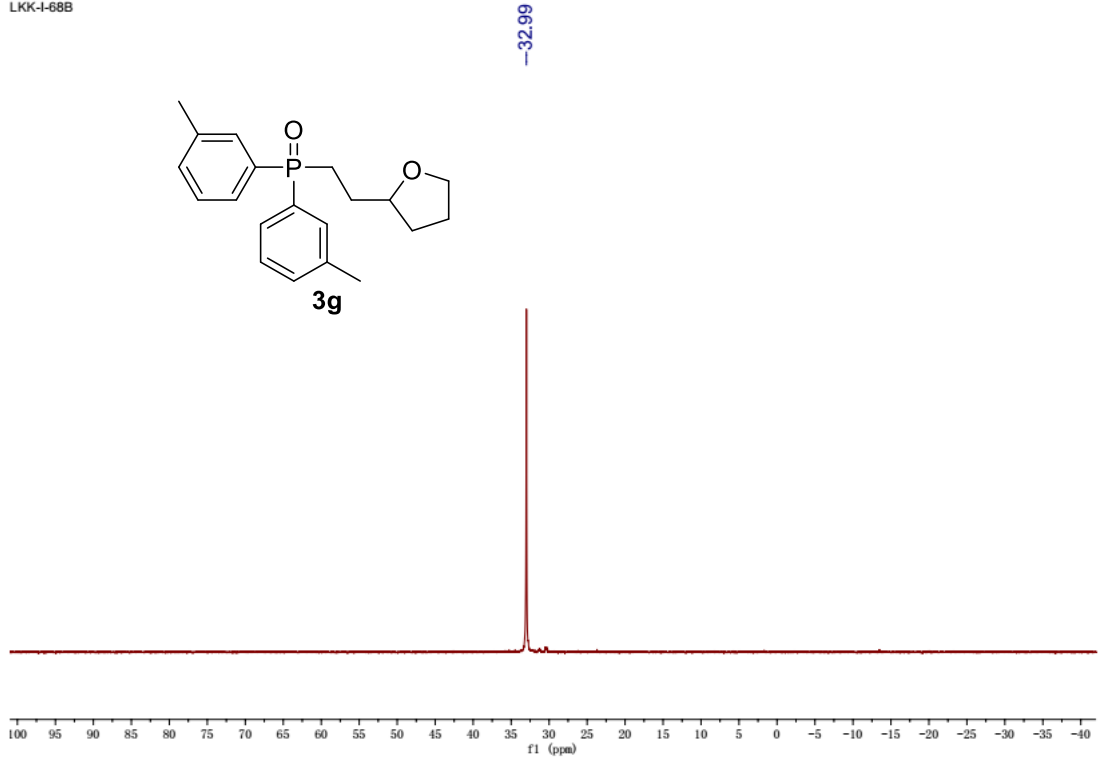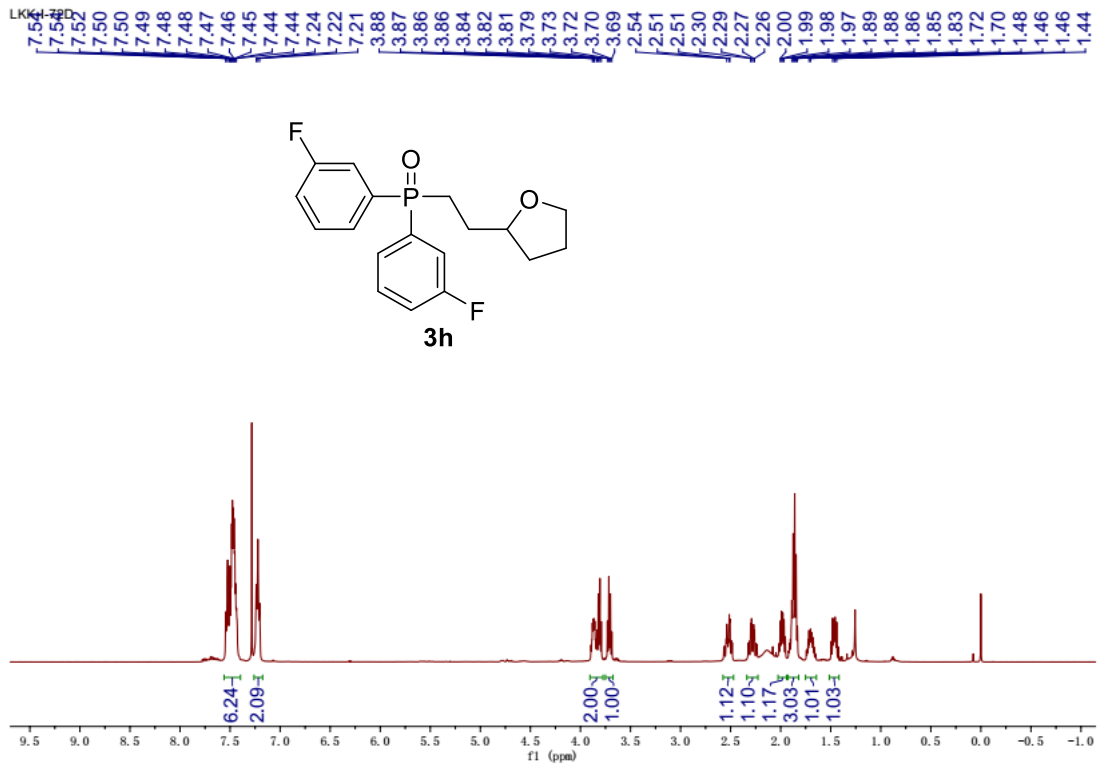

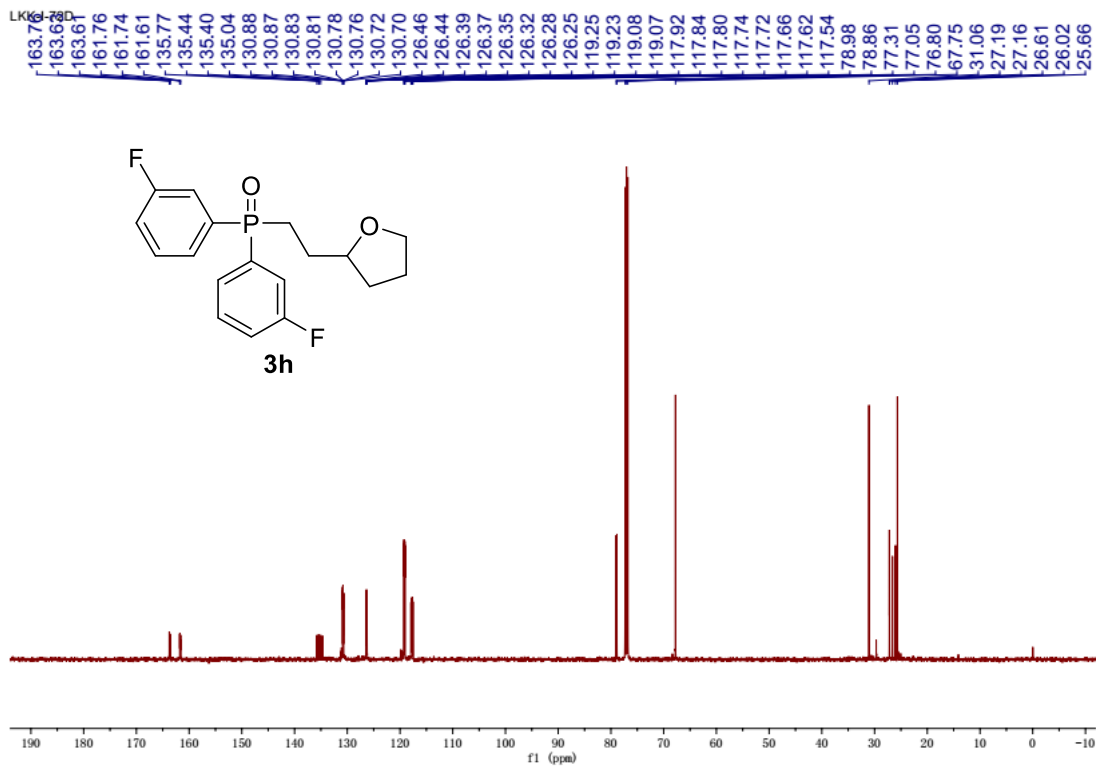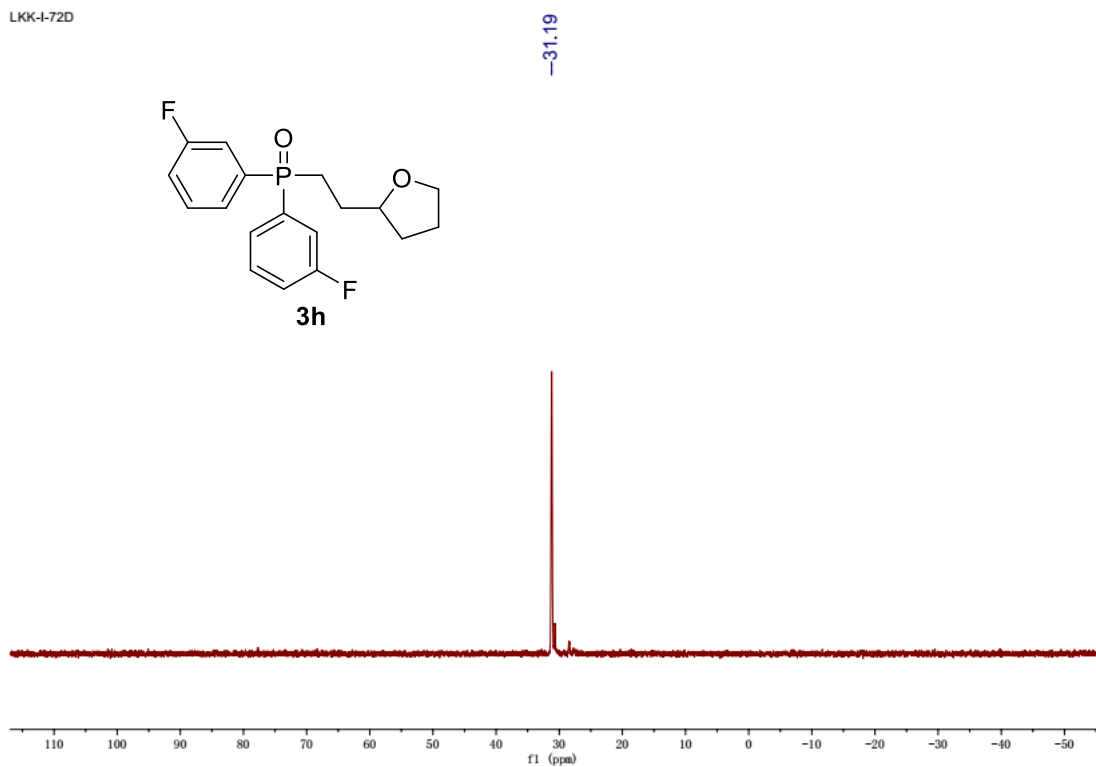

LKK-4-72D

110.56  
110.57

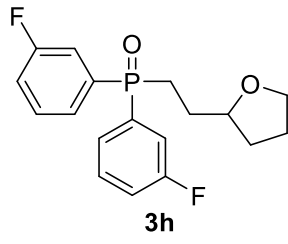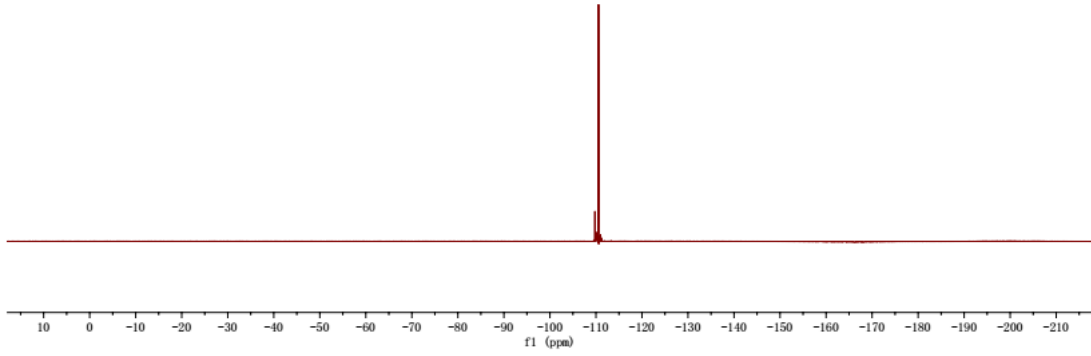

LKK-4-72A

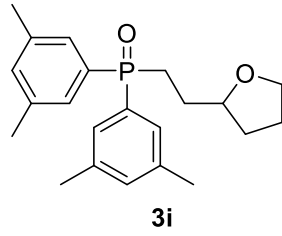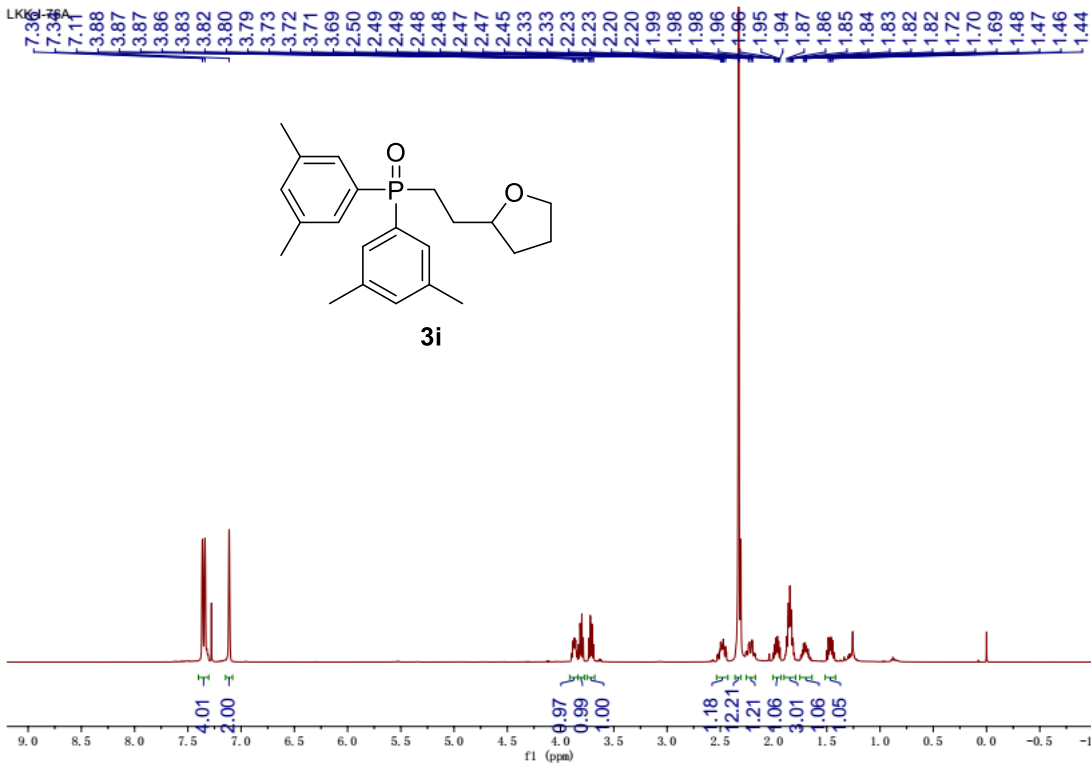

LKK-I-76A

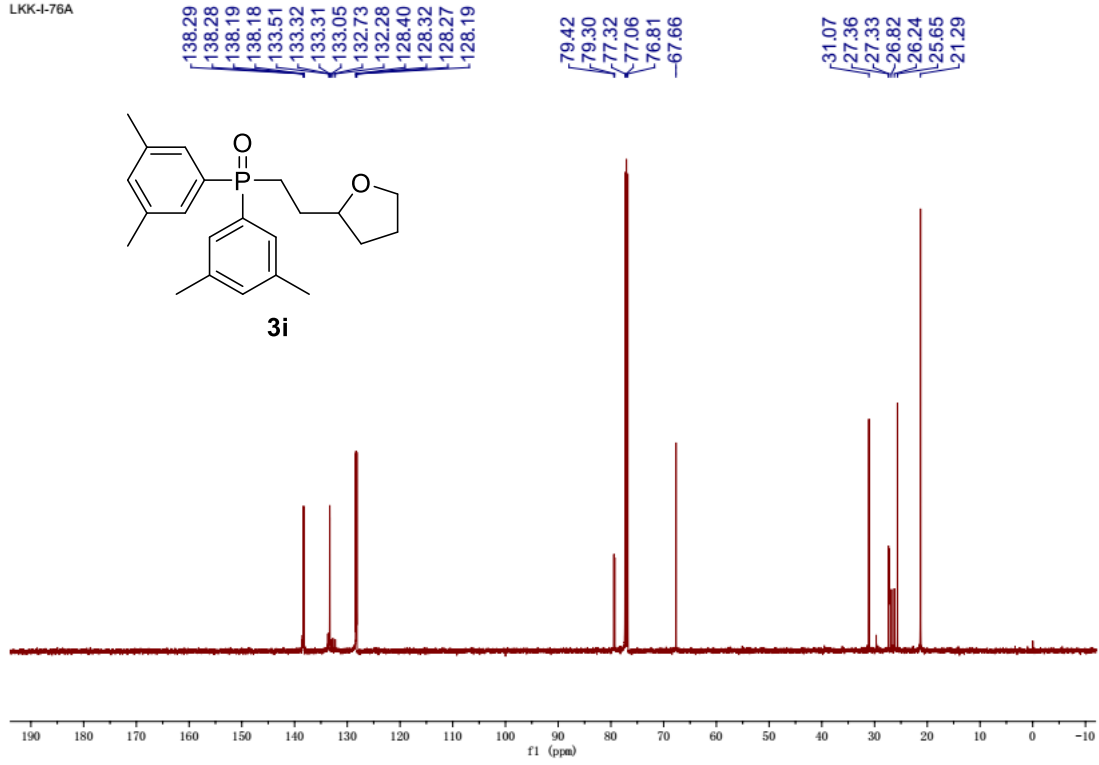

LKK-I-76A

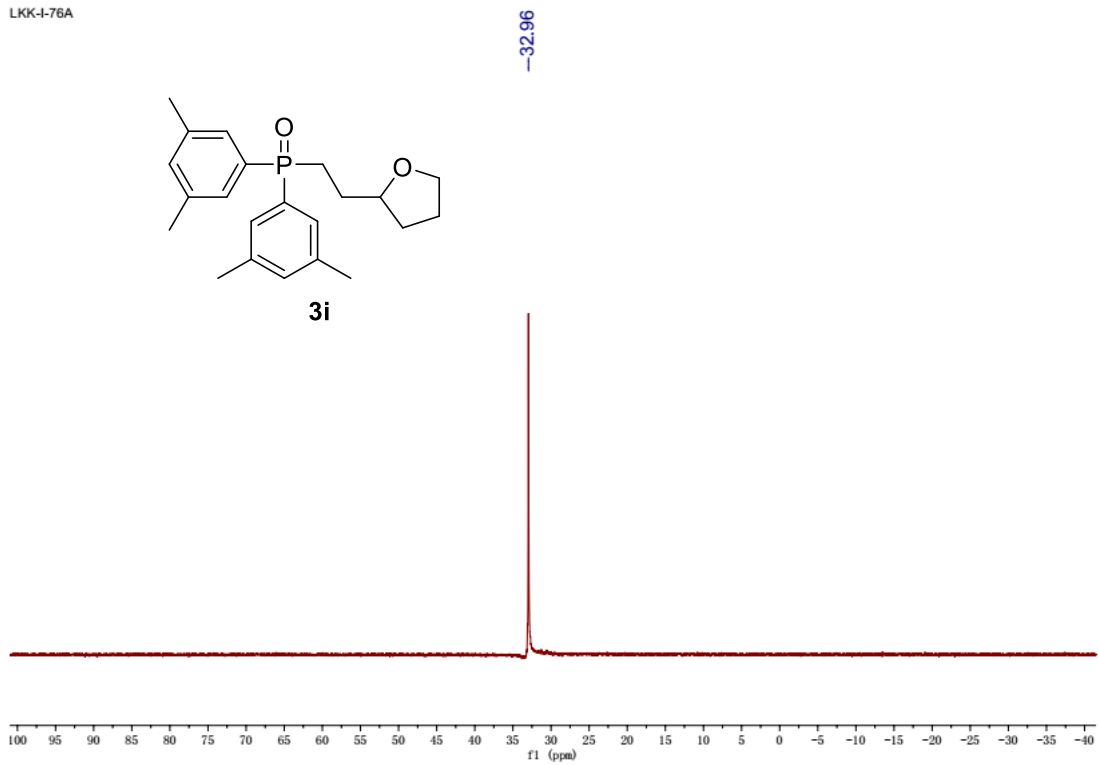



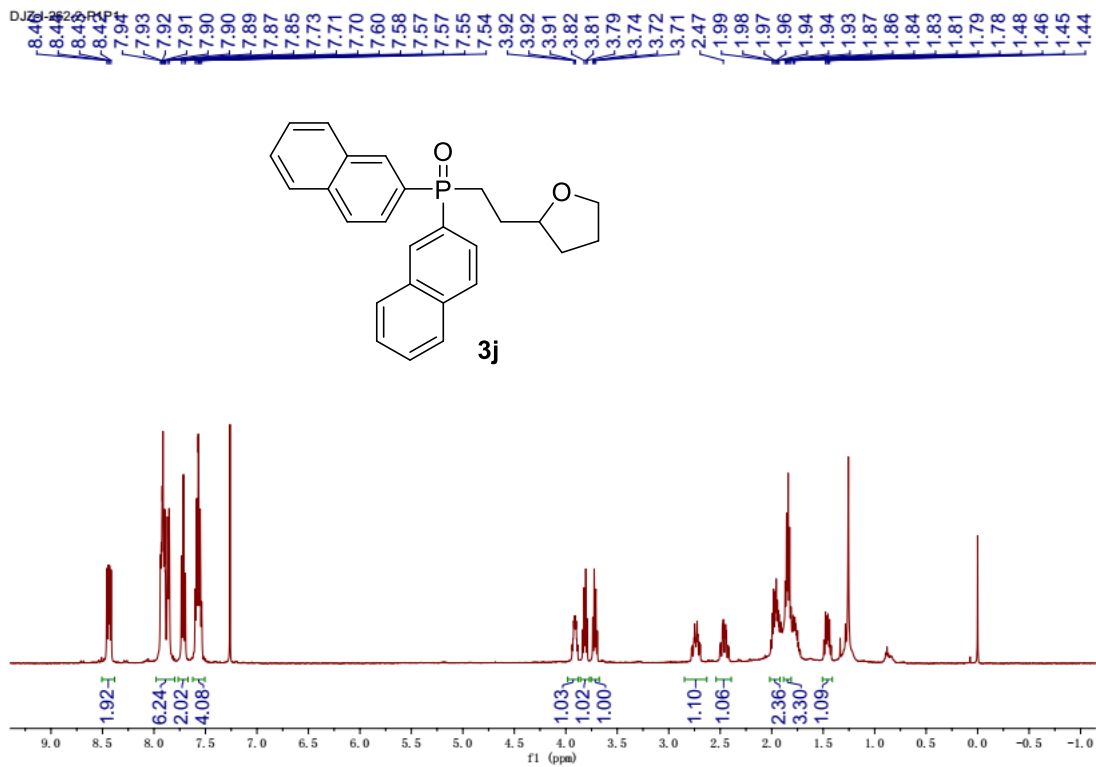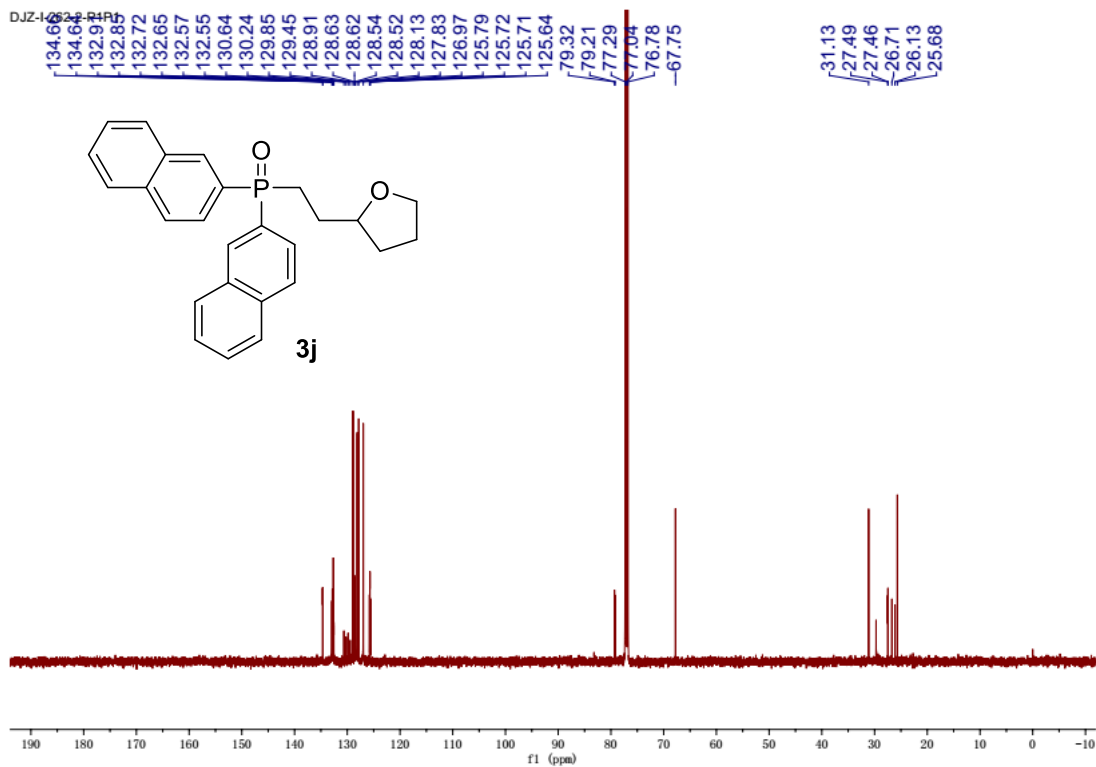

DJZ-1-262-2-P1P1

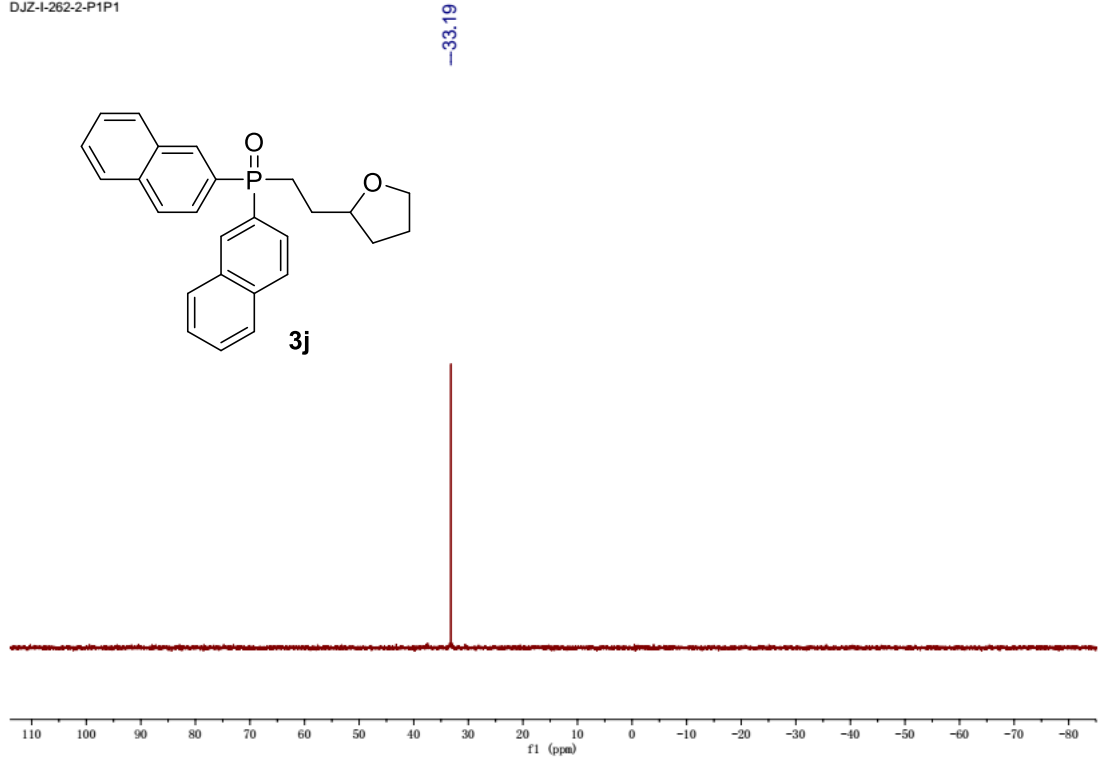

双峰分叠

| Chemical Shift (ppm) |
|----------------------|
| 7.77                 |
| 7.77                 |
| 7.77                 |
| 7.62                 |
| 7.61                 |
| 7.60                 |
| 7.21                 |
| 7.20                 |
| 7.19                 |
| 7.19                 |
| 3.90                 |
| 3.89                 |
| 3.88                 |
| 3.87                 |
| 3.85                 |
| 3.83                 |
| 3.81                 |
| 3.79                 |
| 3.74                 |
| 3.72                 |
| 3.71                 |
| 2.54                 |
| 2.51                 |
| 2.50                 |
| 2.34                 |
| 2.33                 |
| 2.30                 |
| 2.00                 |
| 1.98                 |
| 1.97                 |
| 1.95                 |
| 1.94                 |
| 1.93                 |
| 1.91                 |
| 1.90                 |
| 1.88                 |
| 1.86                 |
| 1.84                 |
| 1.83                 |
| 1.82                 |
| 1.81                 |
| 1.80                 |
| 1.78                 |
| 1.50                 |
| 1.48                 |
| 1.47                 |
| 1.45                 |

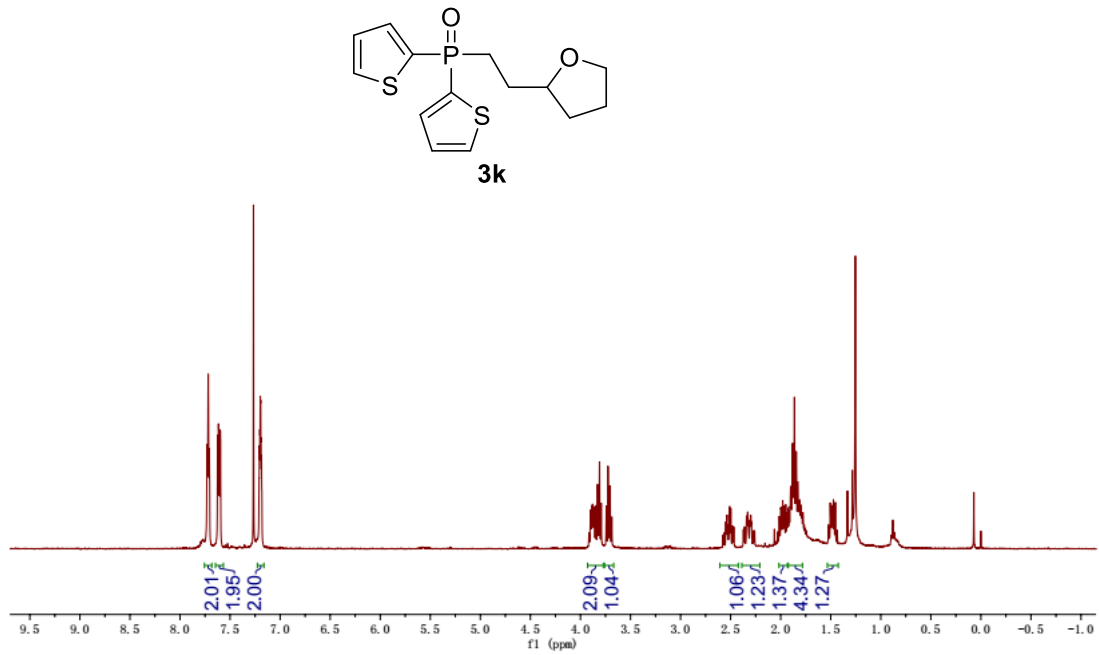

djz-i-201-2-p1ch

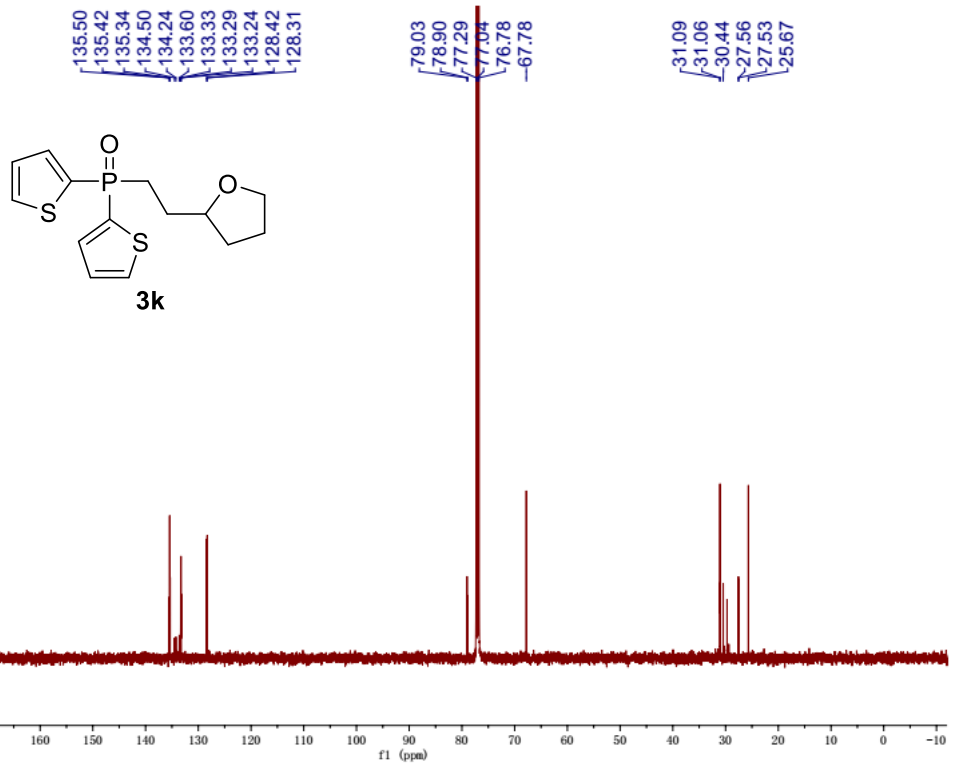

djz-i-201-2-p1ch

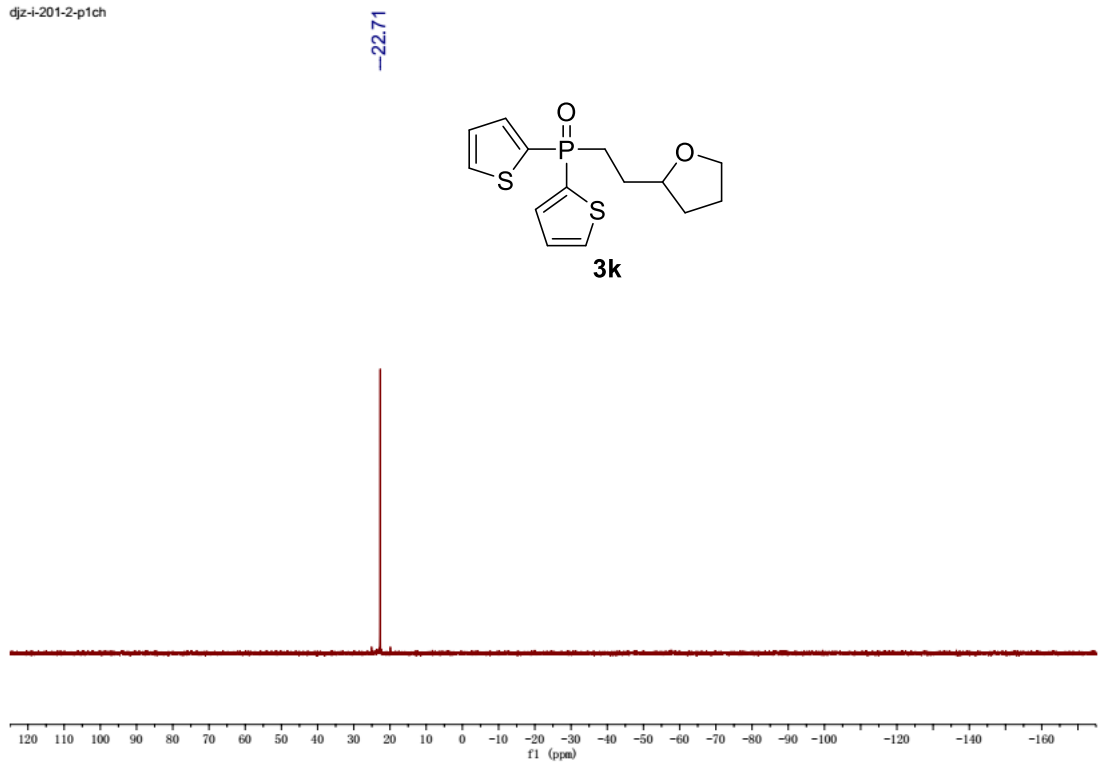

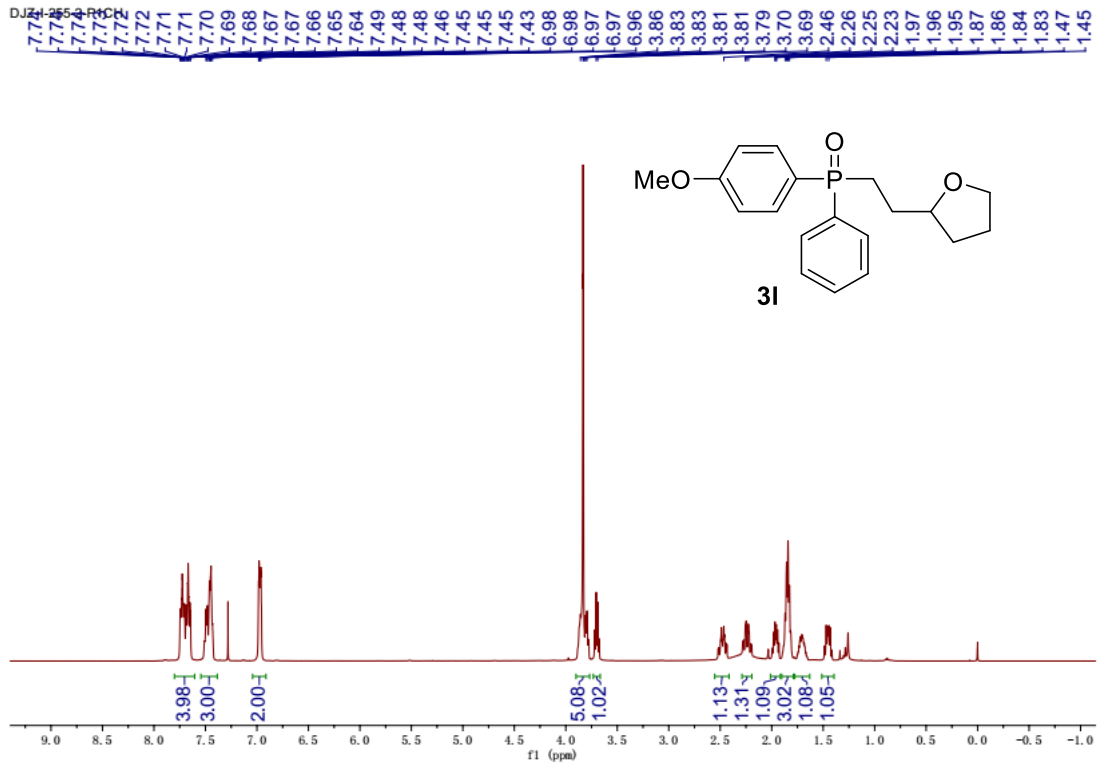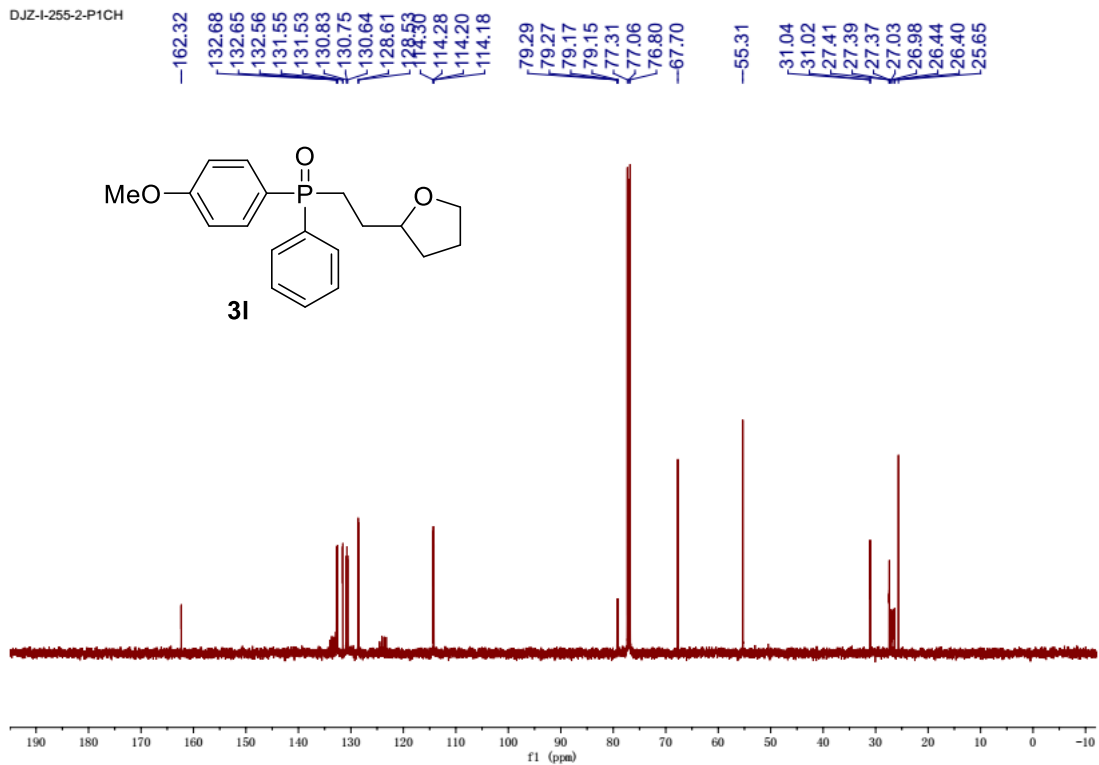

DJZ-1-255-2-P1CH

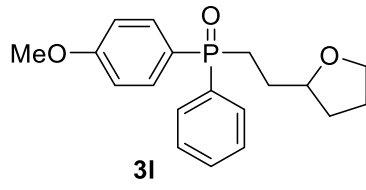

32.97  
32.94

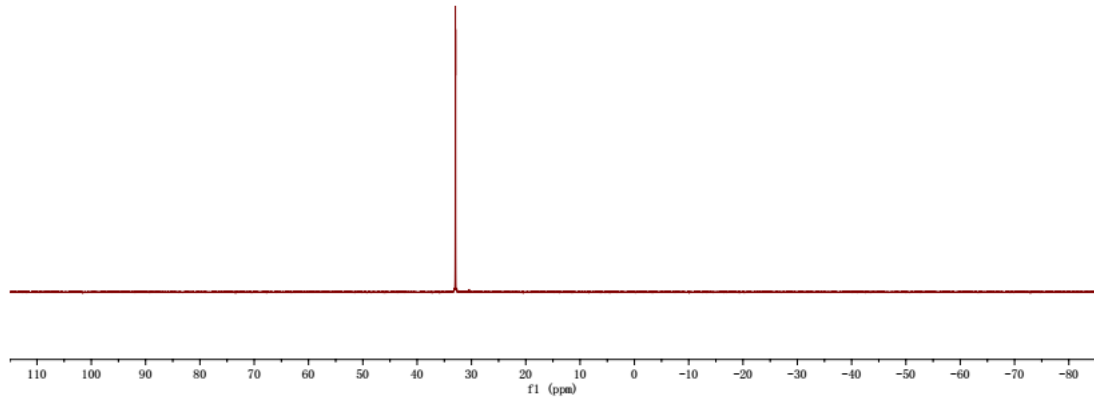

LKK-1-29A  
7.71  
7.70  
7.75  
7.75  
7.74  
7.74  
7.74  
7.73  
7.73  
7.72  
7.71  
7.53  
7.52  
7.51  
7.49  
7.49  
7.48  
7.48  
7.47  
7.47  
7.46  
7.18  
7.18  
7.17  
7.17  
7.16  
7.16  
7.15  
7.15  
7.14  
7.14  
3.81  
3.80  
3.78  
3.71  
3.69  
2.50  
1.98  
1.97  
1.88  
1.86  
1.85  
1.84  
1.45  
1.43

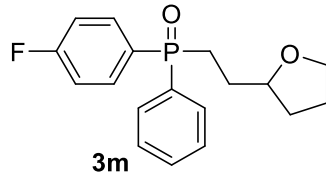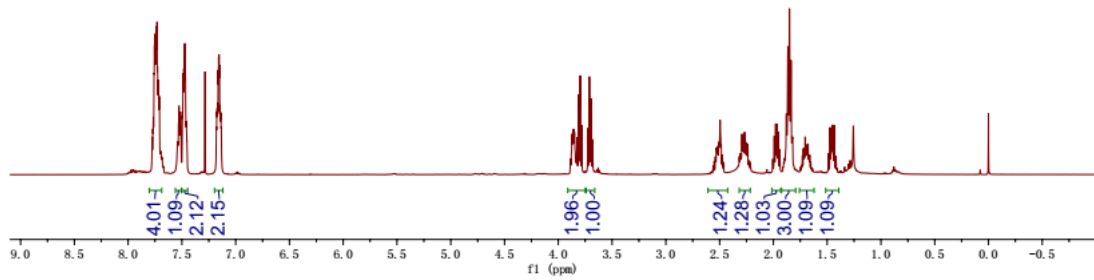

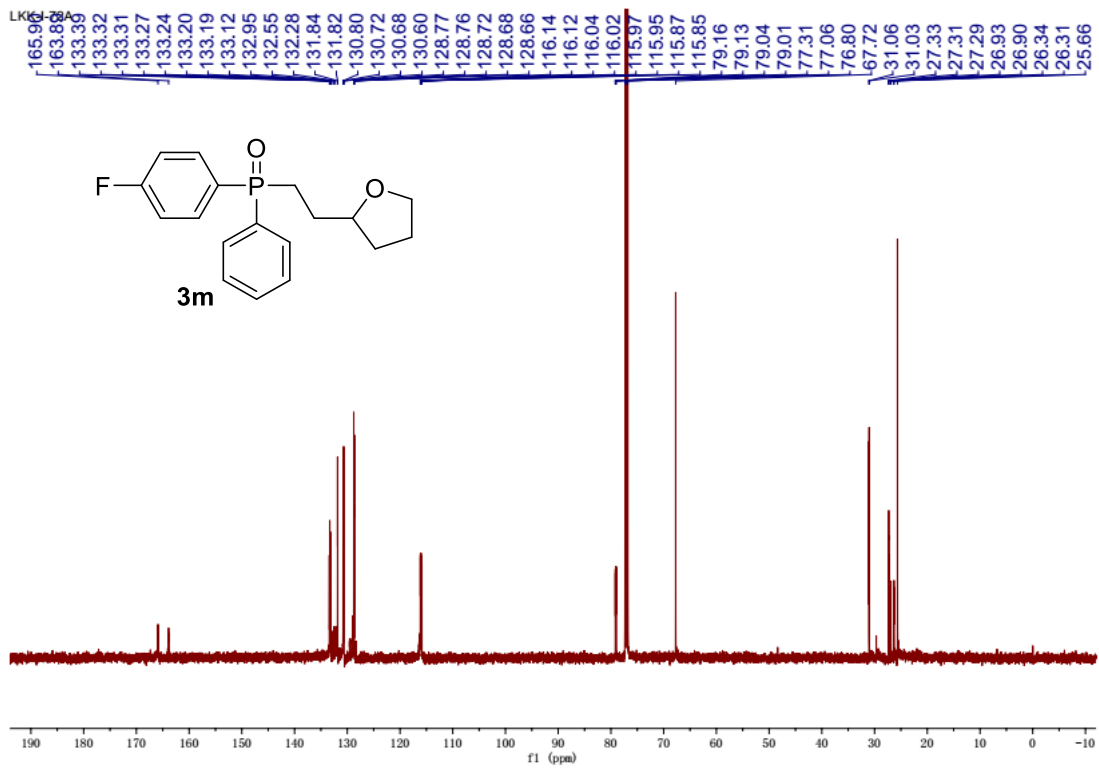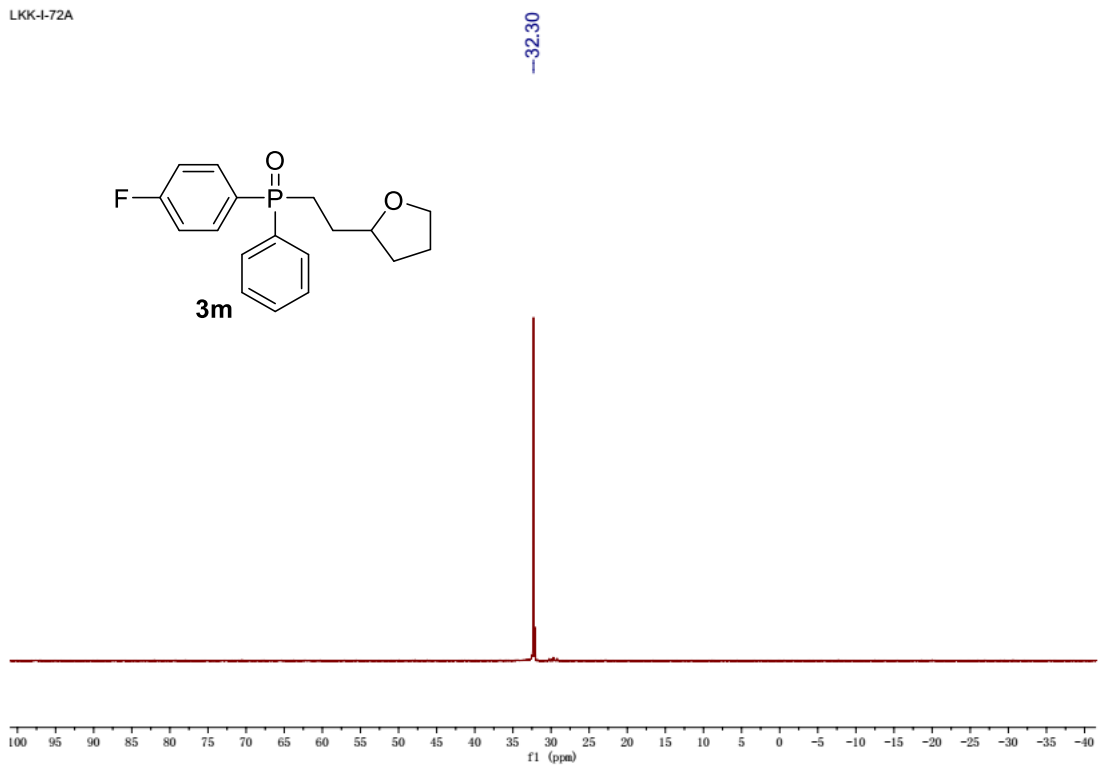

LKK-I-72A

107.07  
107.09

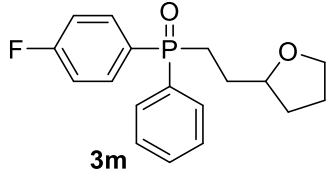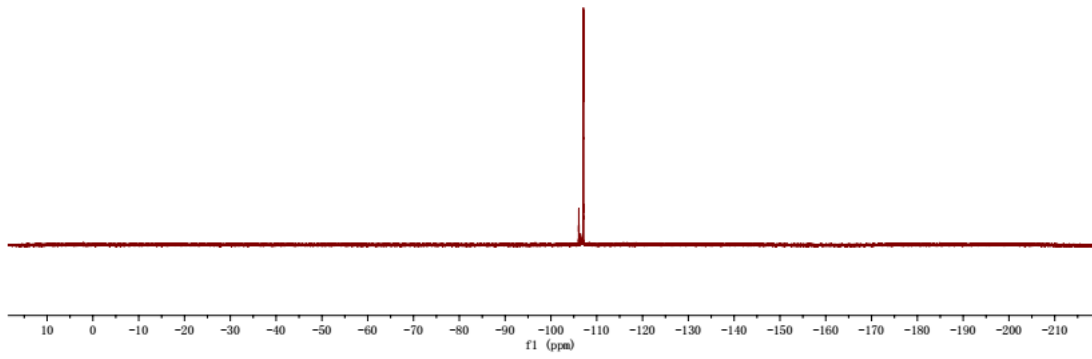

LKK-I-72B  
7.77  
7.77  
7.77  
7.74  
7.73  
7.73  
7.73  
7.72  
7.72  
7.71  
7.71  
7.71  
7.70  
7.70  
7.69  
7.68  
7.68  
7.67  
7.66  
7.52  
7.51  
7.51  
7.49  
7.49  
7.48  
7.48  
7.47  
7.47  
7.46  
7.46  
7.45  
7.45  
7.45  
7.44  
7.44  
7.43  
7.43  
3.81  
3.81  
3.79  
3.79  
3.71  
3.69  
3.69  
1.88  
1.87  
1.86  
1.85  
1.83

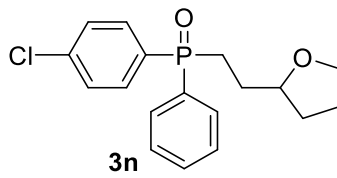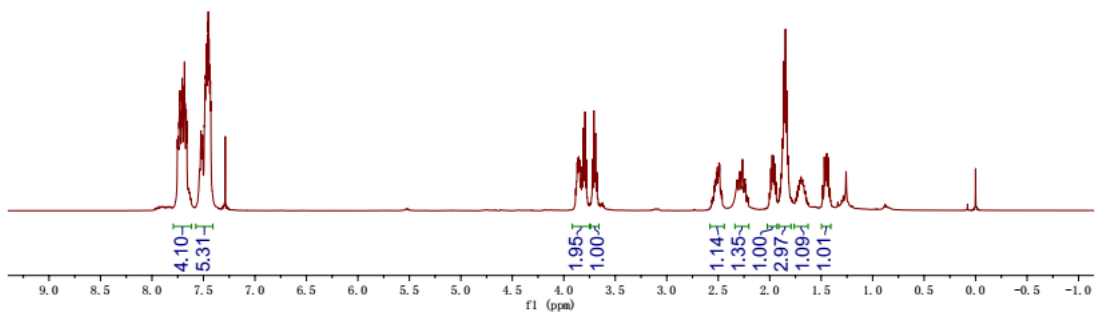

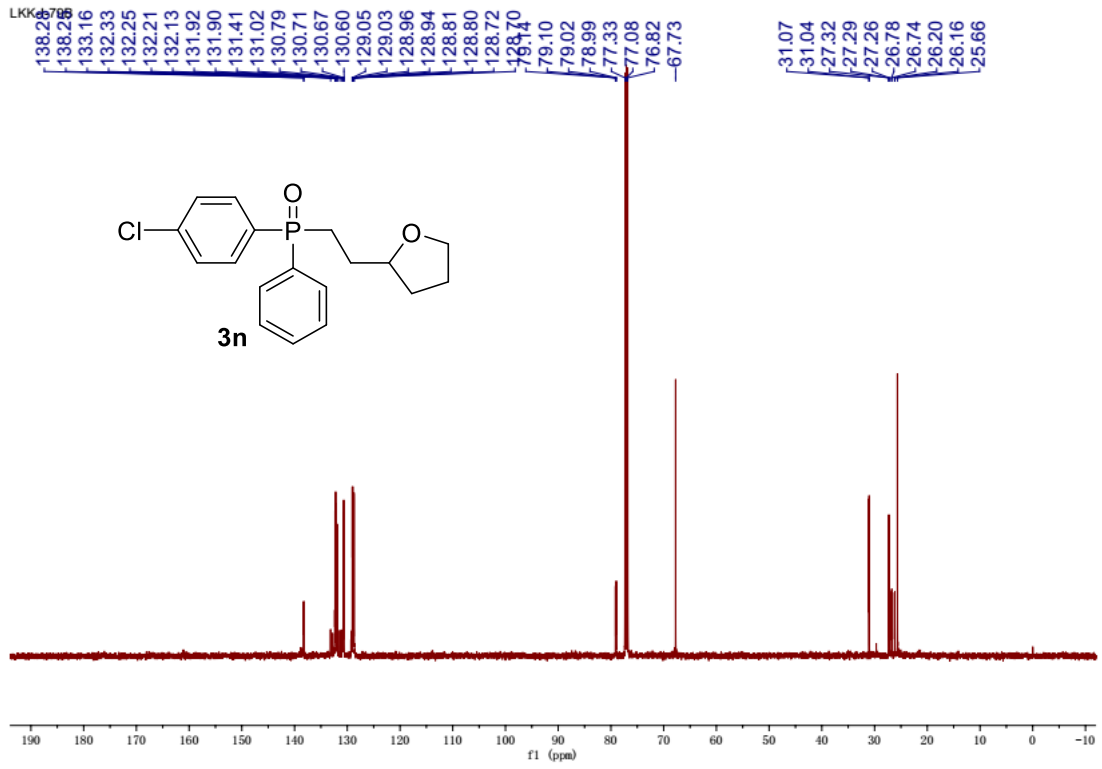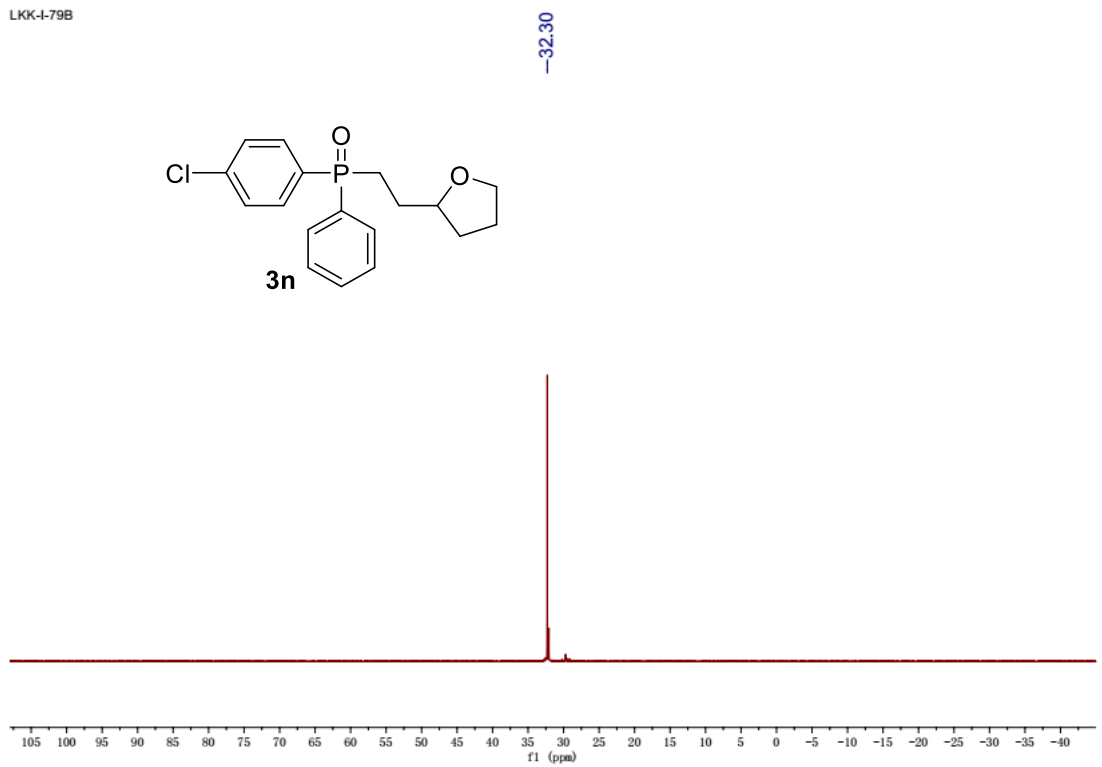



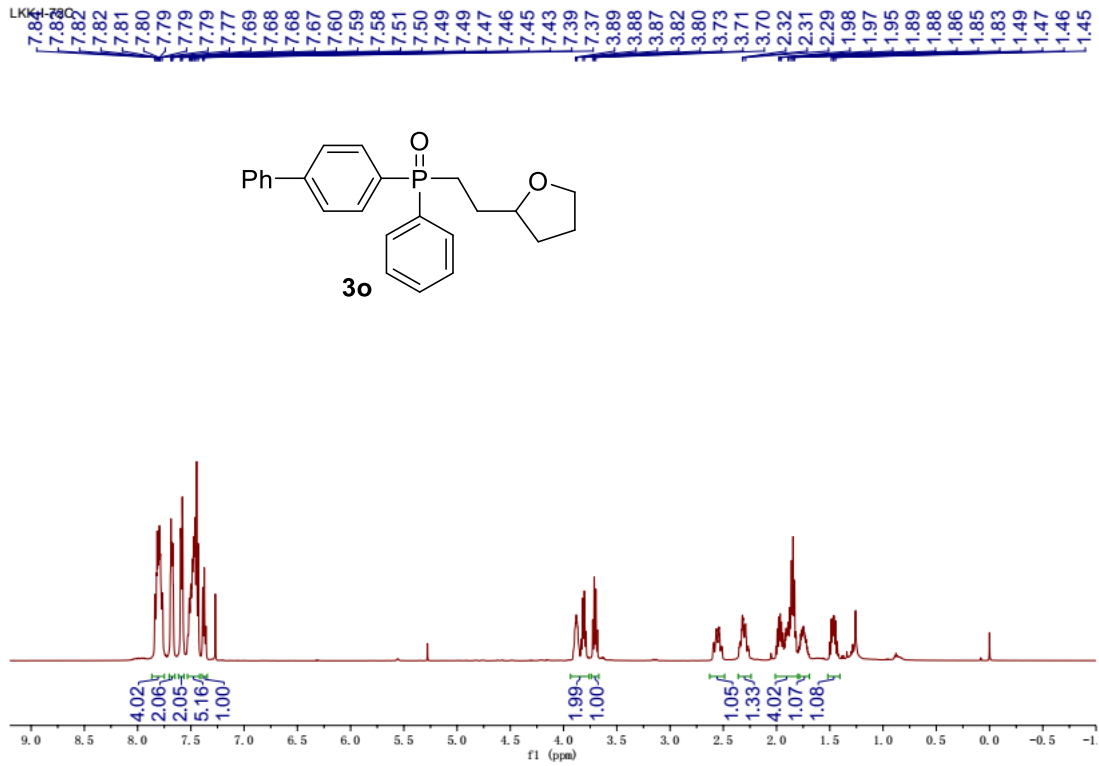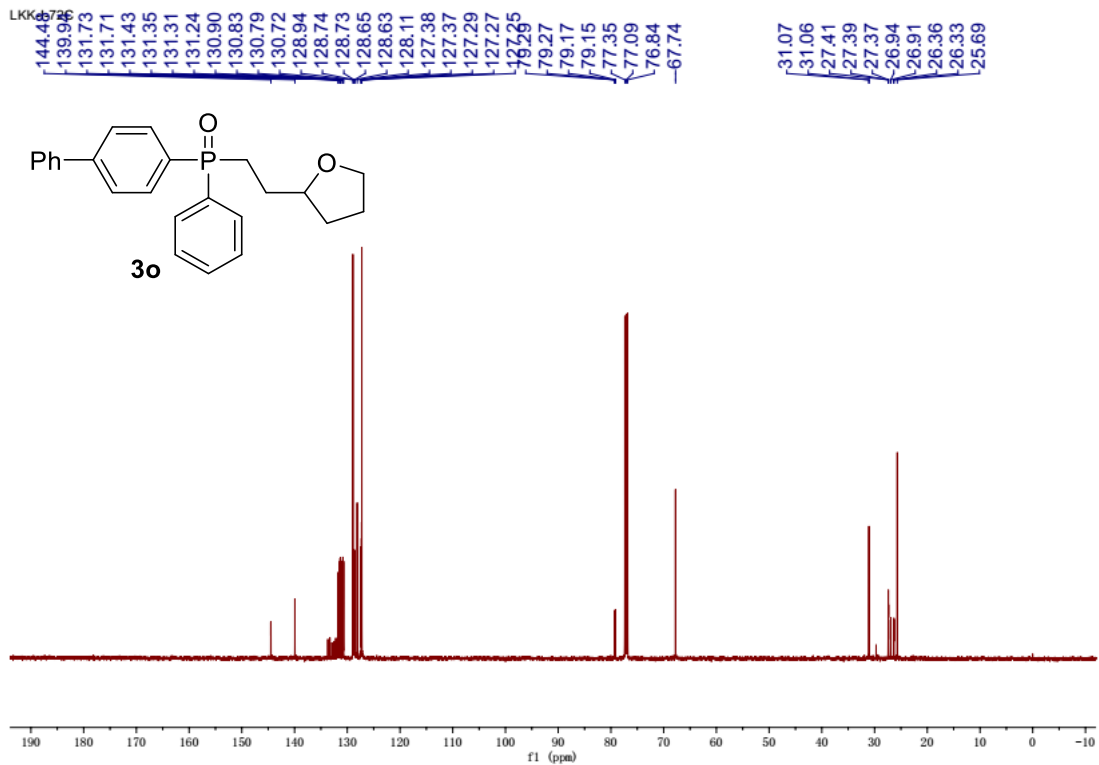

LKK-I-72C

-32.72

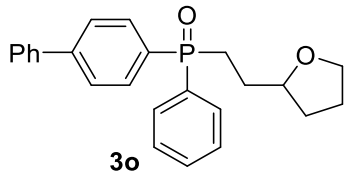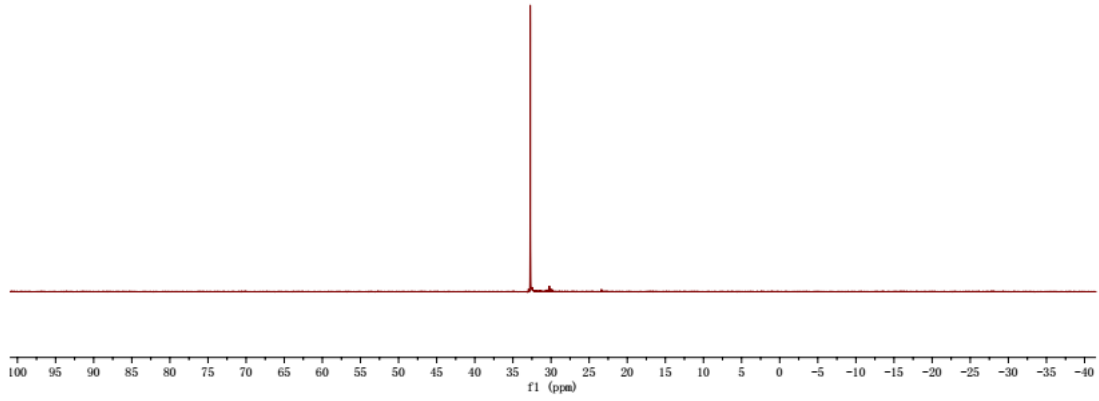

LKK-I-72A  
8.43  
8.41  
8.40  
8.39  
7.93  
7.91  
7.89  
7.86  
7.85  
7.81  
7.80  
7.79  
7.77  
7.77  
7.68  
7.67  
7.65  
7.59  
7.58  
7.56  
7.55  
7.53  
7.51  
7.49  
7.47  
7.46  
7.46  
3.89  
3.88  
3.82  
3.80  
3.79  
3.72  
3.71  
3.69  
2.38  
1.98  
1.97  
1.96  
1.95  
1.93  
1.87  
1.86  
1.84  
1.83  
1.81  
1.46  
1.45  
1.44

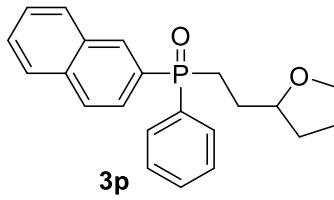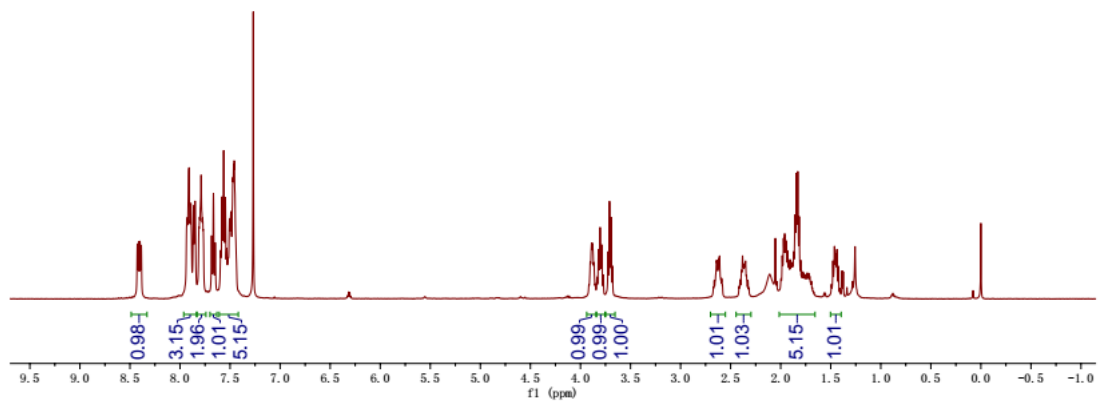

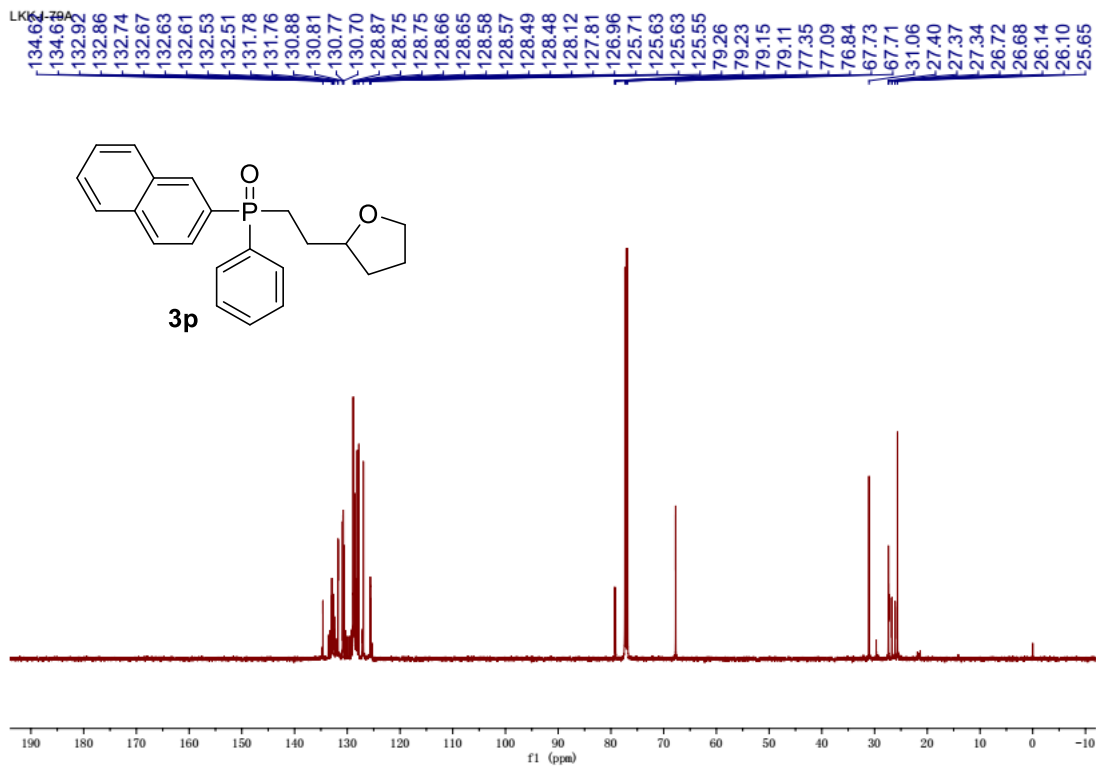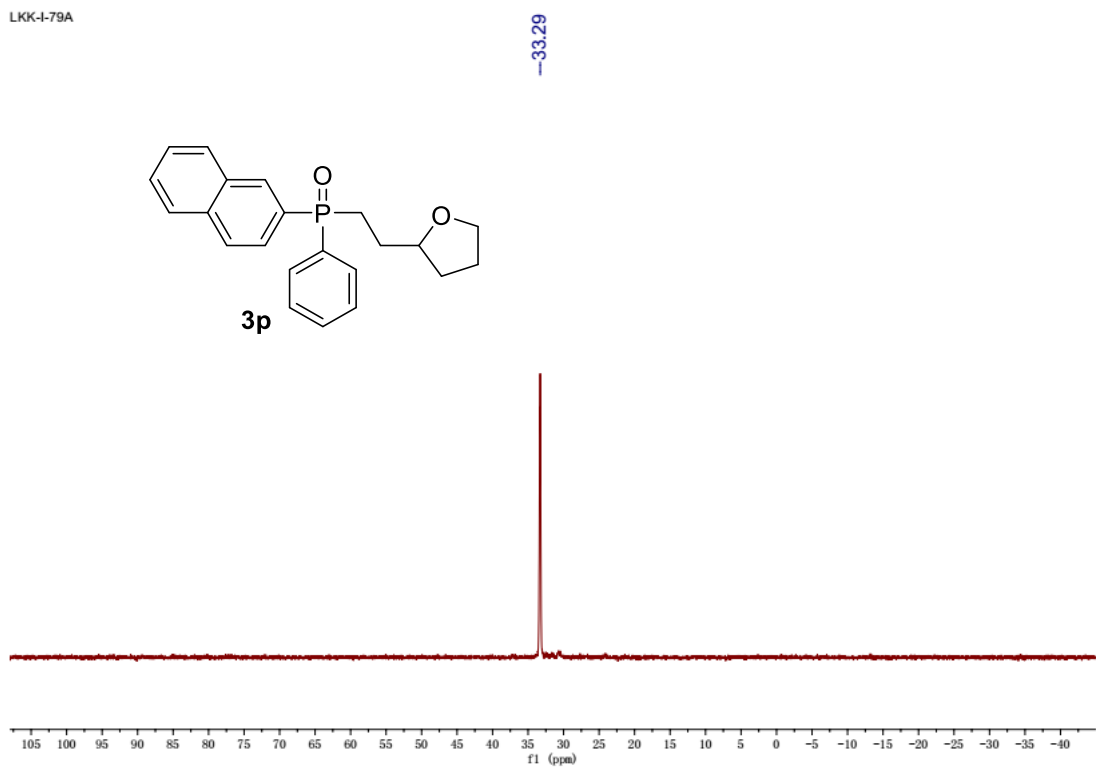

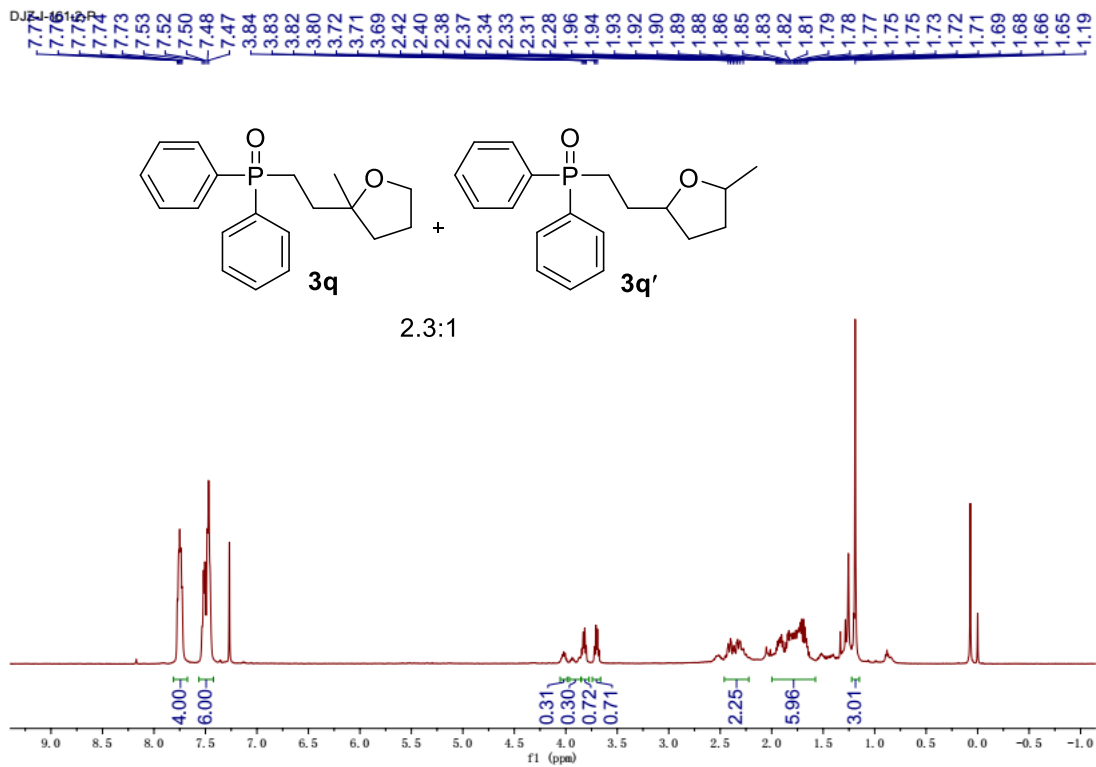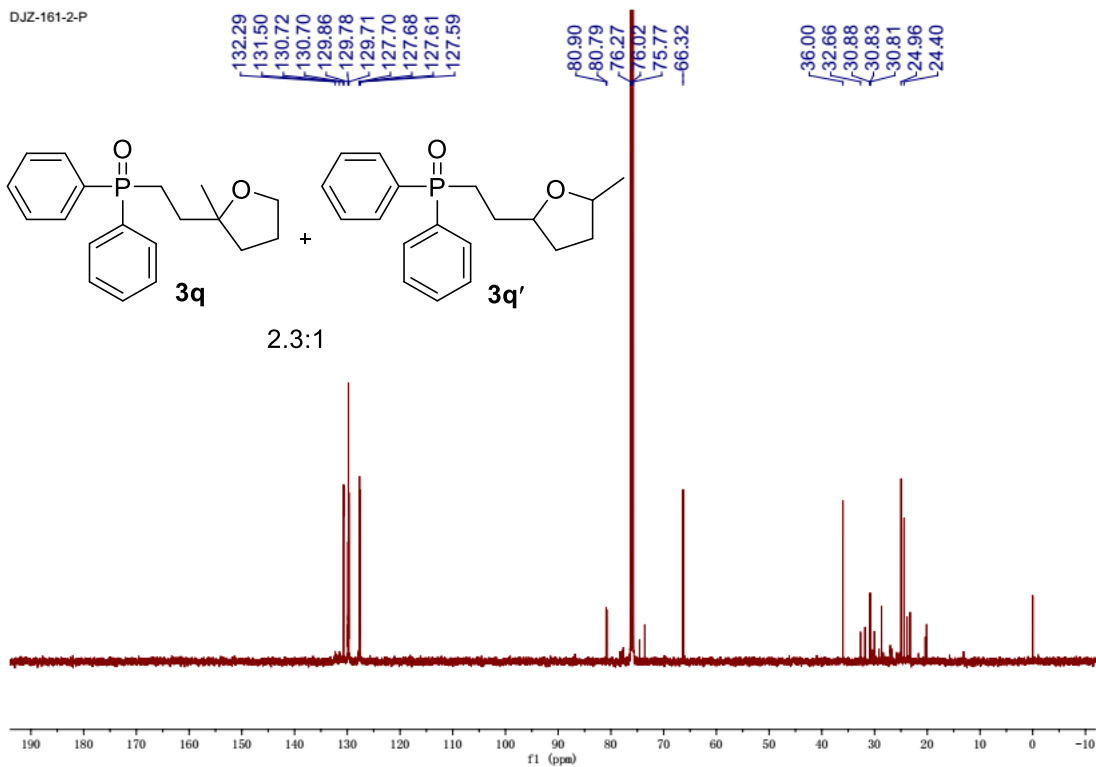

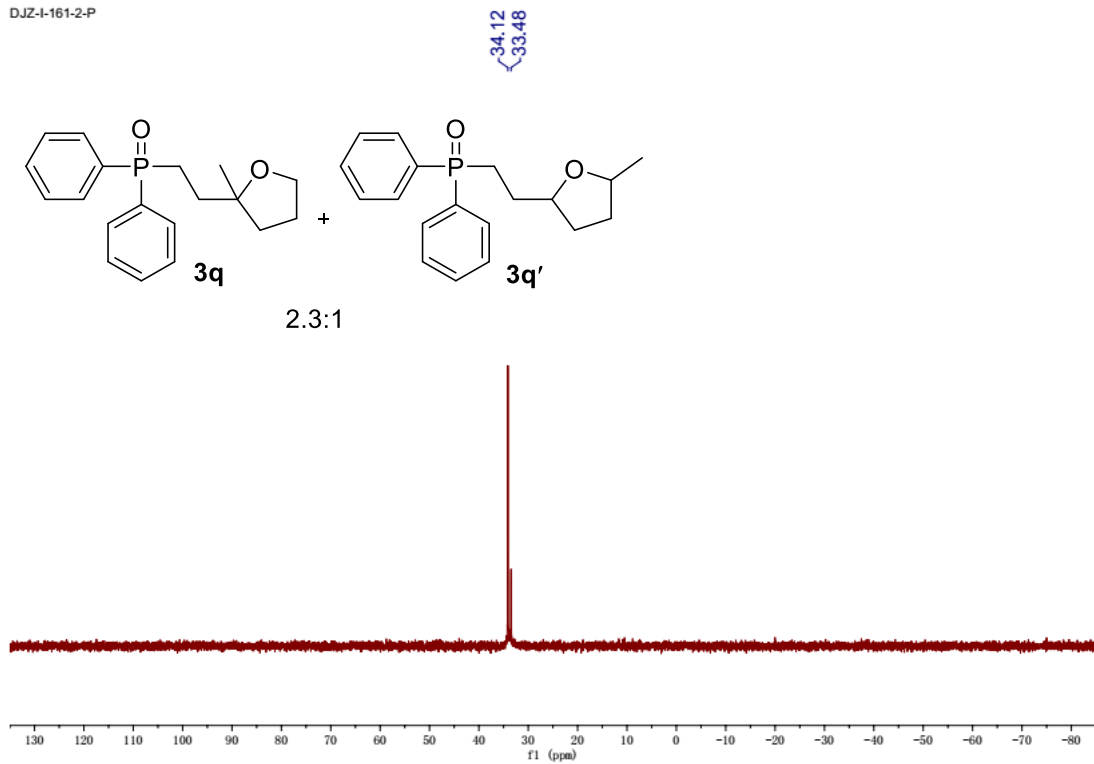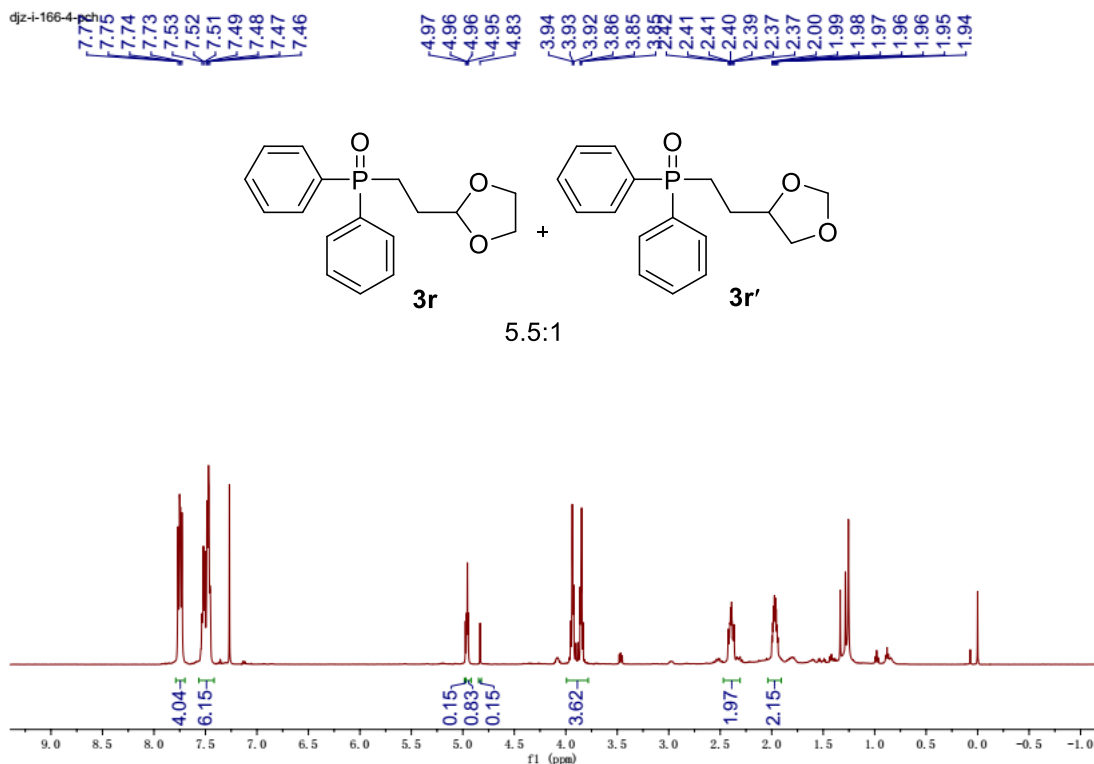

djz-i-166-4-pch

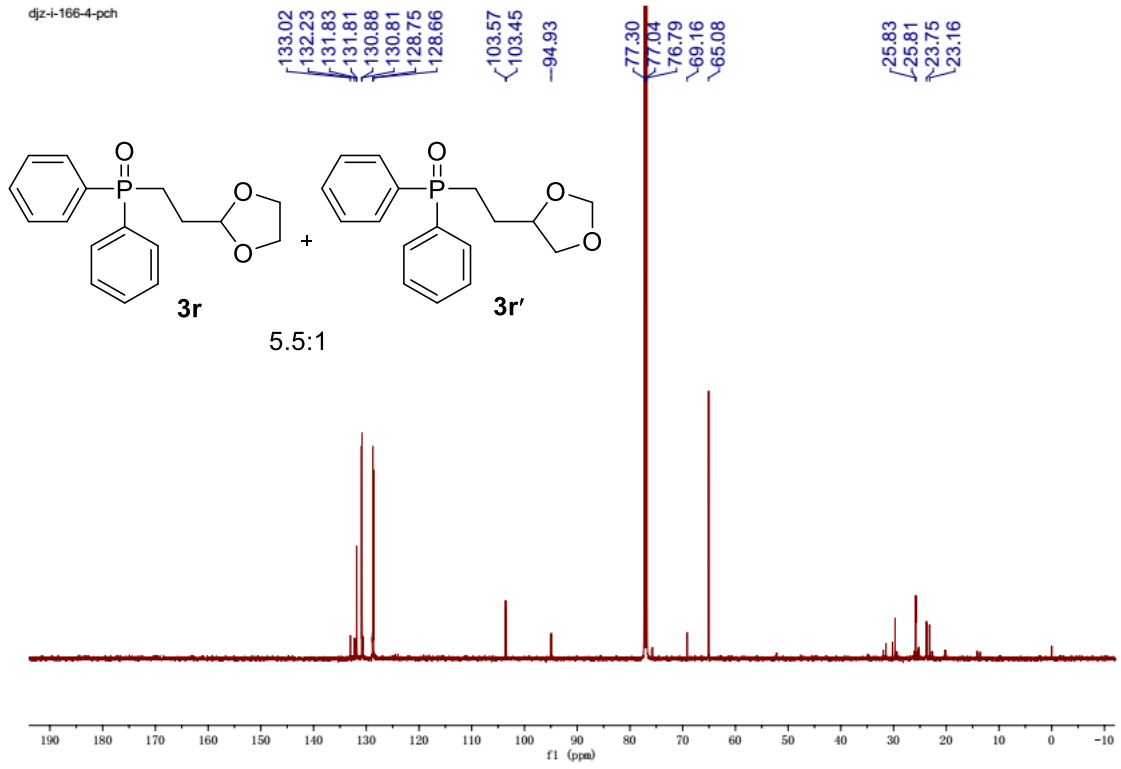

djz-i-166-4-pch

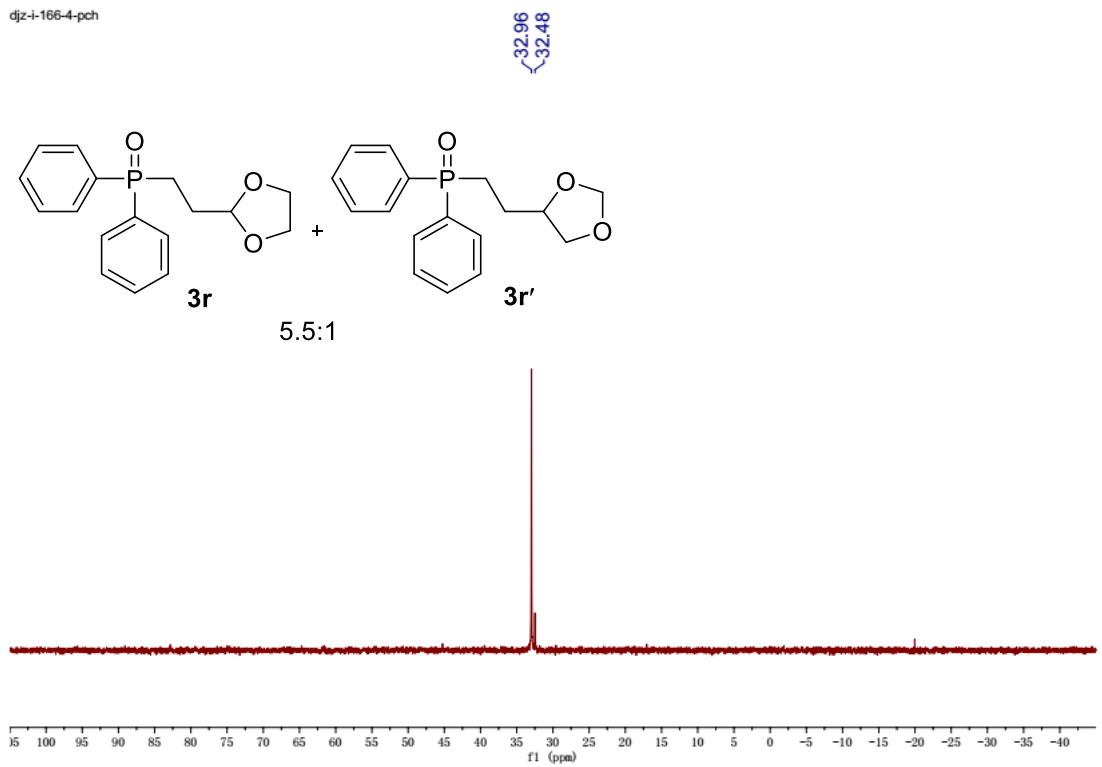

djz-i-211-2-p2

7.76  
7.74  
7.72  
7.53  
7.51  
7.49  
7.47

3.75  
3.72  
3.68  
3.65  
3.62  
3.60  
3.57  
3.55  
3.53  
3.51  
3.24  
3.22  
3.20  
2.56  
2.54  
2.29  
1.77  
1.63  
1.61  
1.59

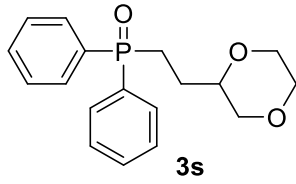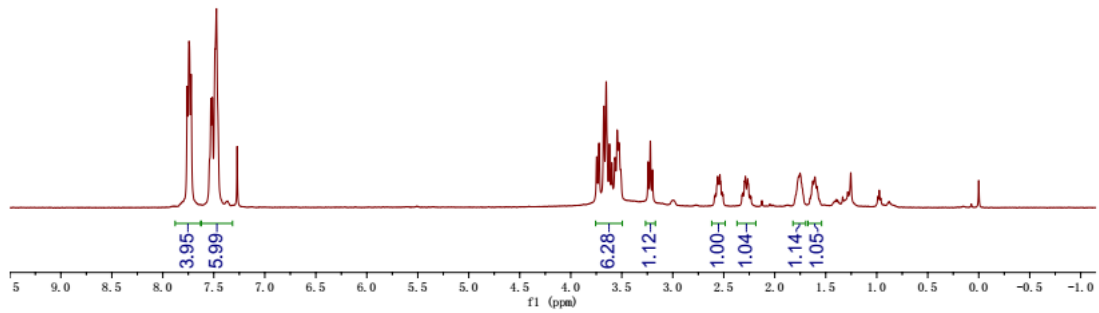

djz-i-211-2-p2

133.17  
132.63  
132.38  
131.91  
131.89  
131.84  
130.87  
130.80  
130.75  
130.67  
128.82  
128.78  
128.73  
128.69

77.31  
77.06  
76.80  
75.17  
75.06  
70.87  
66.73  
66.40  
25.57  
24.99  
23.43  
23.40

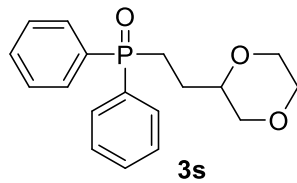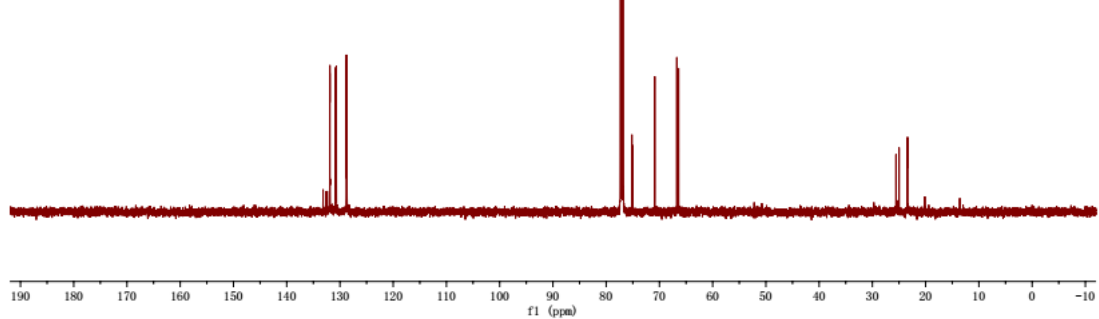

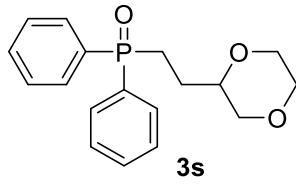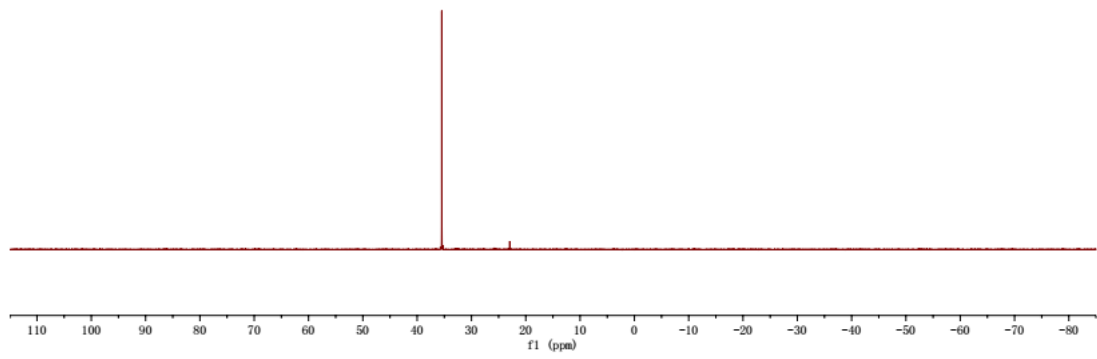

7.66  
7.58  
7.55  
7.53  
7.43  
7.42  
7.40  
7.27  
7.27  
7.25  
7.24  
7.23  
7.22  
6.81  
6.78  
6.77  
6.76  
6.74  
6.73  
6.72  
6.70  
6.38  
6.38  
6.36  
6.36  
6.36  
6.32  
6.32  
6.32  
6.30  
6.30  
6.28  
-2.39

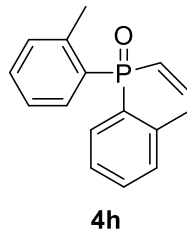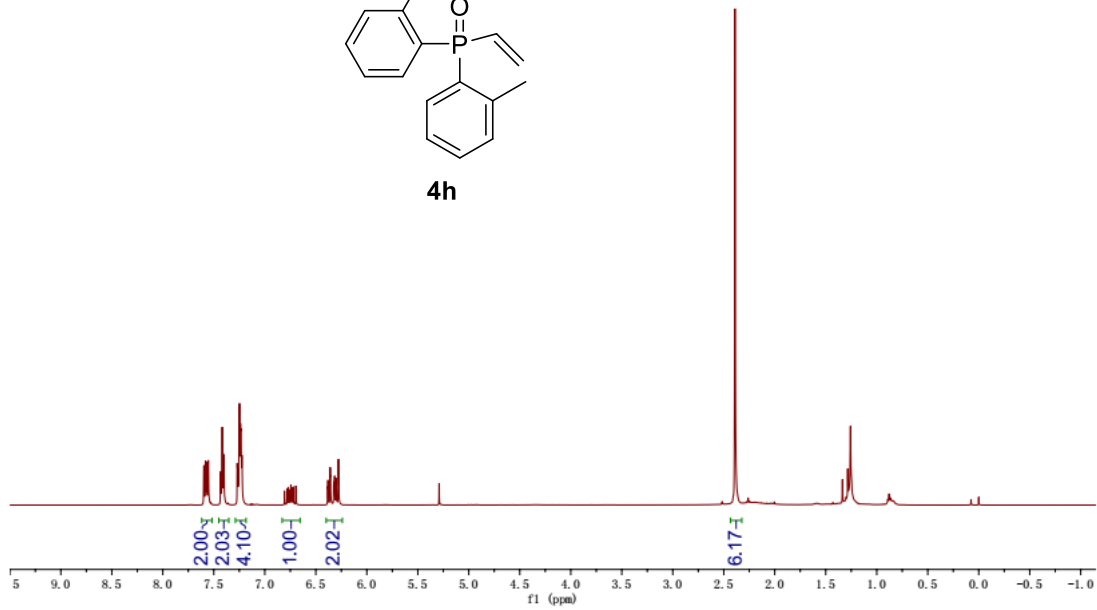



djz-i-259-1-pch

142.09  
142.02  
134.61  
132.43  
132.33  
131.95  
131.94  
131.81  
131.72  
131.56  
131.32  
130.78  
130.50  
125.75  
125.65

77.30  
77.05  
76.80

21.41  
21.38

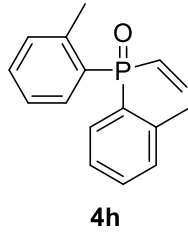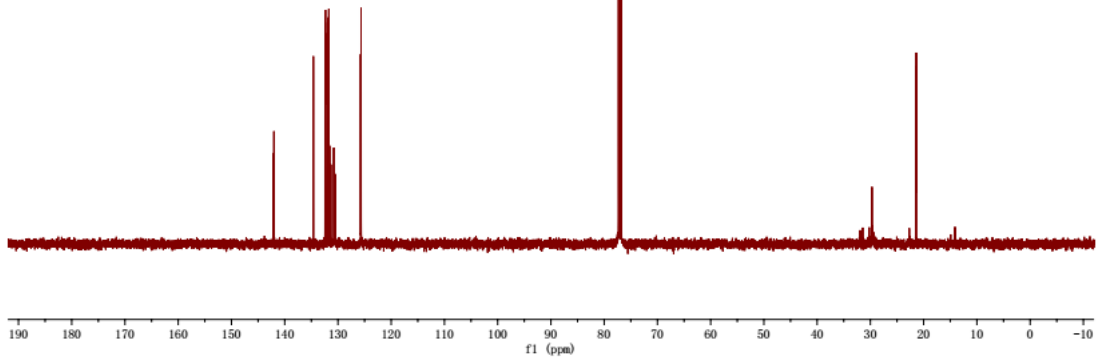

djz-i-259-1-pch

-26.52

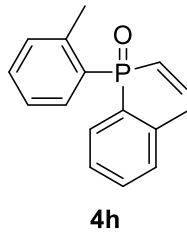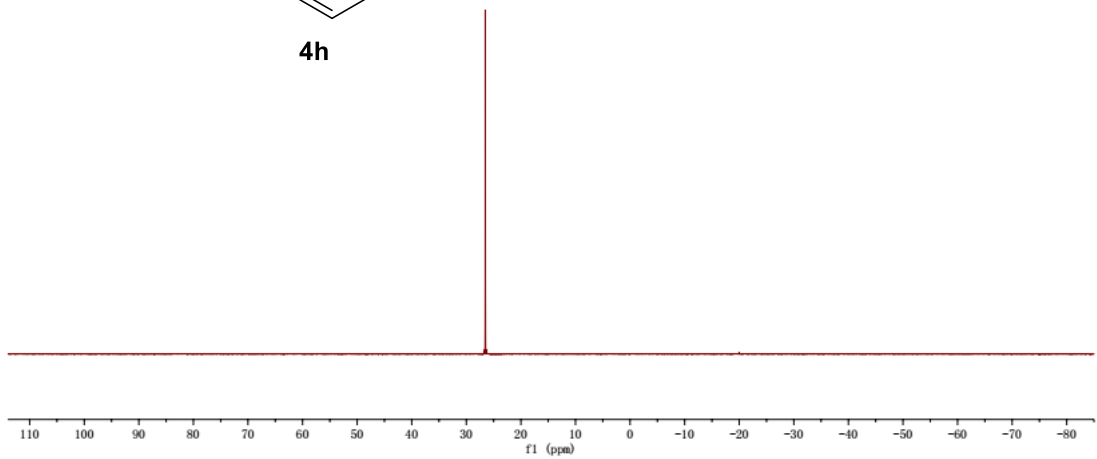

djz-i-224-2

7.32  
7.31  
7.27

2.10  
2.10  
2.09

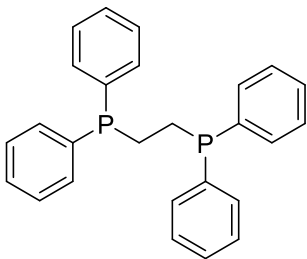

5a (DPPE)

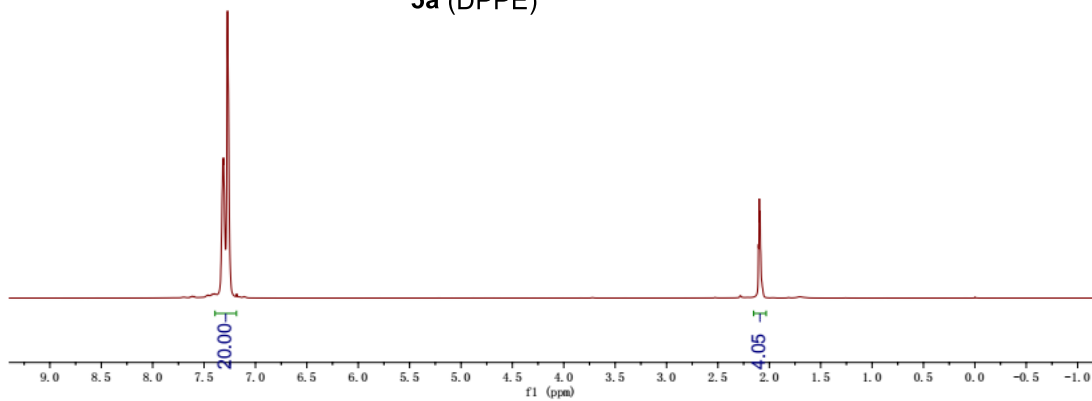

djz-i-224-2

138.24  
138.20  
138.19  
138.14  
132.90  
132.82  
132.75  
128.75  
128.57  
128.54  
128.52

77.42  
77.17  
76.91

23.95  
23.94

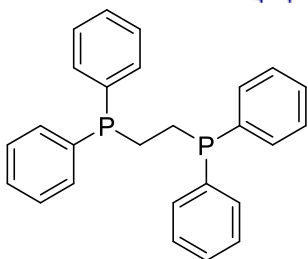

5a (DPPE)

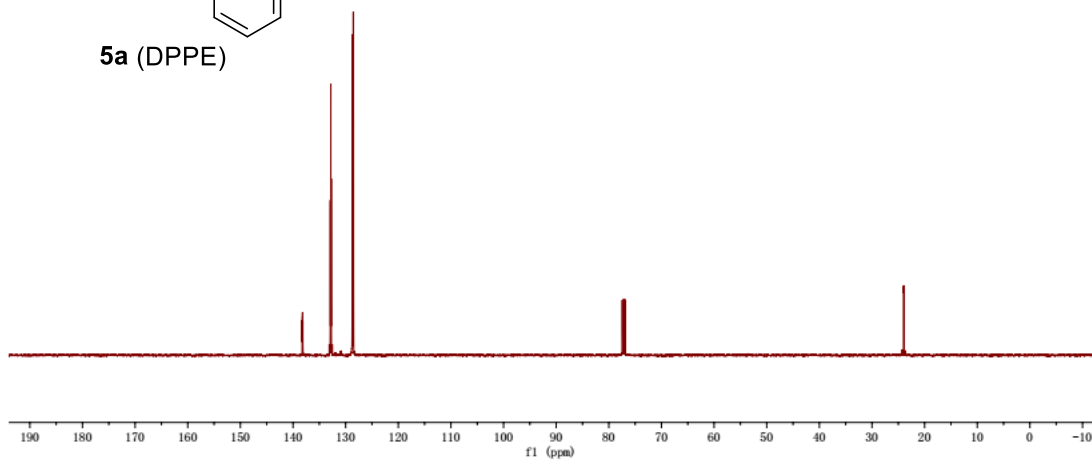

djz-i-224-2

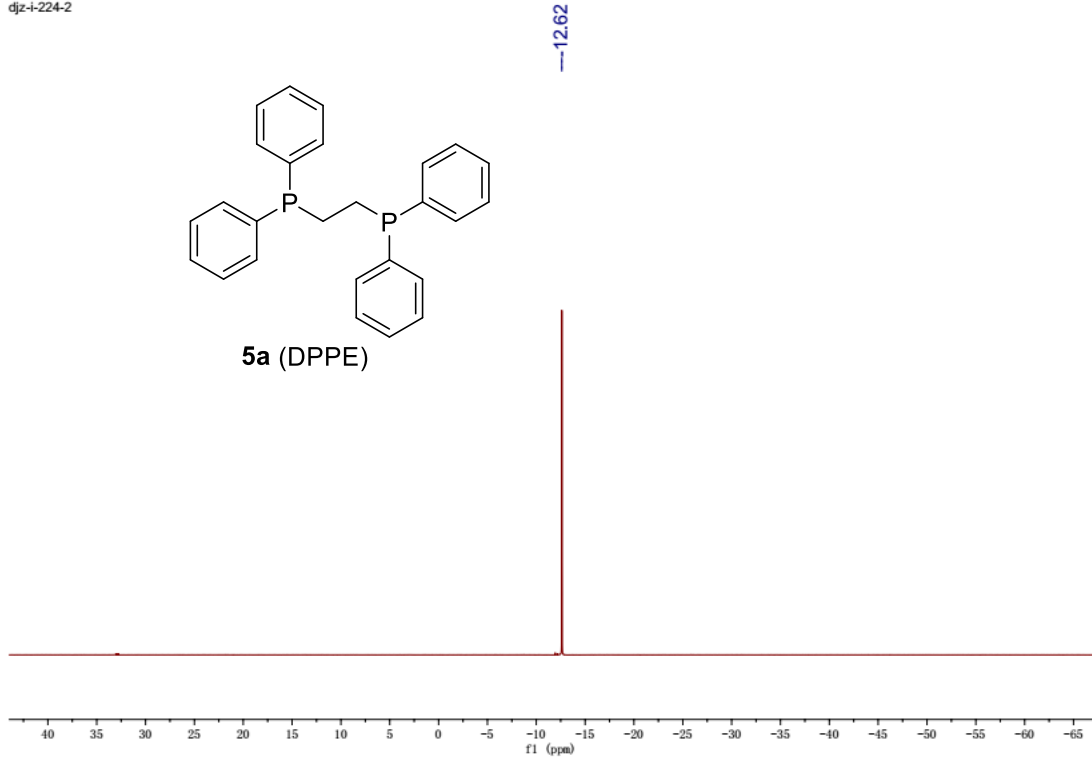

djz-i-169-2-ppp

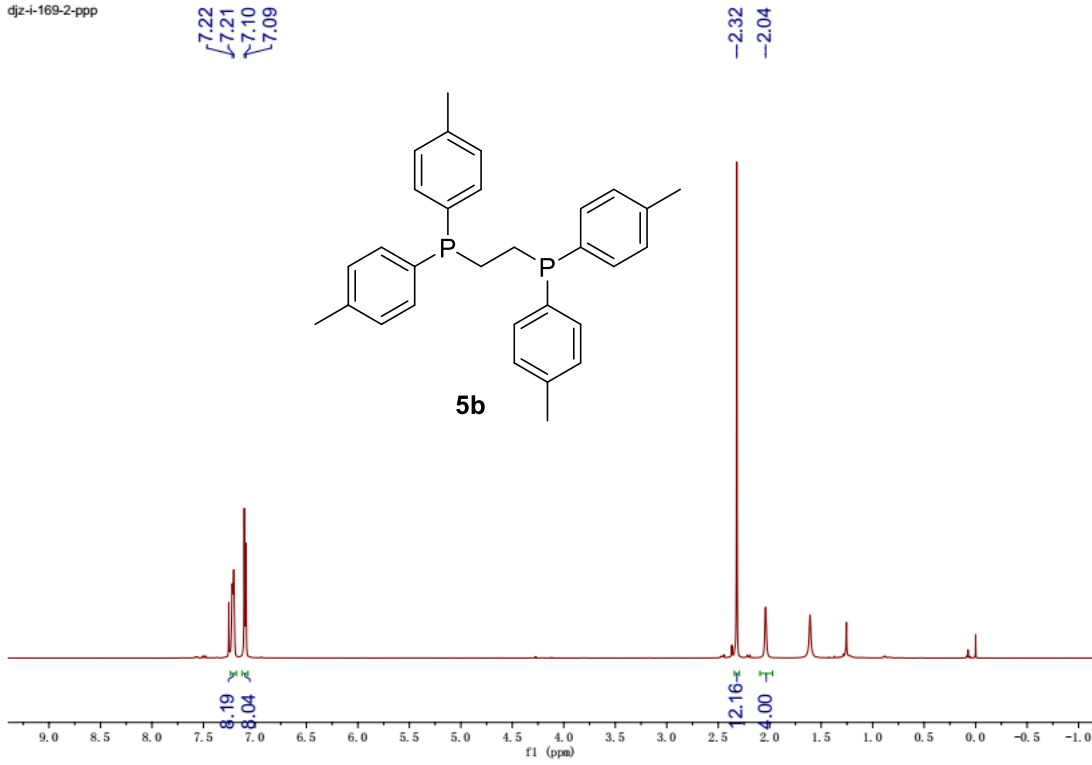

djZ-i-169-2-ppp

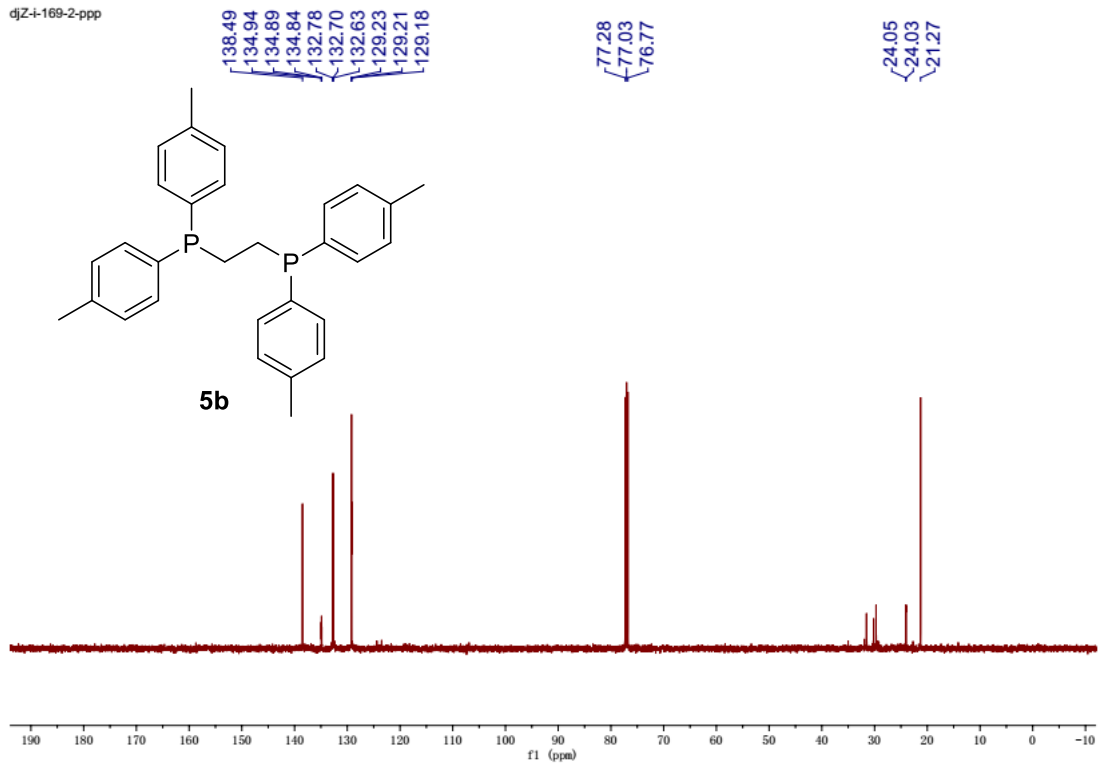

djZ-i-169-2-ppp

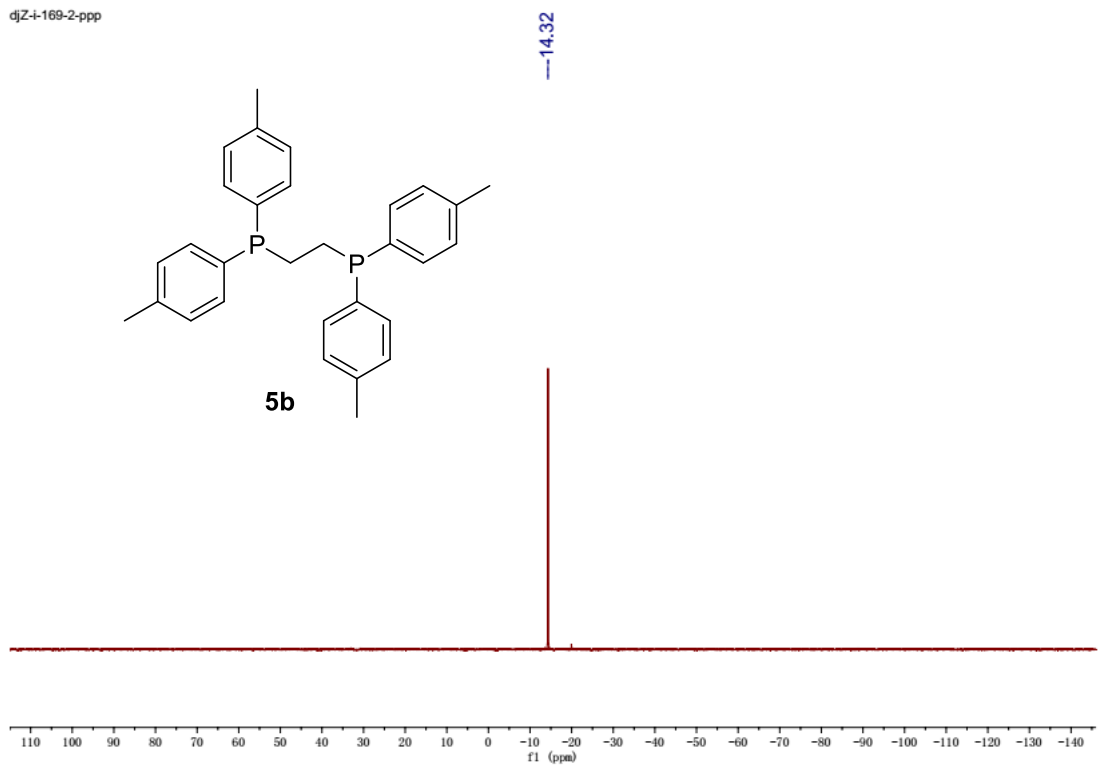

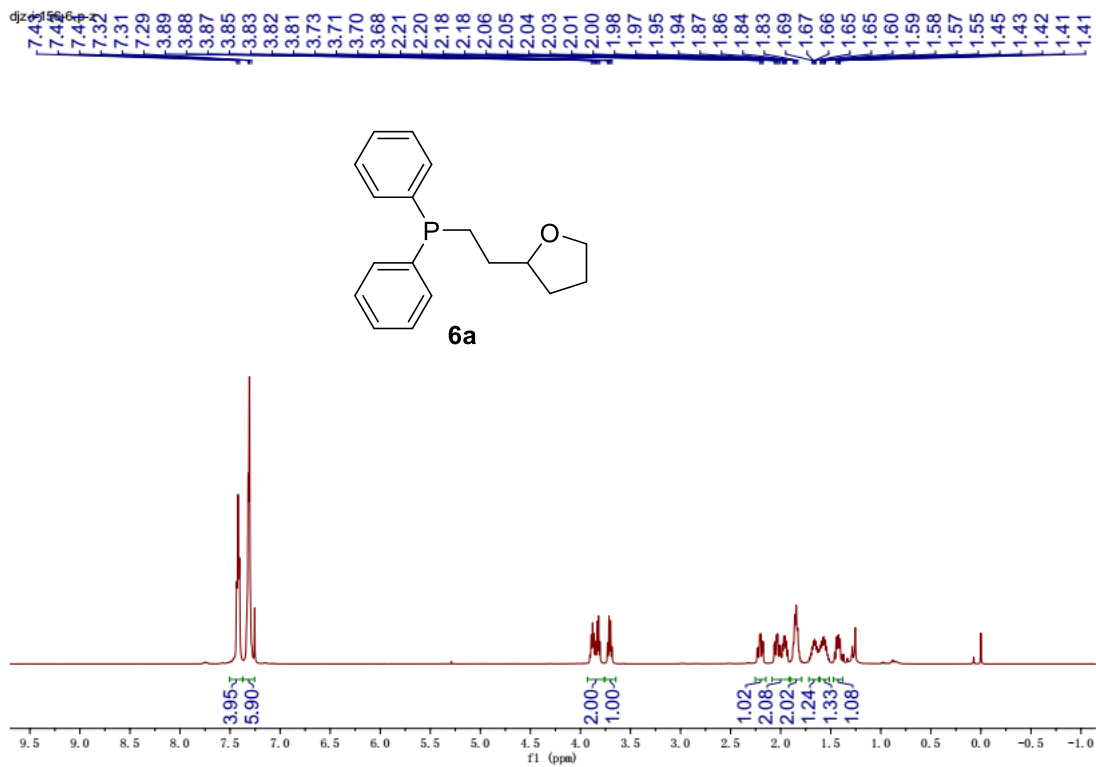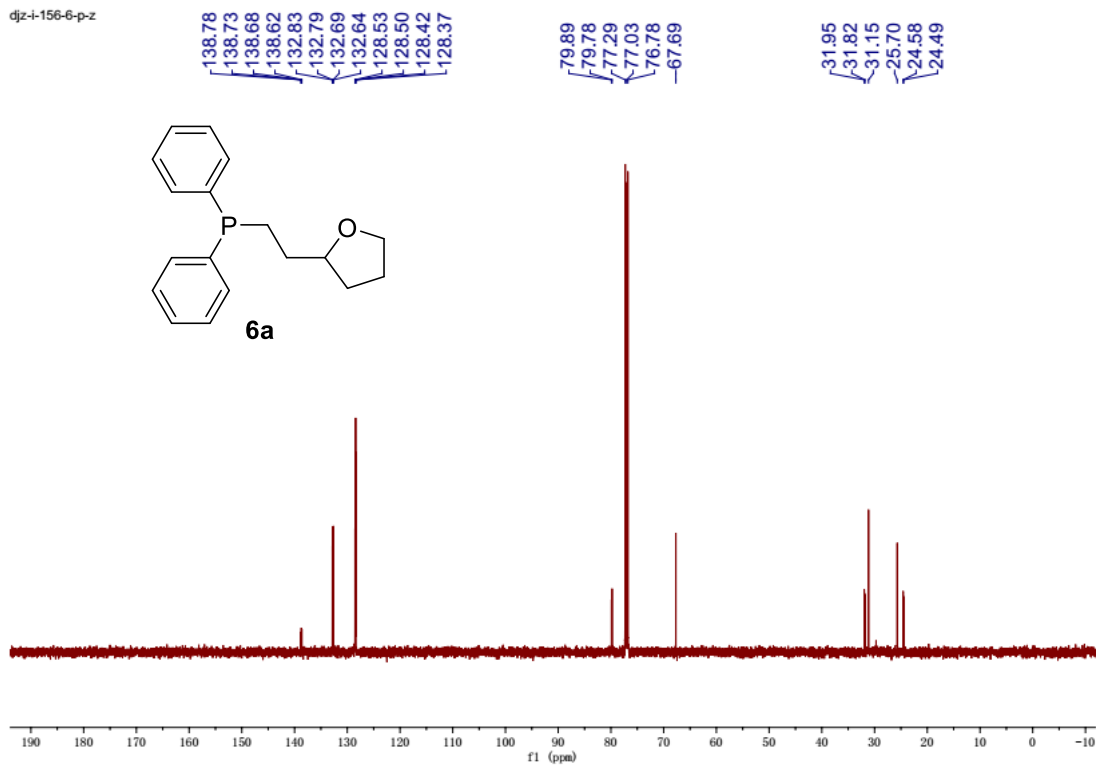

djz-1-156-6-p-z

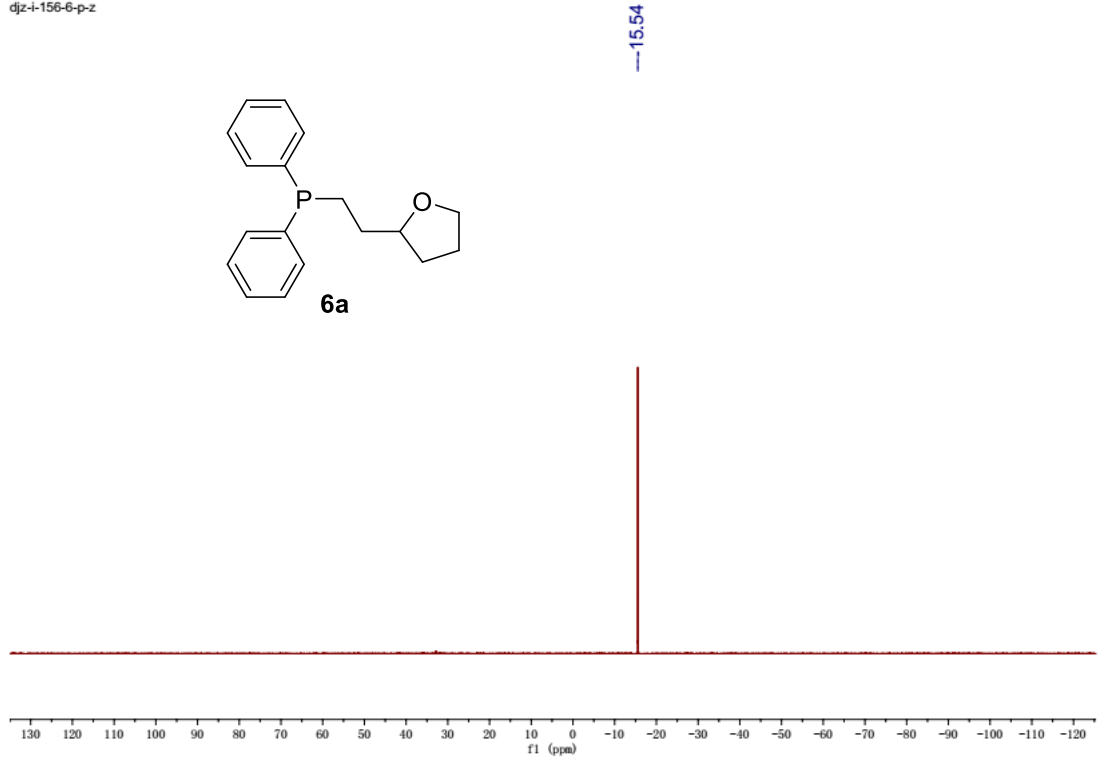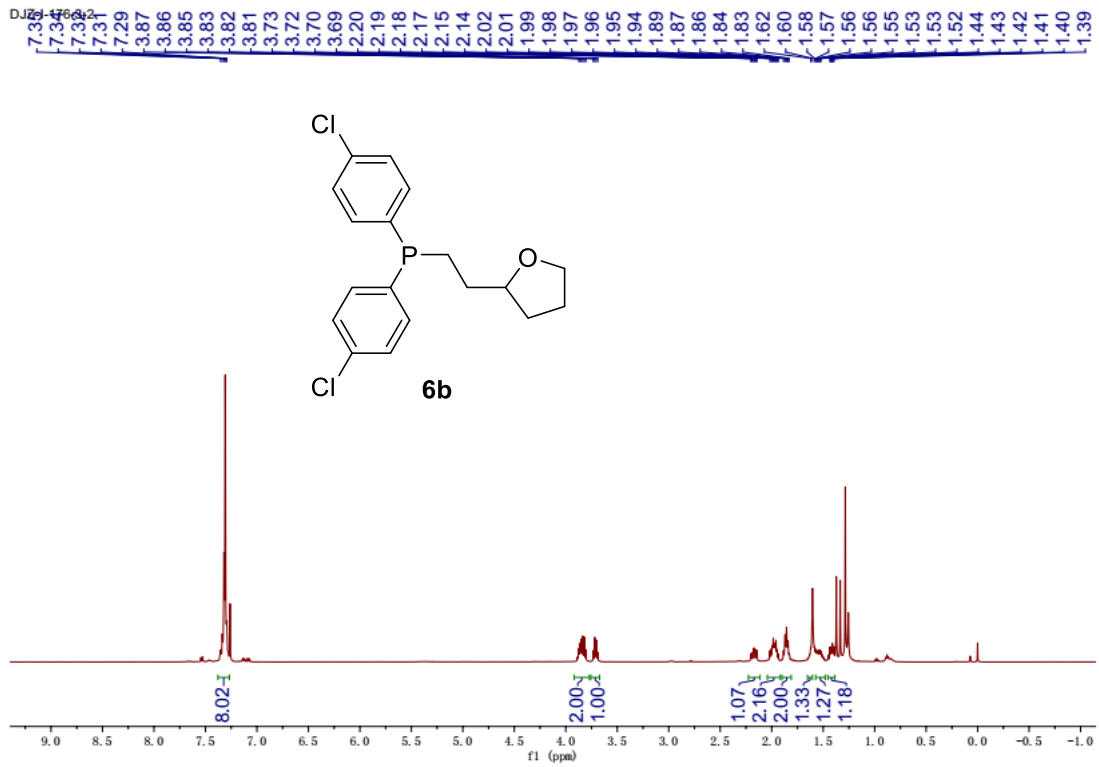

DJZ-1-176-3-2

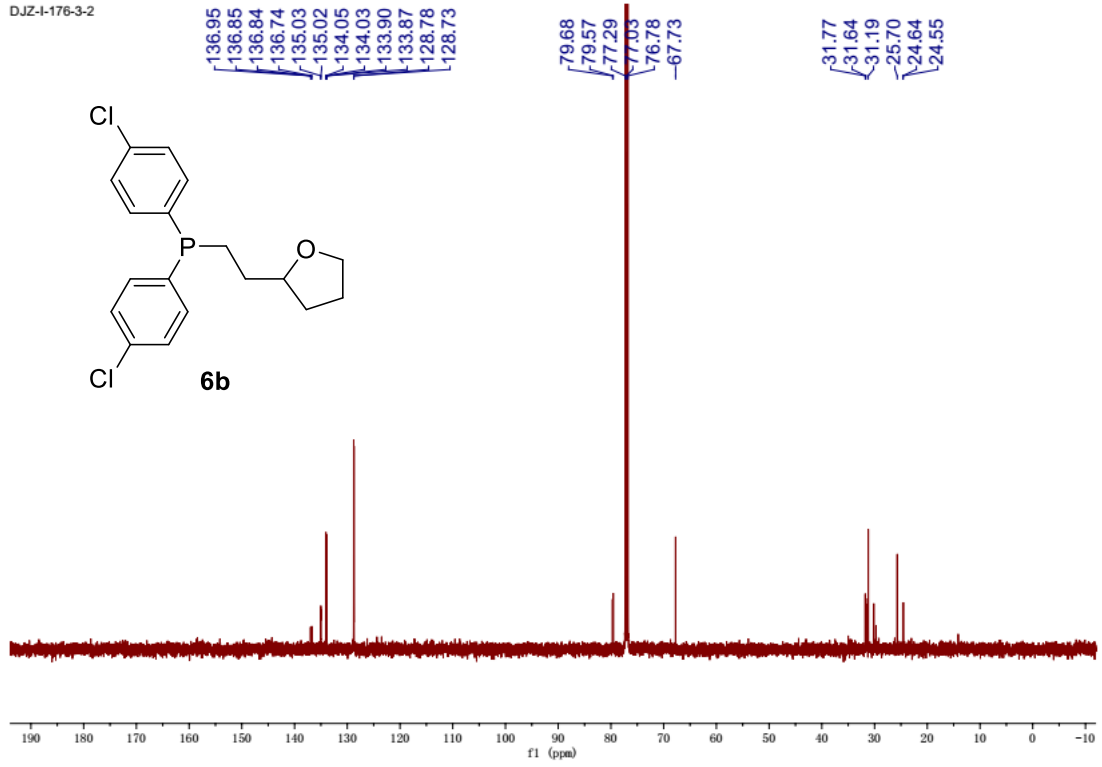

DJZ-1-176-3-2

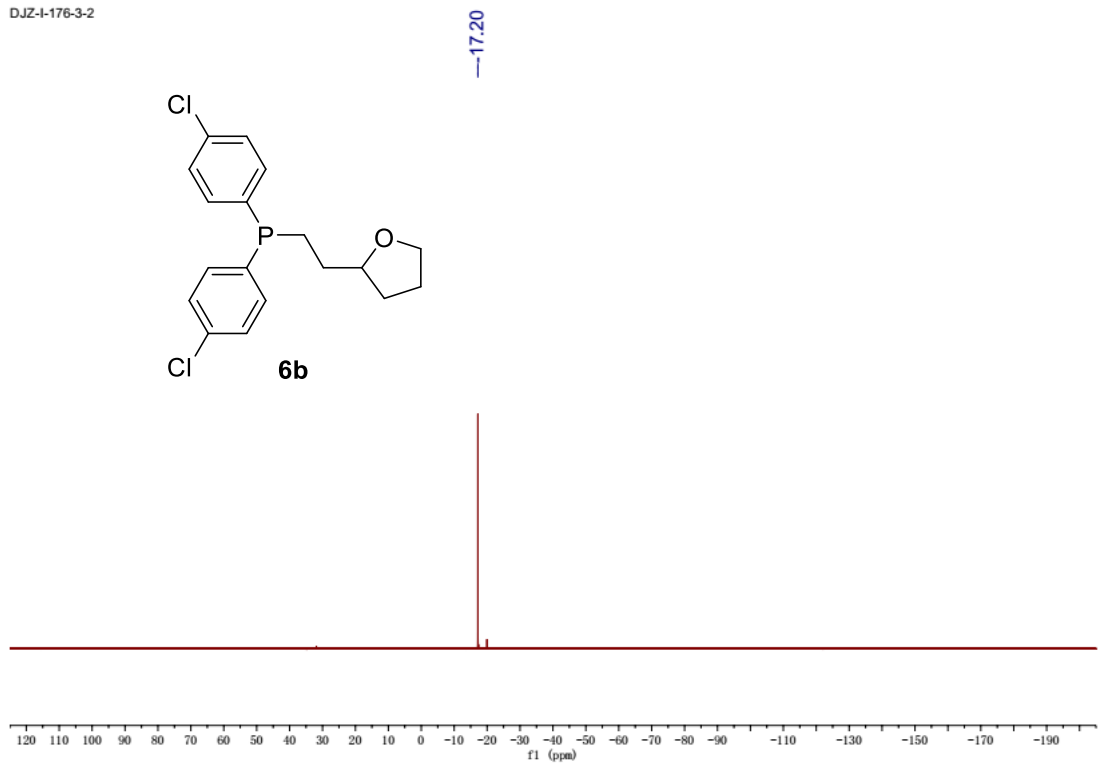

## 8. References

1. X. Zhang, J. Wang and S.-D. Yang, *ACS Catal.*, 2021, **11**, 14008-14015.
2. Y. Okugawa, Y. Hayashi, S. Kawauchi, K. Hirano and M. Miura, *Org. Lett.*, 2018, **20**, 3670-3673.
3. A. Yoshimura, Y. Saga, Y. Sato, A. Ogawa, T. Chen and L.-B. Han, *Tetrahedron Lett.*, 2016, **57**, 3382-3384.
4. C. Laye, J. Lusseau, F. Robert and Y. Landais, *Adv. Synth. Catal.*, 2021, **363**, 3035-3043.
5. K. Kim, A. M. P. Moeljadi, H. Hirao and S. H. Hong, *Adv. Synth. Catal.*, 2017, **359**, 3292-3298.
